# Supplementary material for: Flow Hydrodediazoniation of Aromatic Heterocycles
Source: PubMed Central journal article supplement (PMC6572451; doi:10.3390/molecules24101996), 2019-05-24

*Supplementary Information*

# Flow Hydrodediazonation of Aromatic Heterocycles

Liesa Röder,<sup>1</sup> Alexander J. Nicholls<sup>2</sup> and Ian R. Baxendale<sup>2,\*</sup>

<sup>1</sup> Department of Biology, Chemistry, and Pharmacy, Freie Universität Berlin; 14195 Berlin, Germany.

<sup>2</sup> Department of Chemistry, University of Durham, South Road, Durham, Durham, UK. DH1 3LE.

<sup>3</sup> Thomas Swan & Co. Ltd. Rotary Way, Consett, Durham, UK. DH8 7ND.

\* Correspondence: i.r.baxendale@durham.ac.uk;

Copies of <sup>1</sup>H, <sup>13</sup>C, DEPT 135 and if applicable <sup>19</sup>F spectra for starting materials **1** and isolated products **2**.

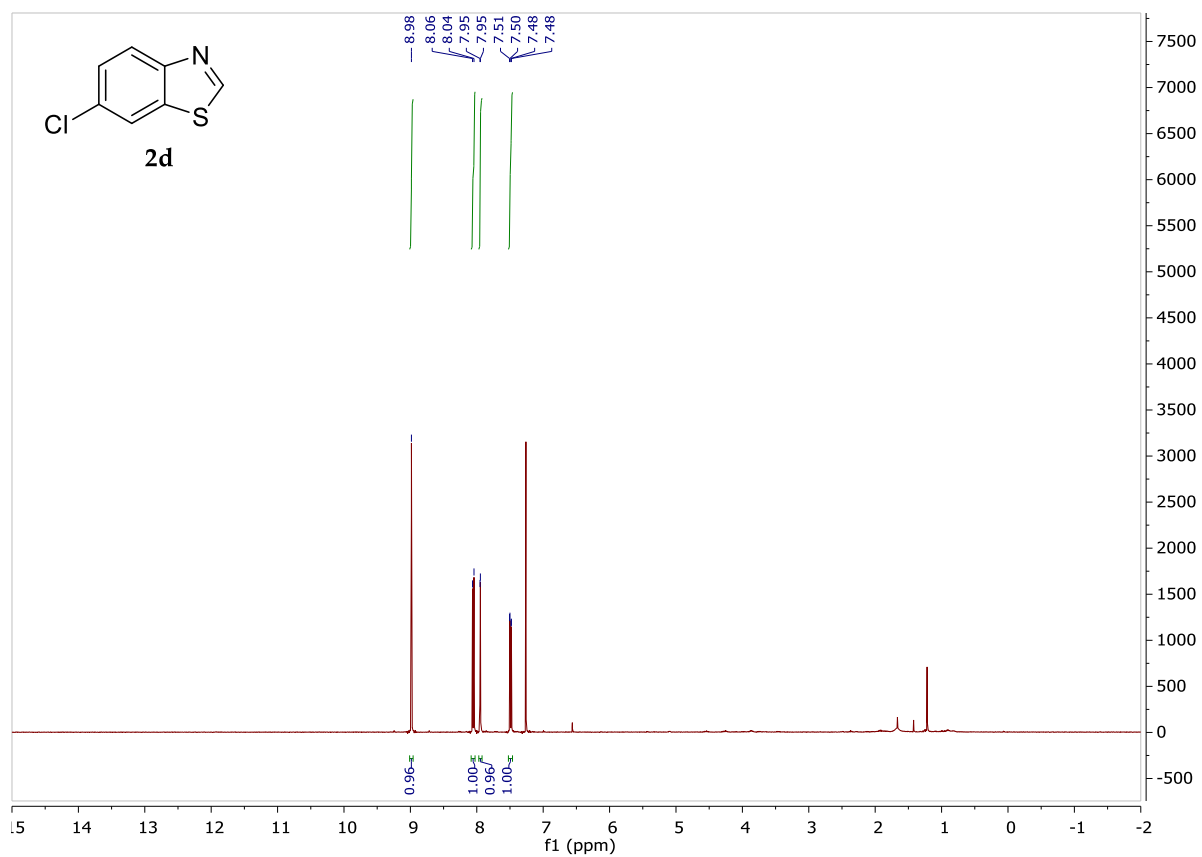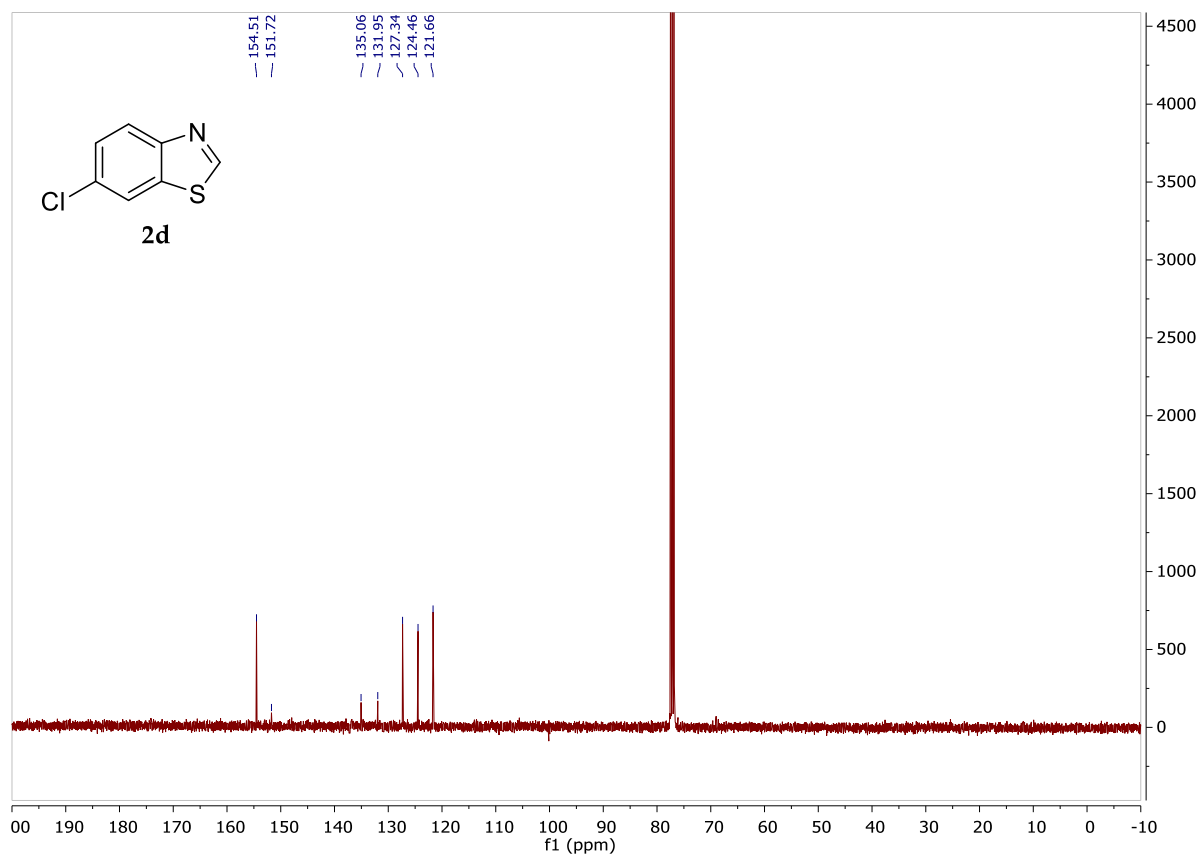

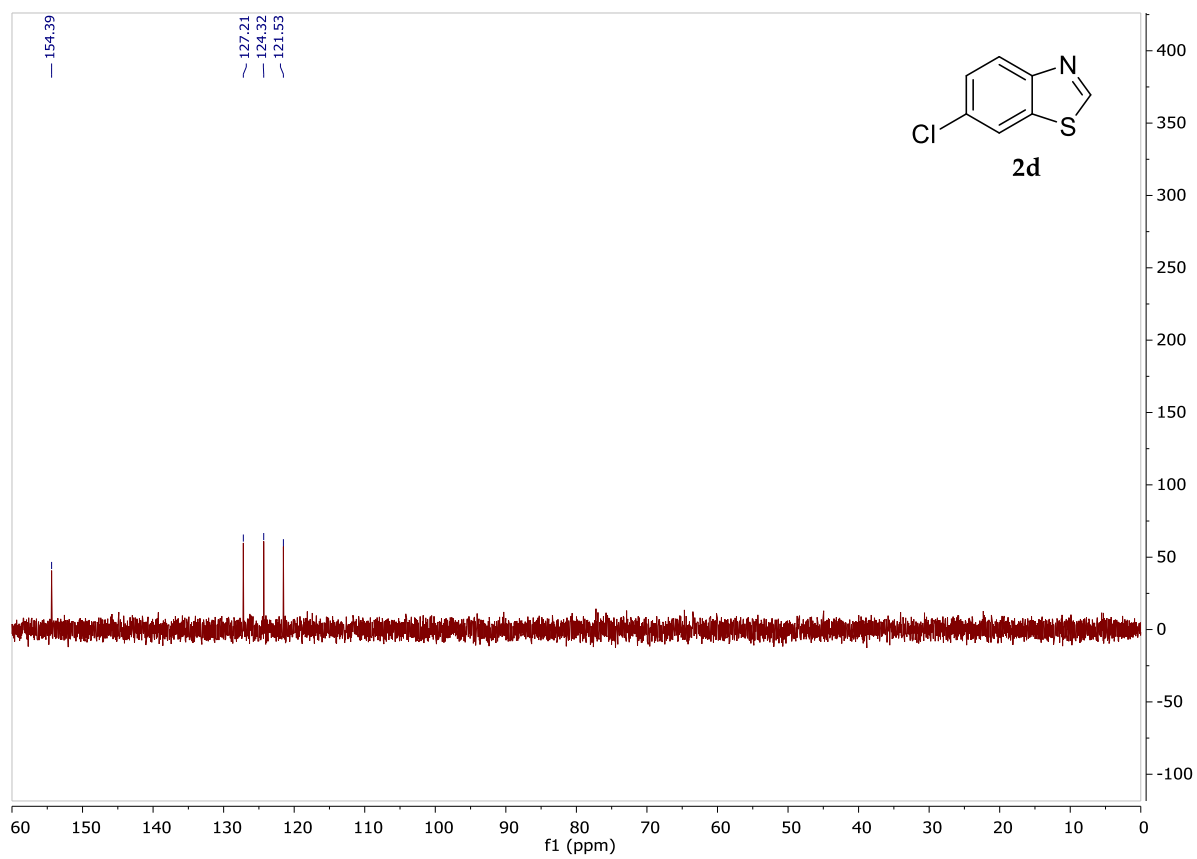

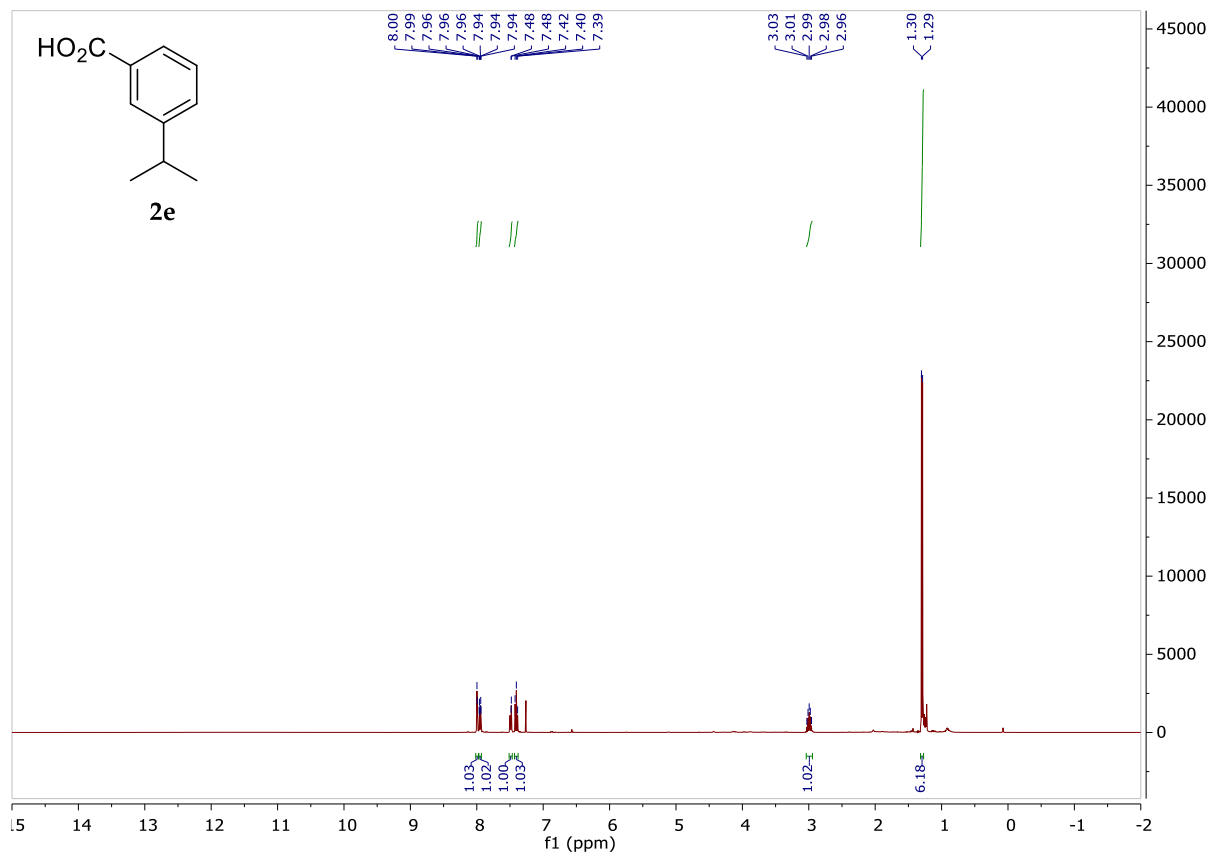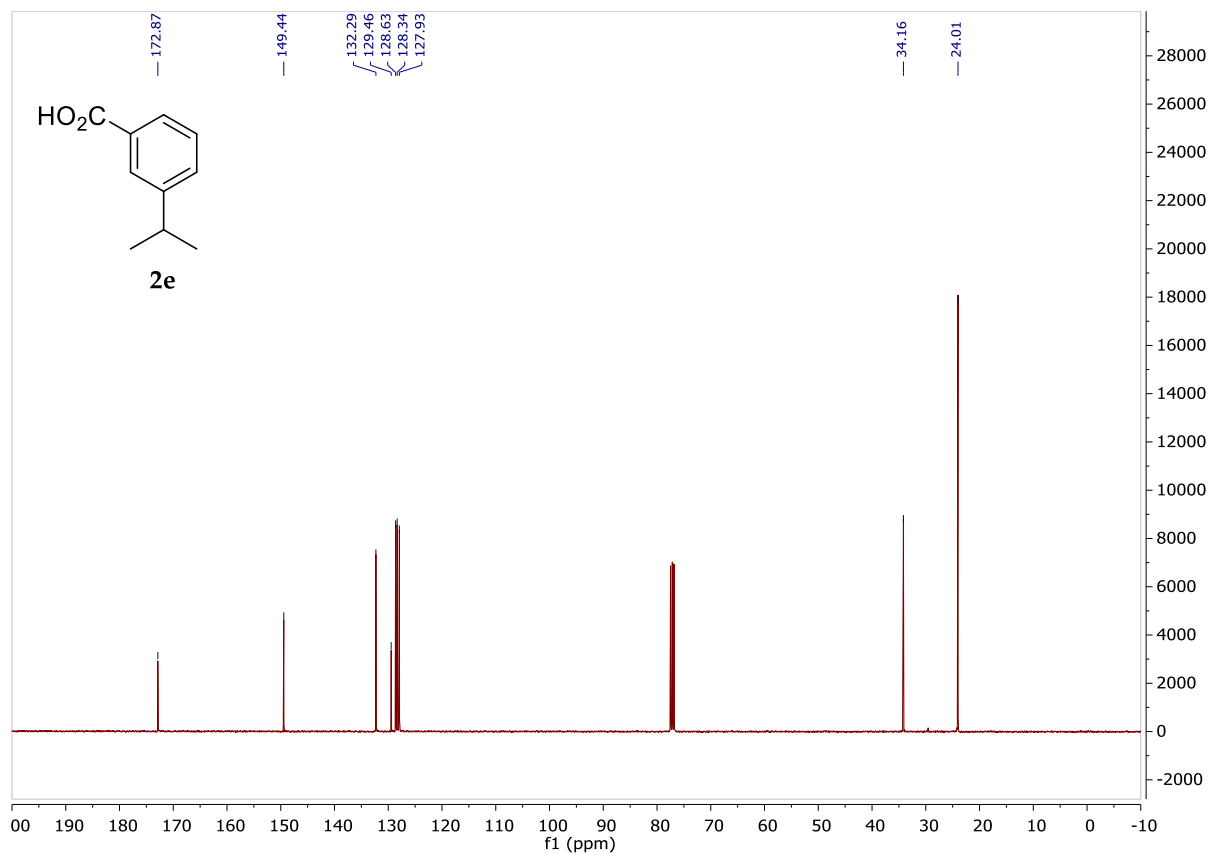

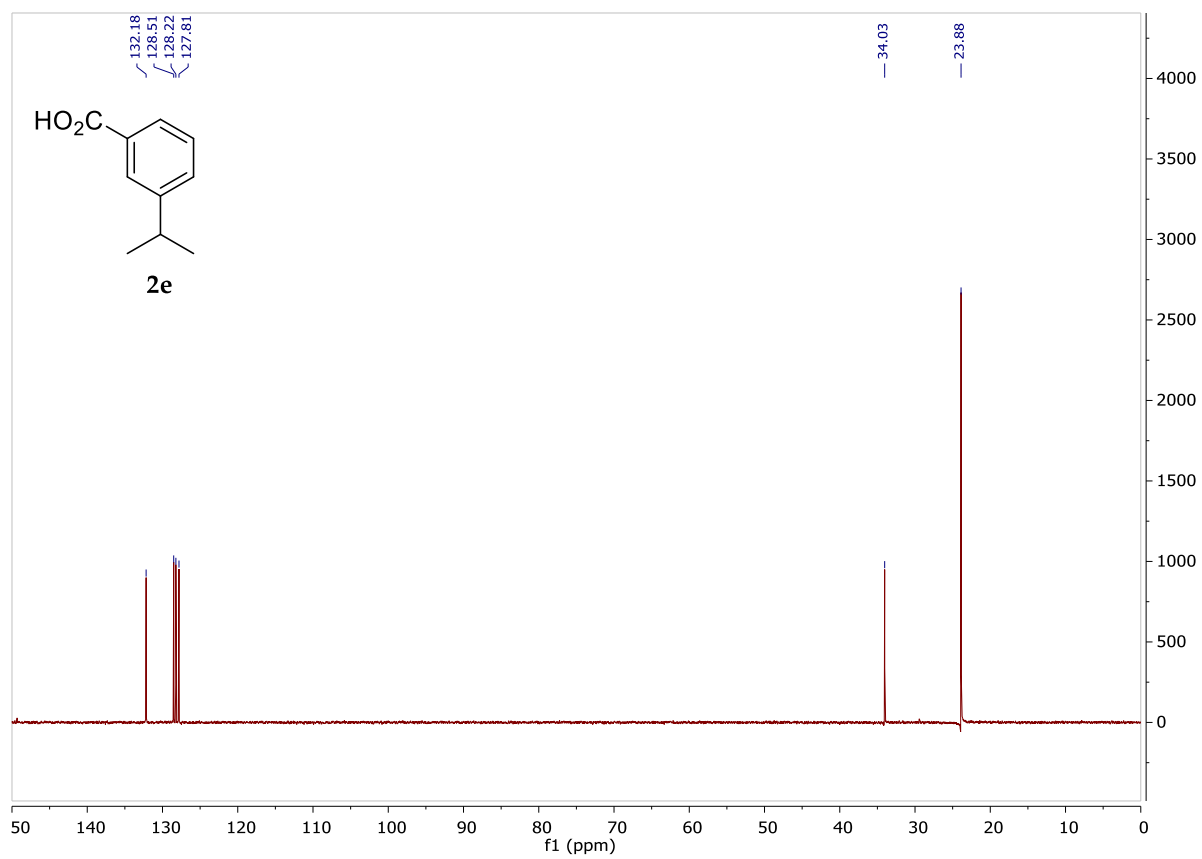

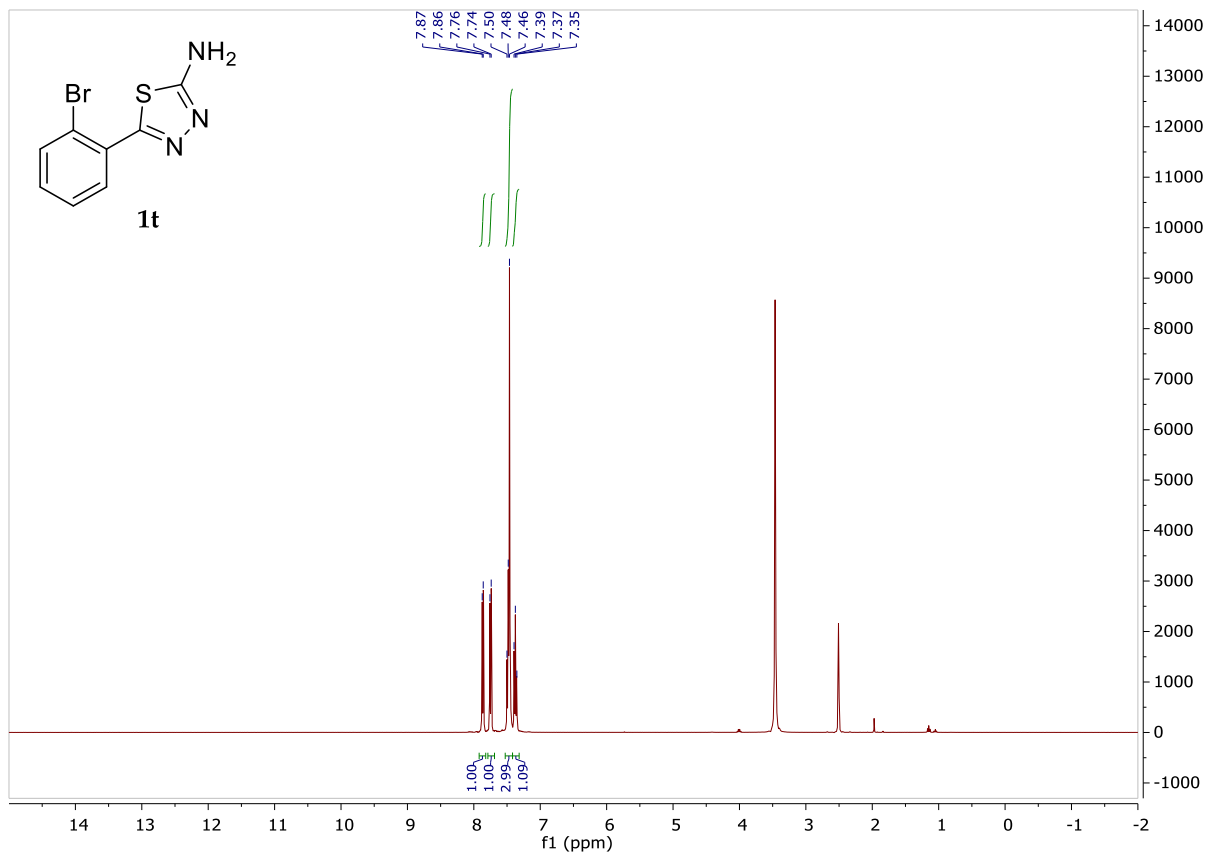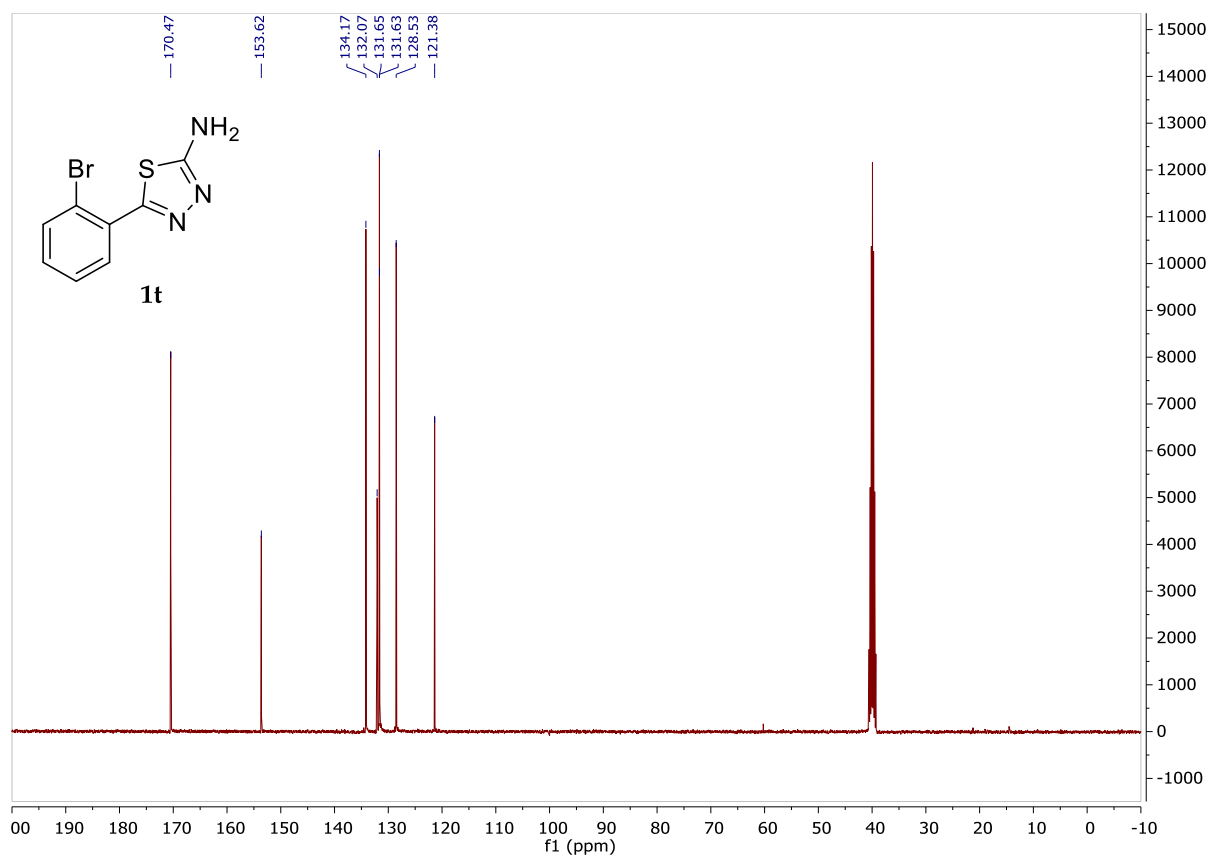

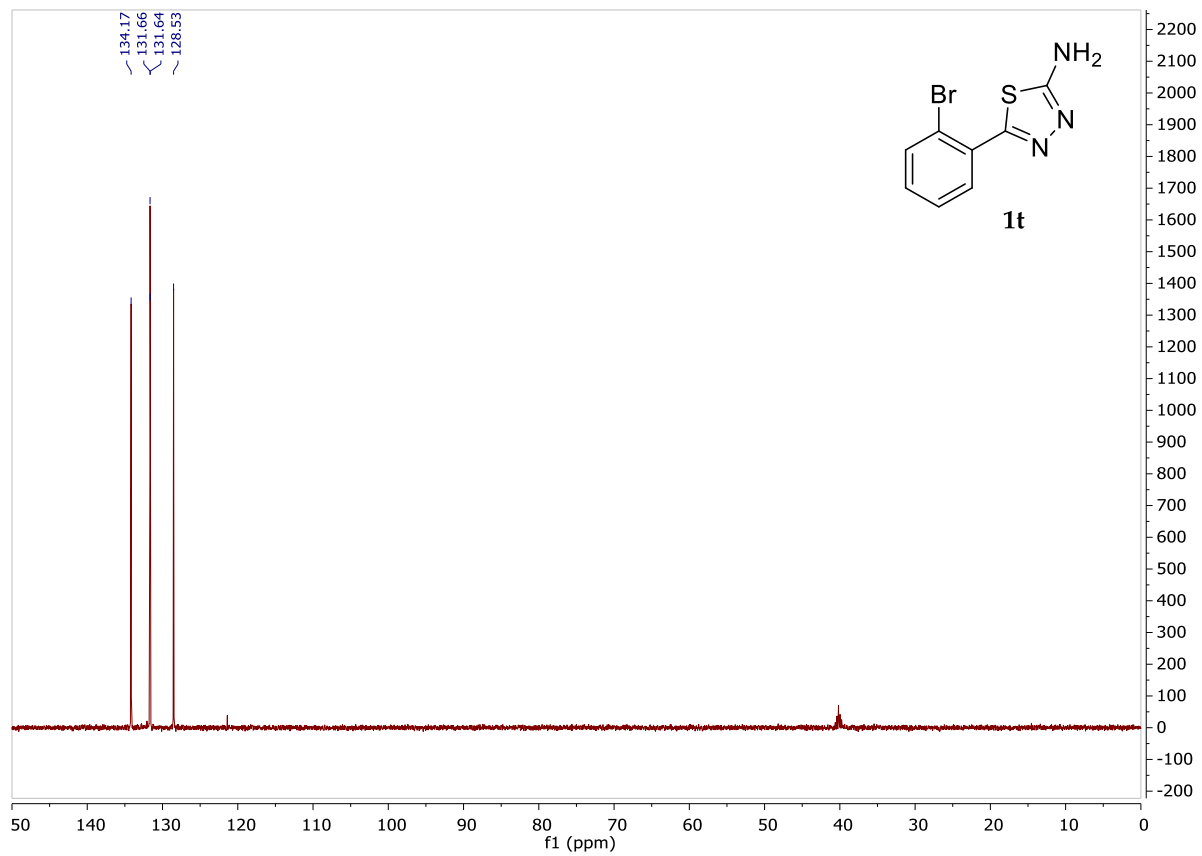

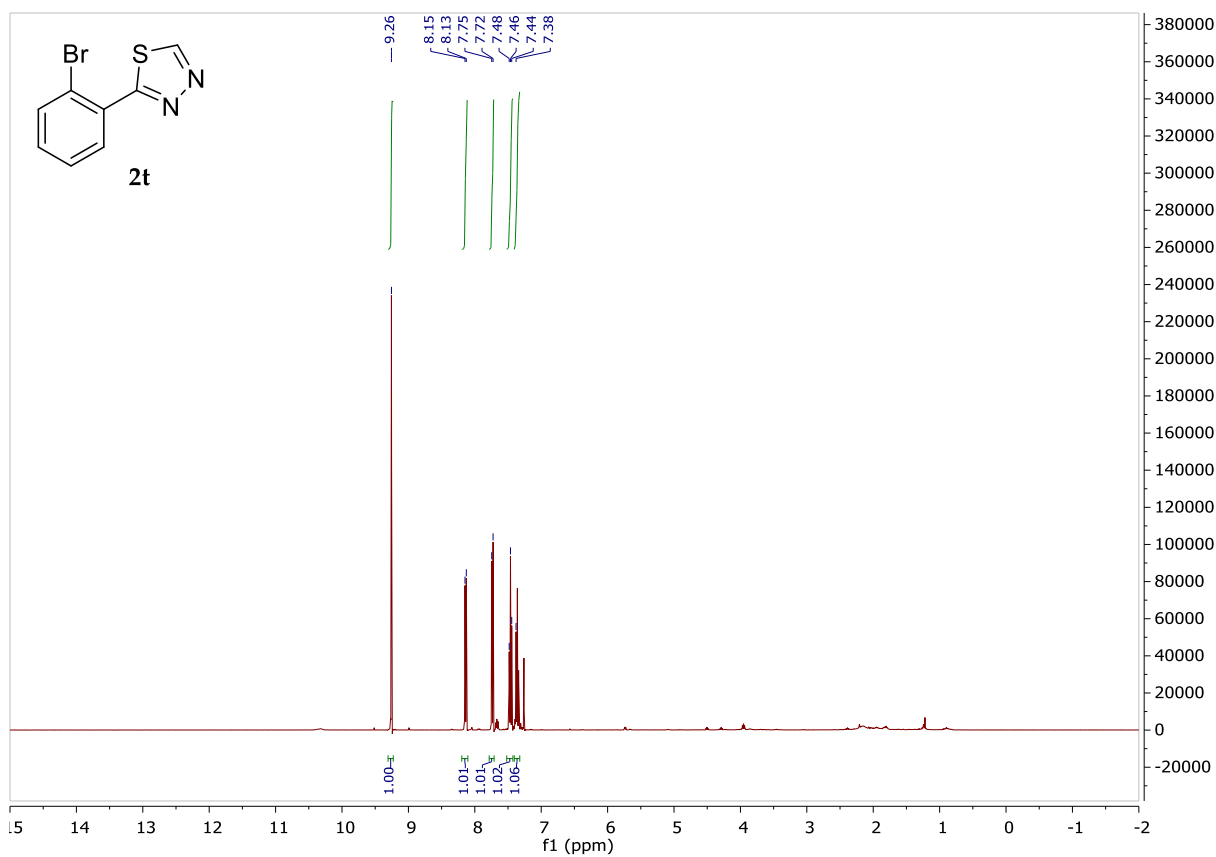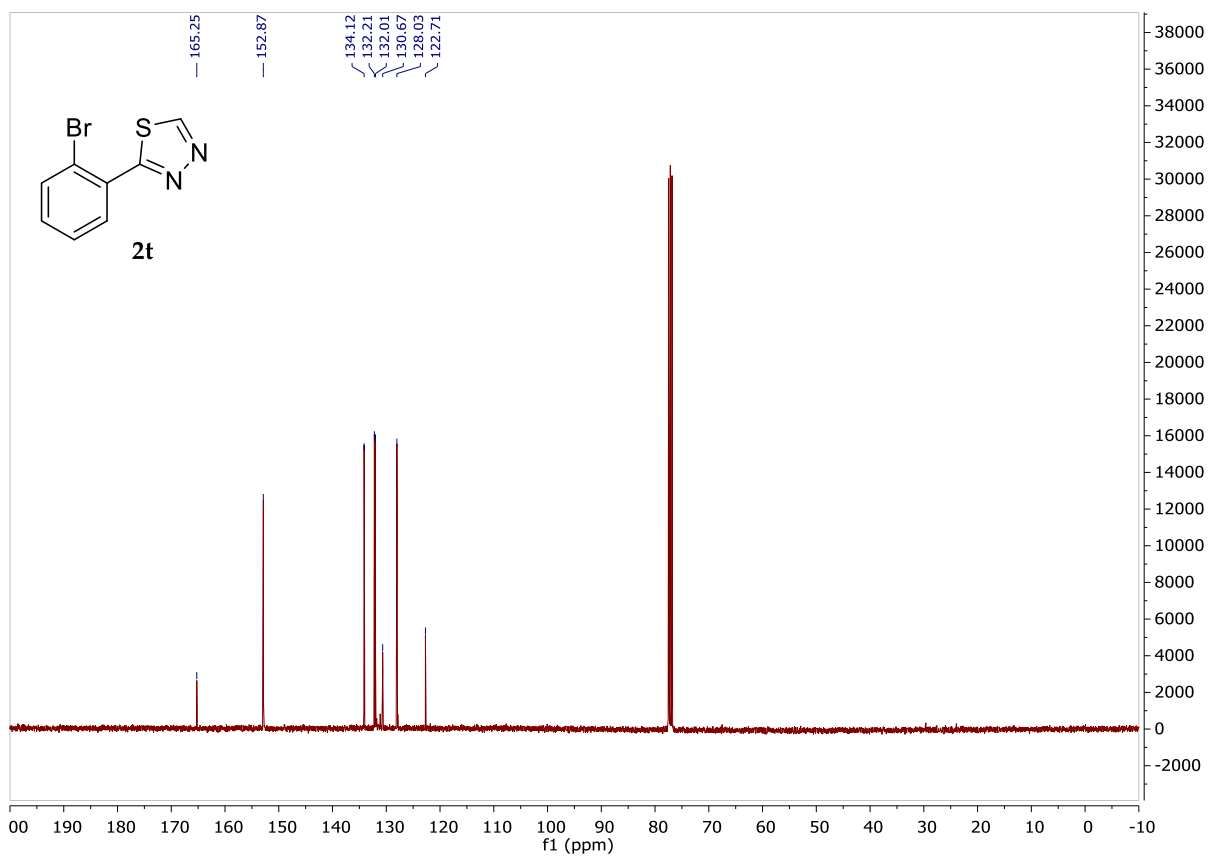



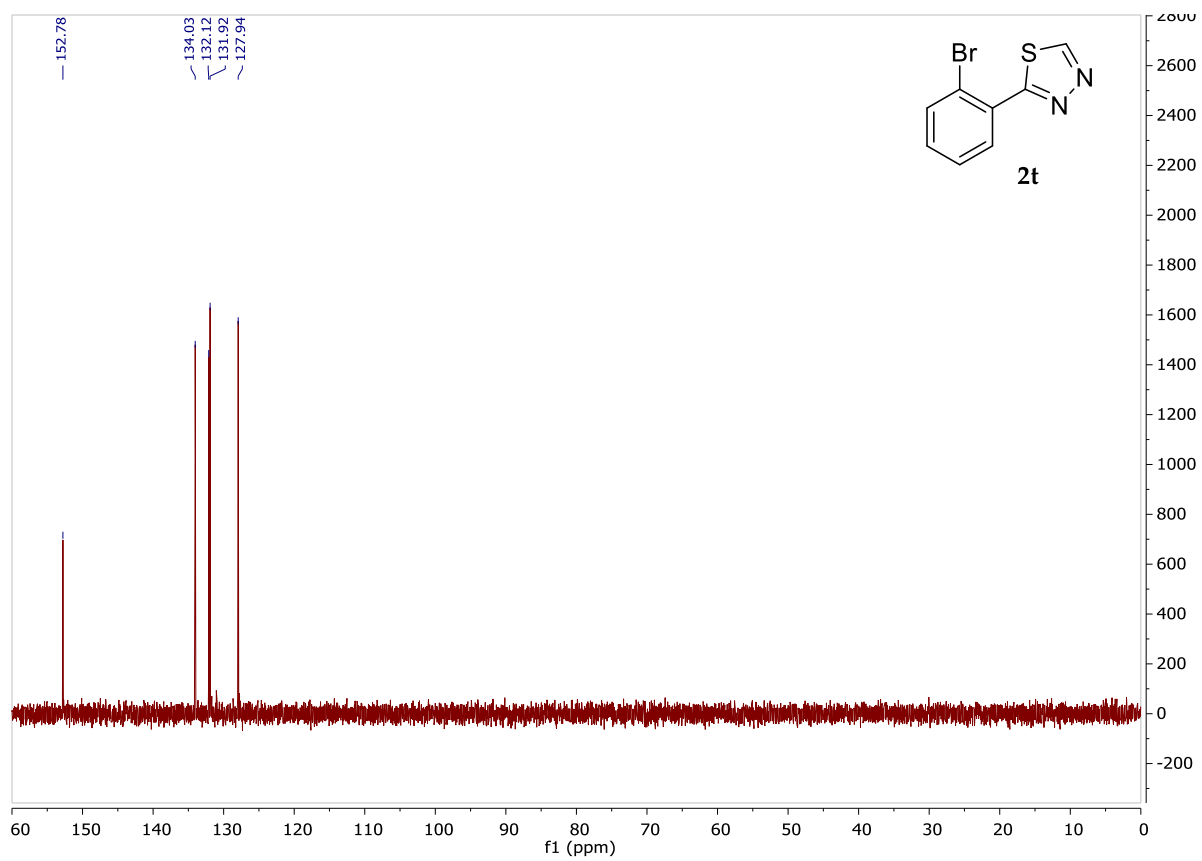

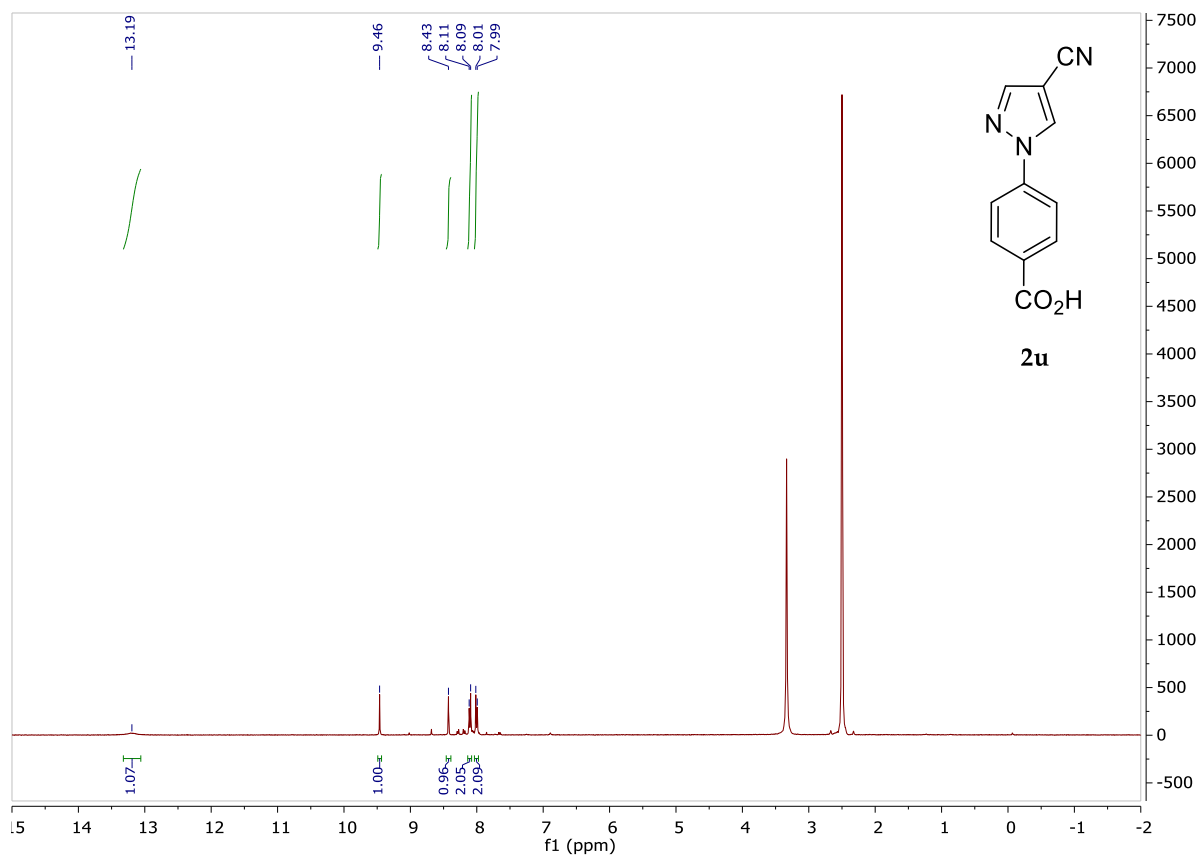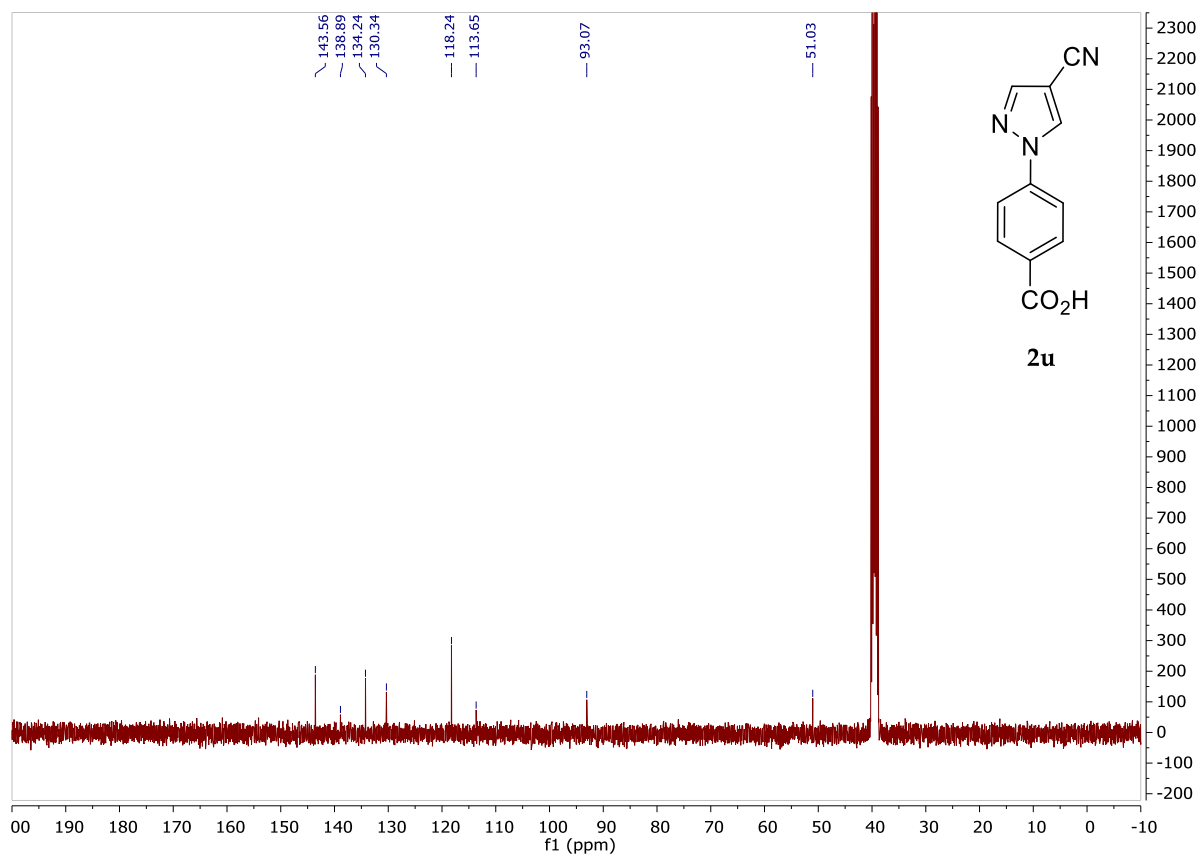

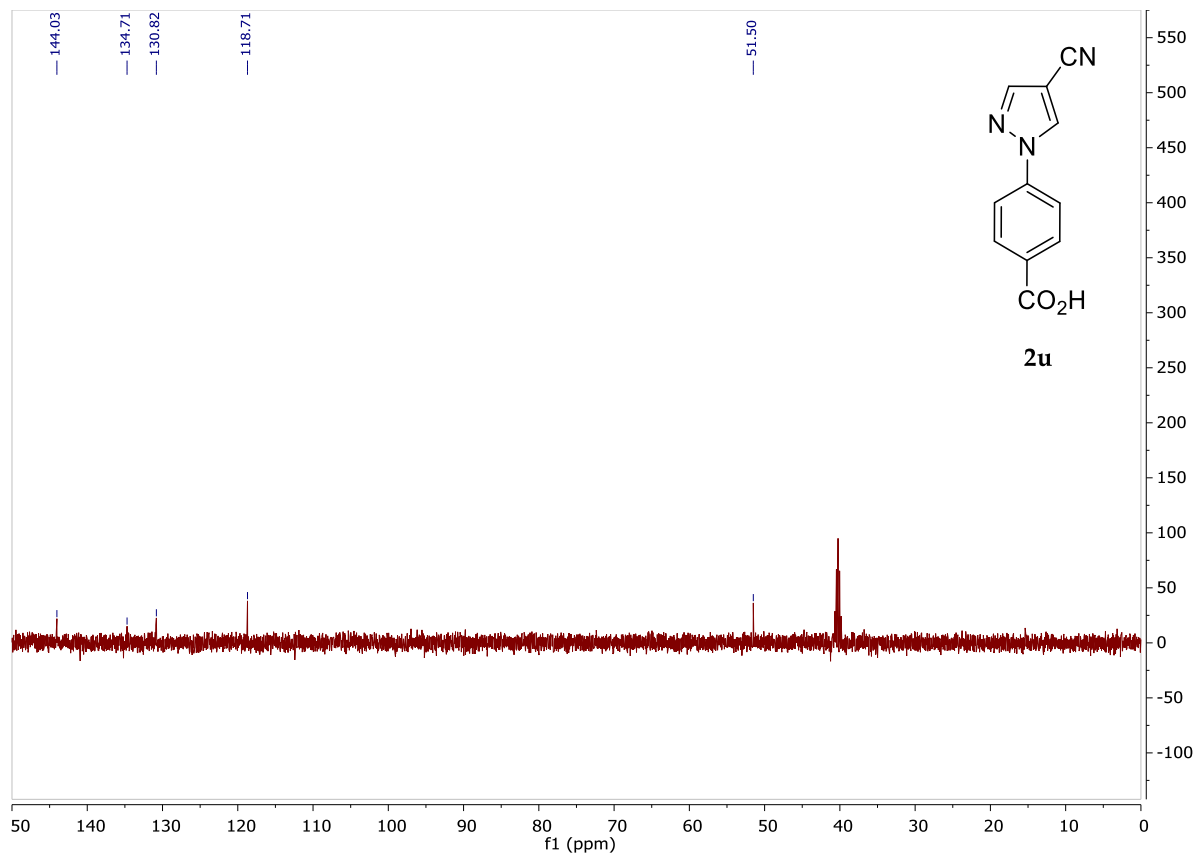

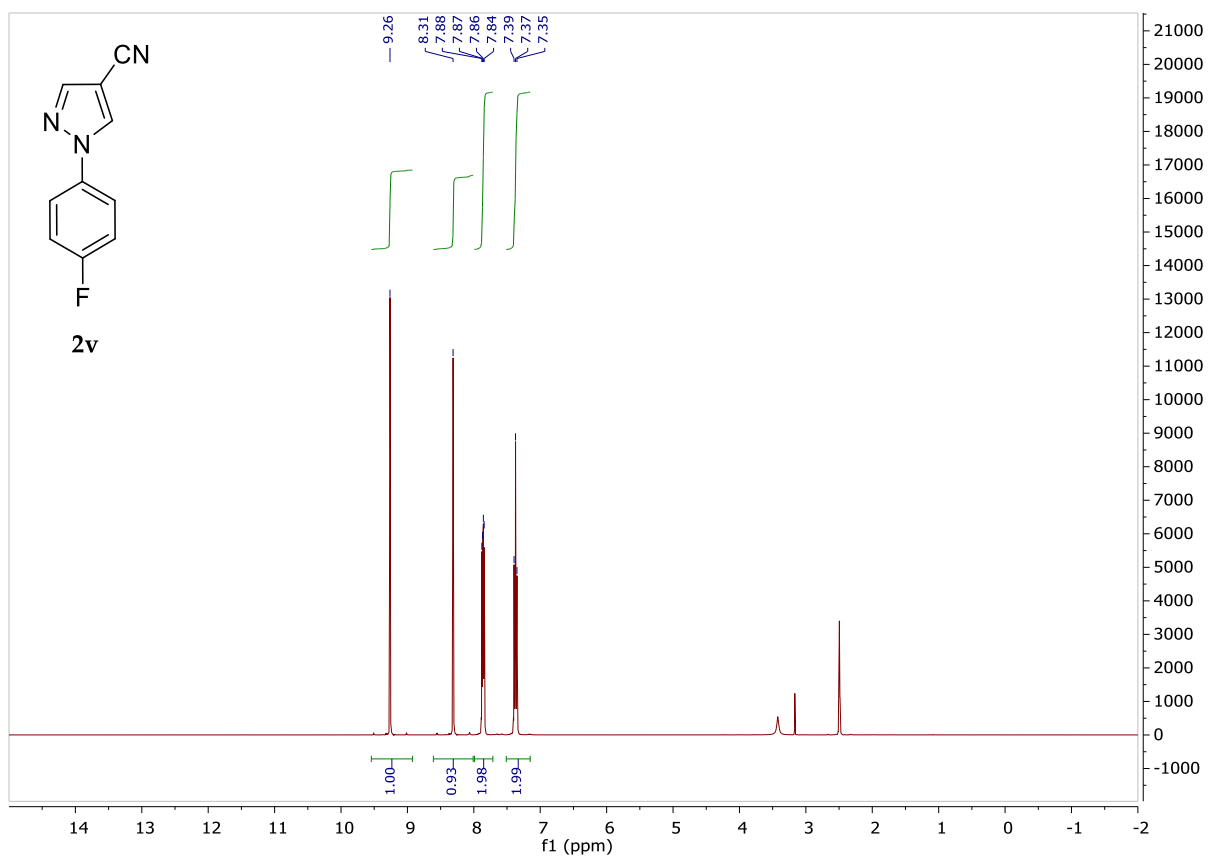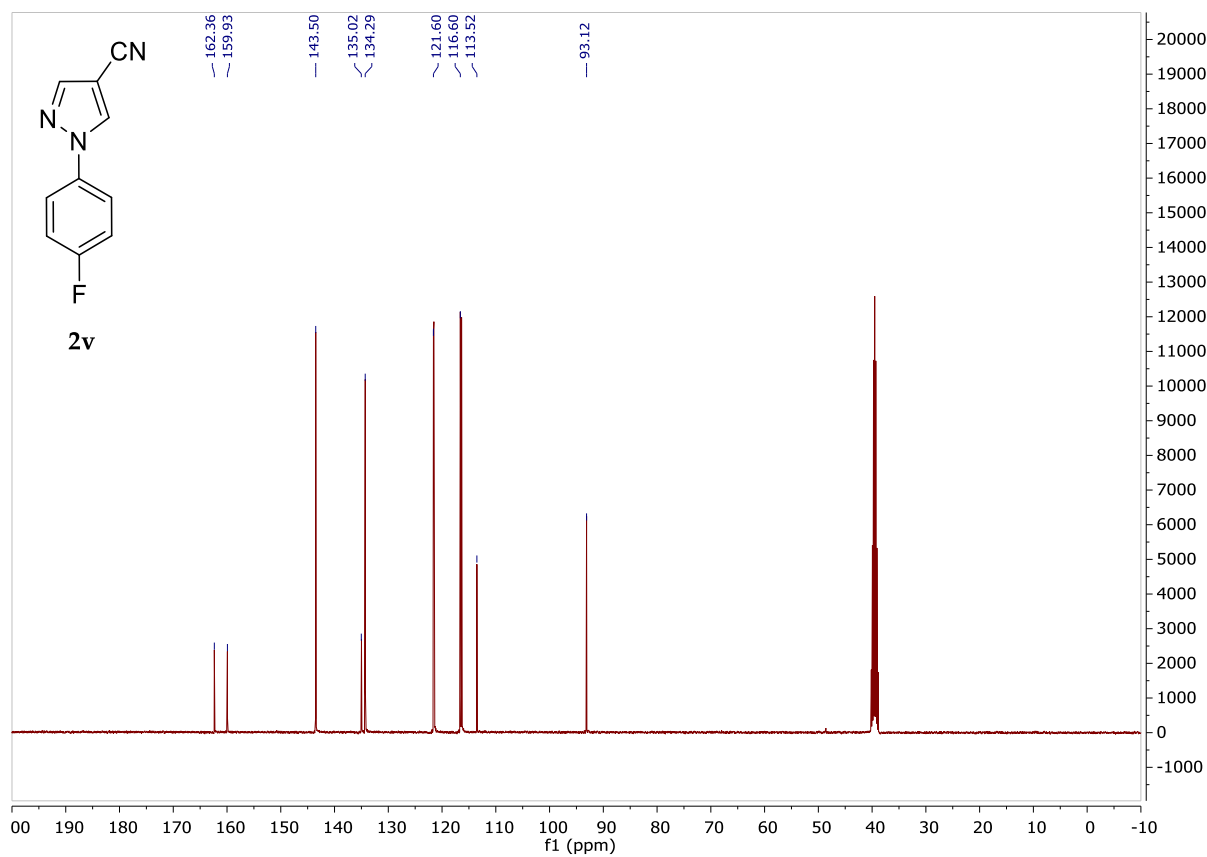

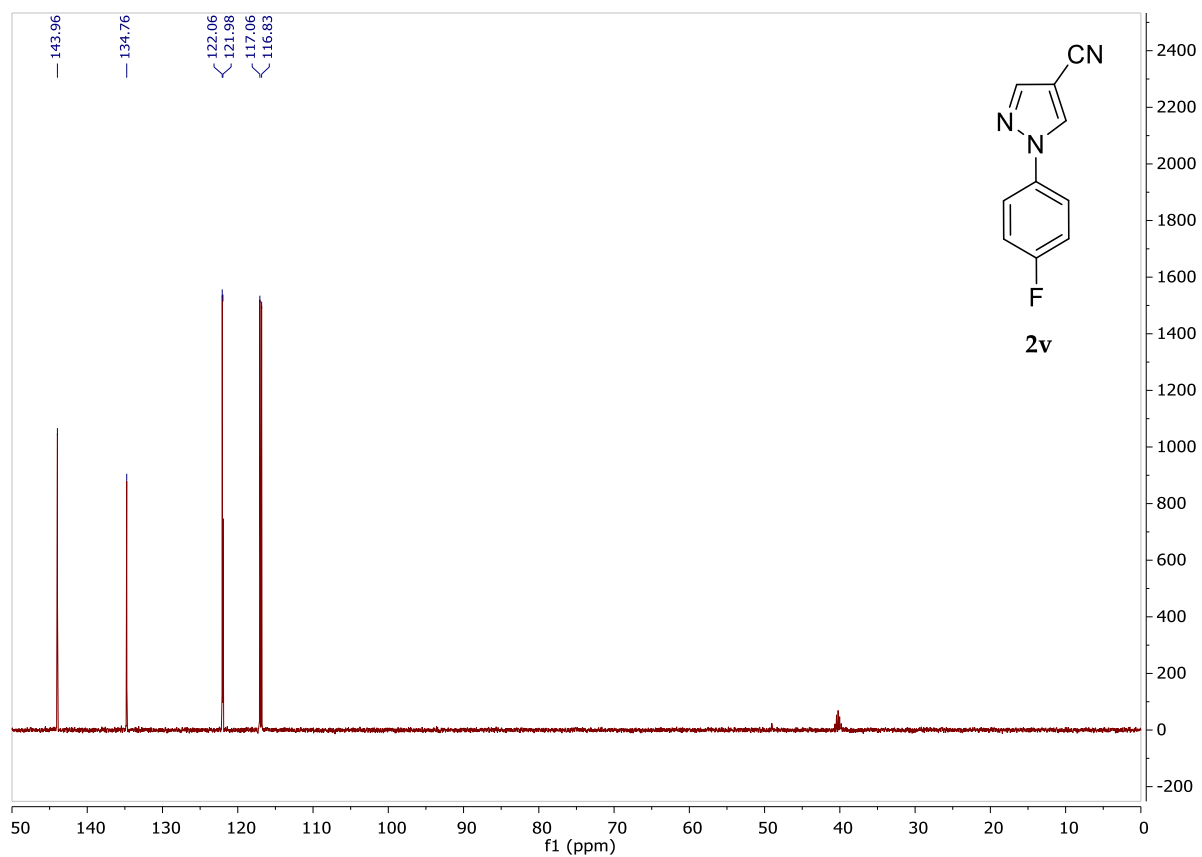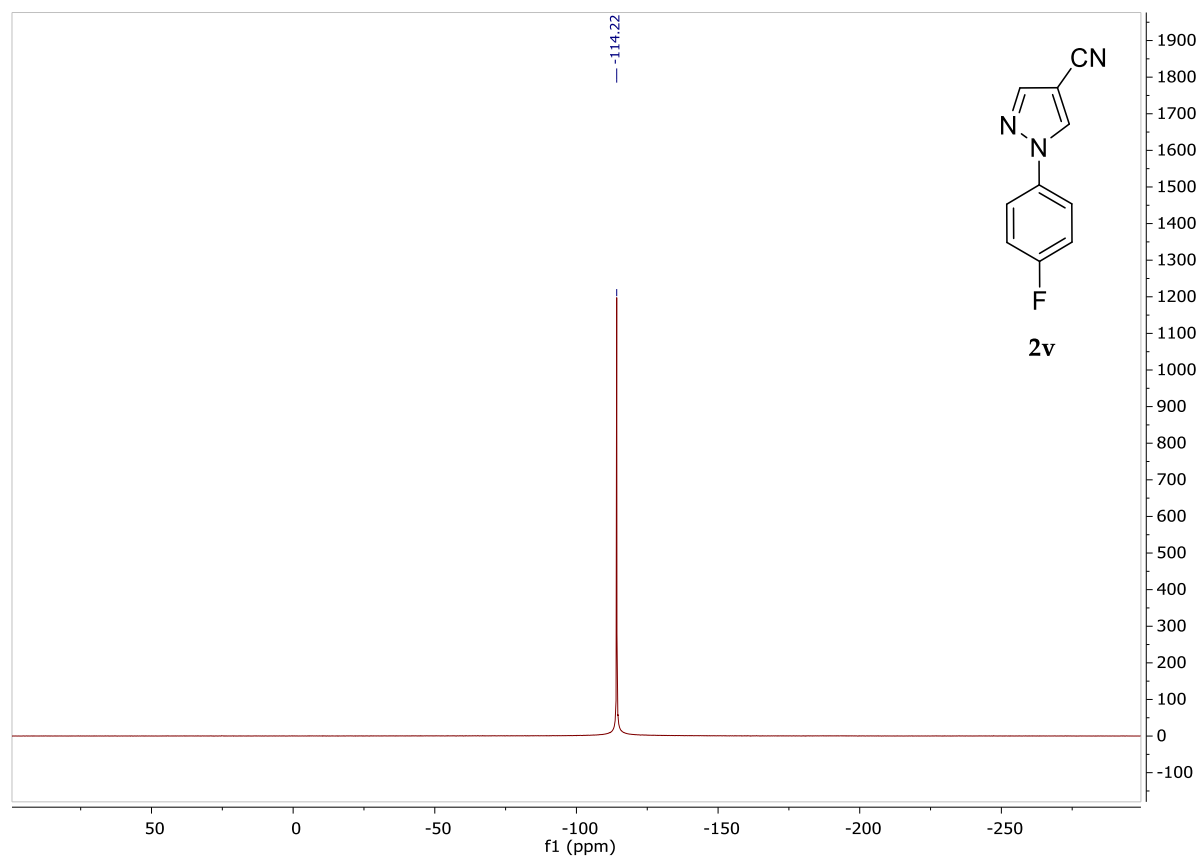

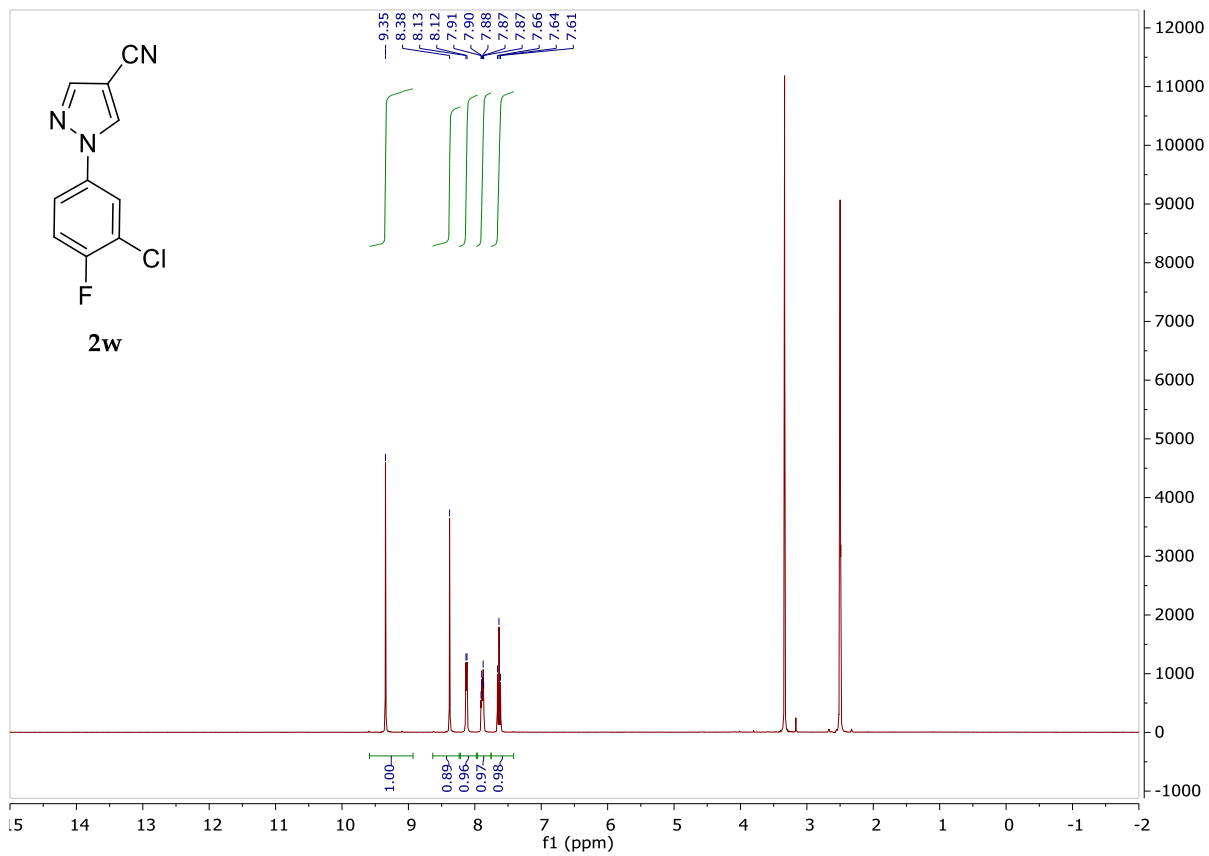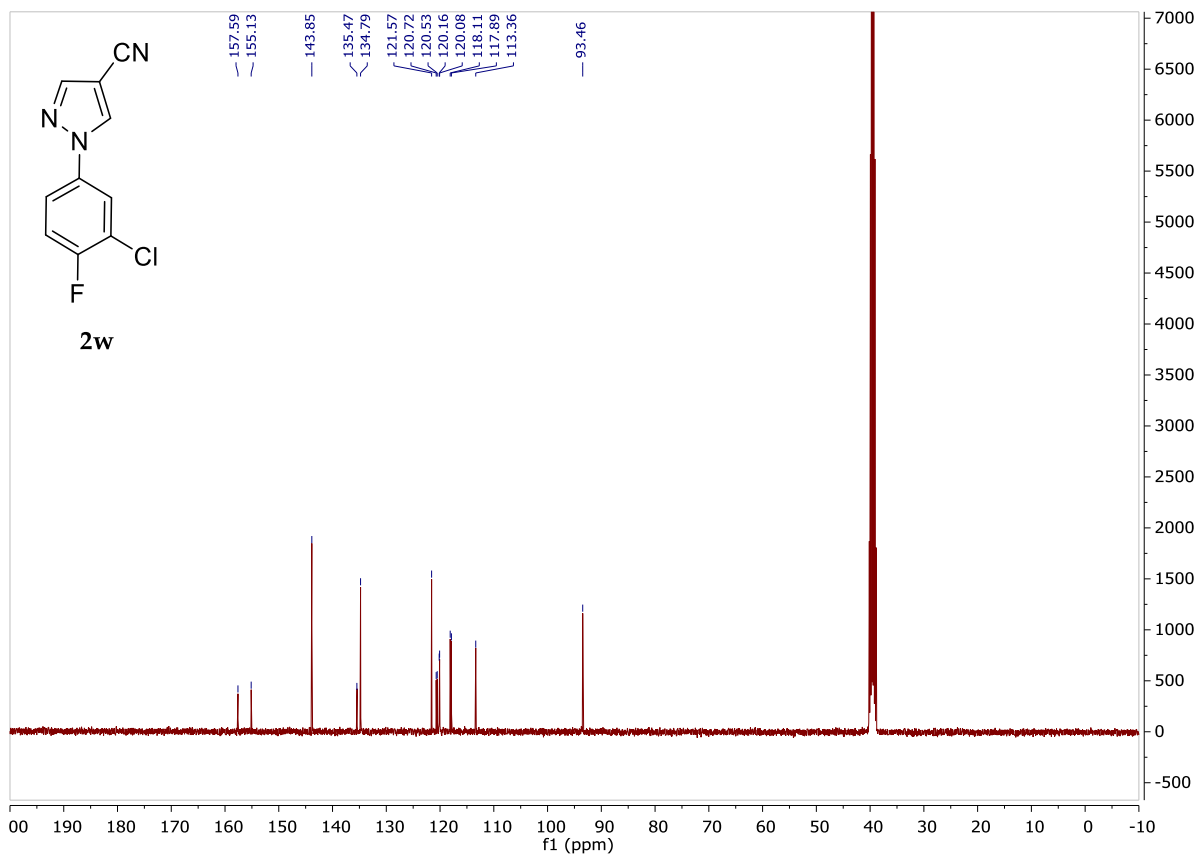

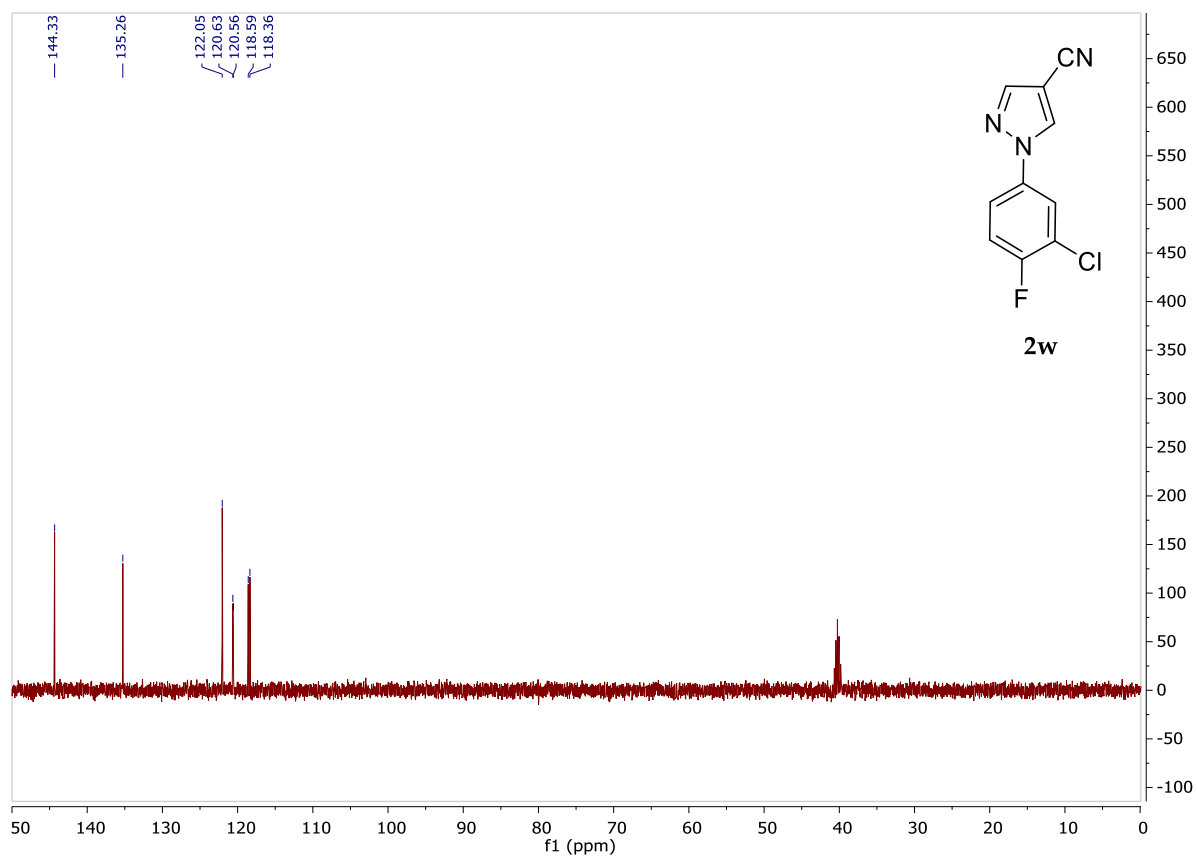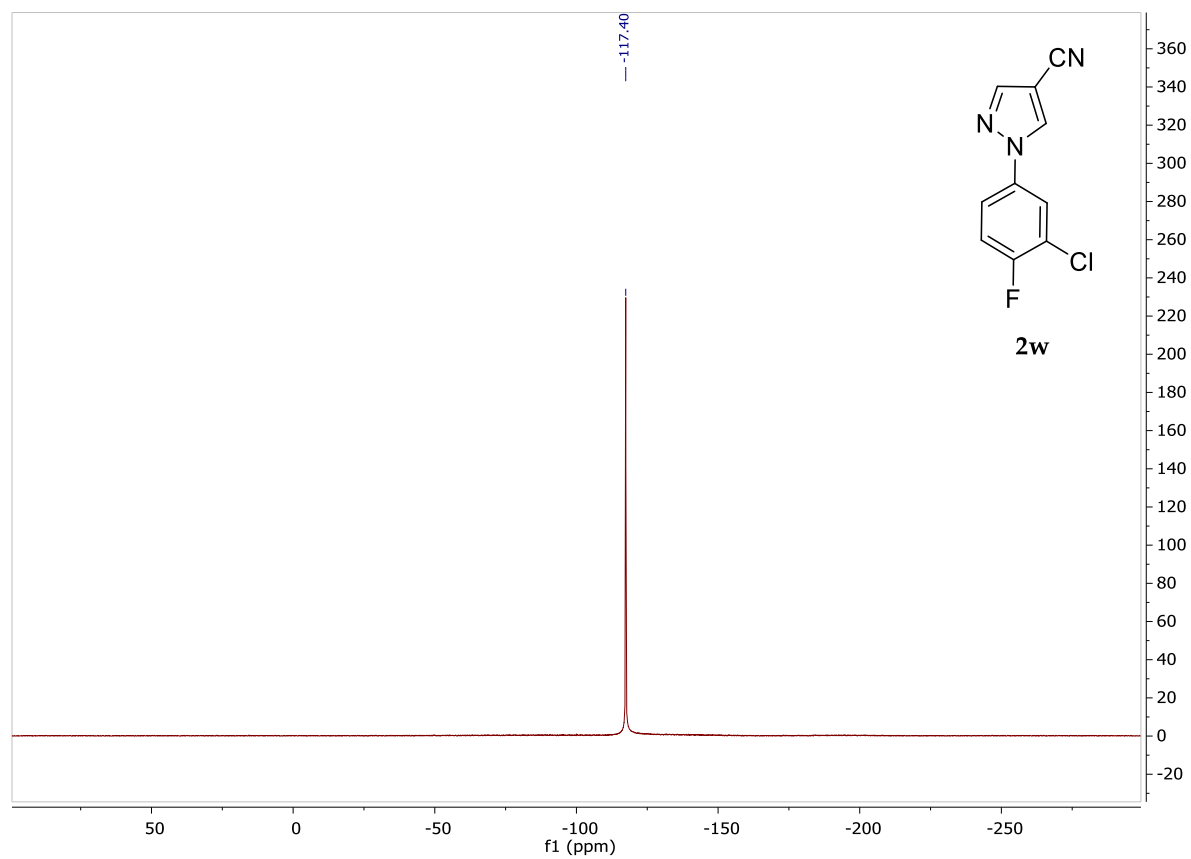

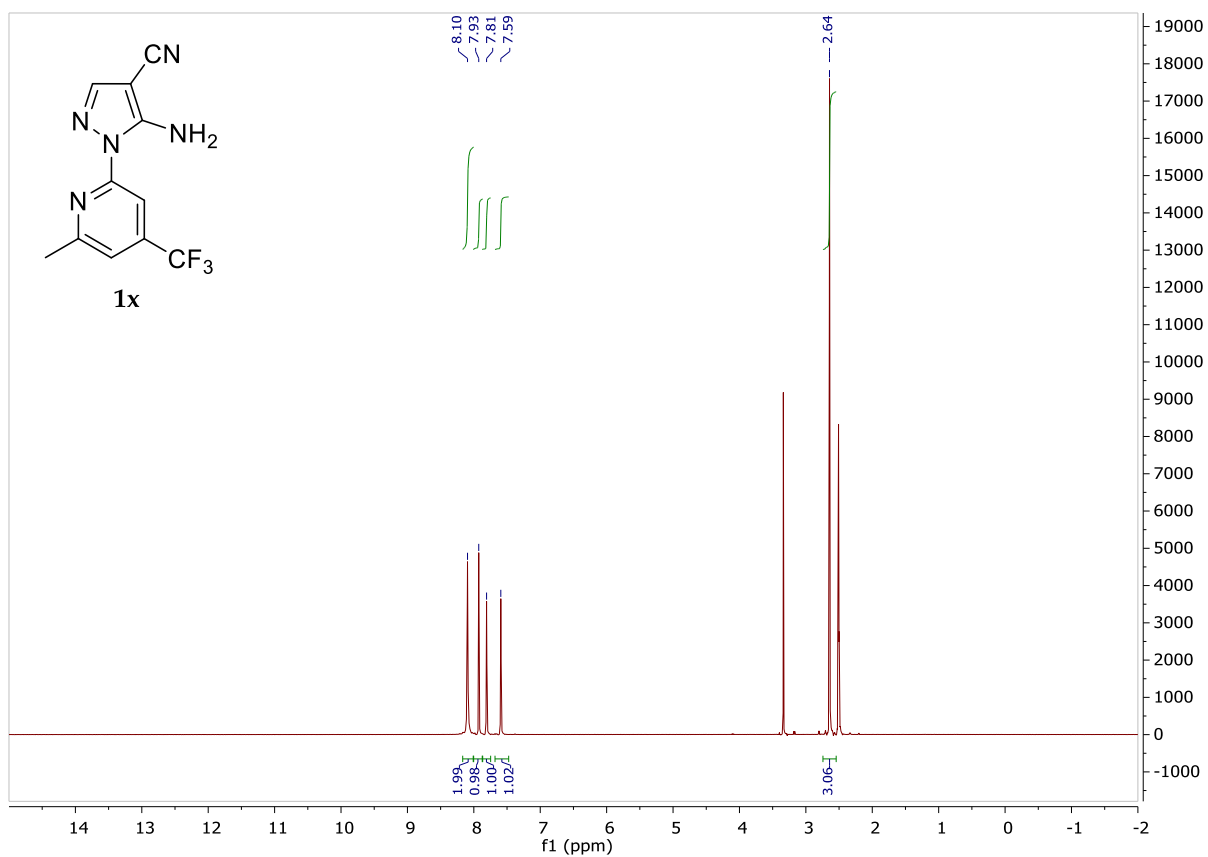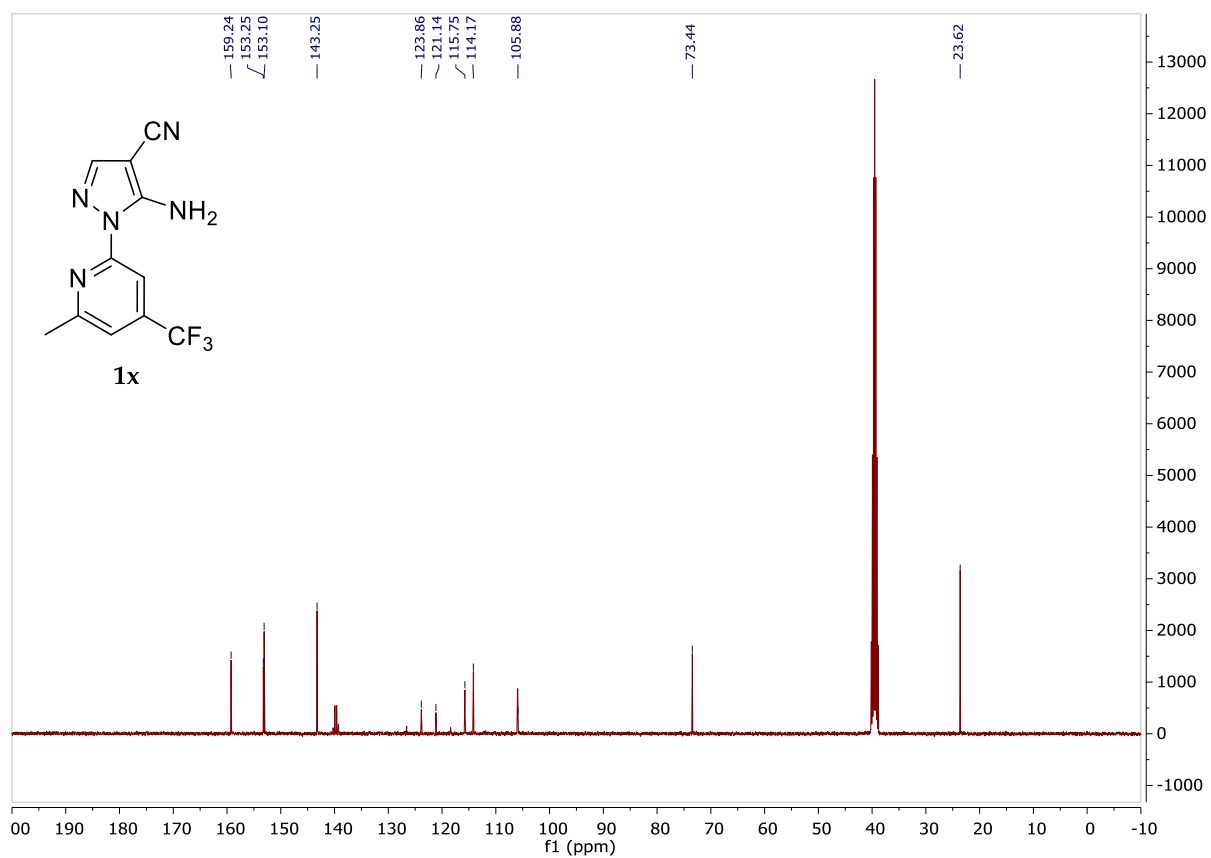



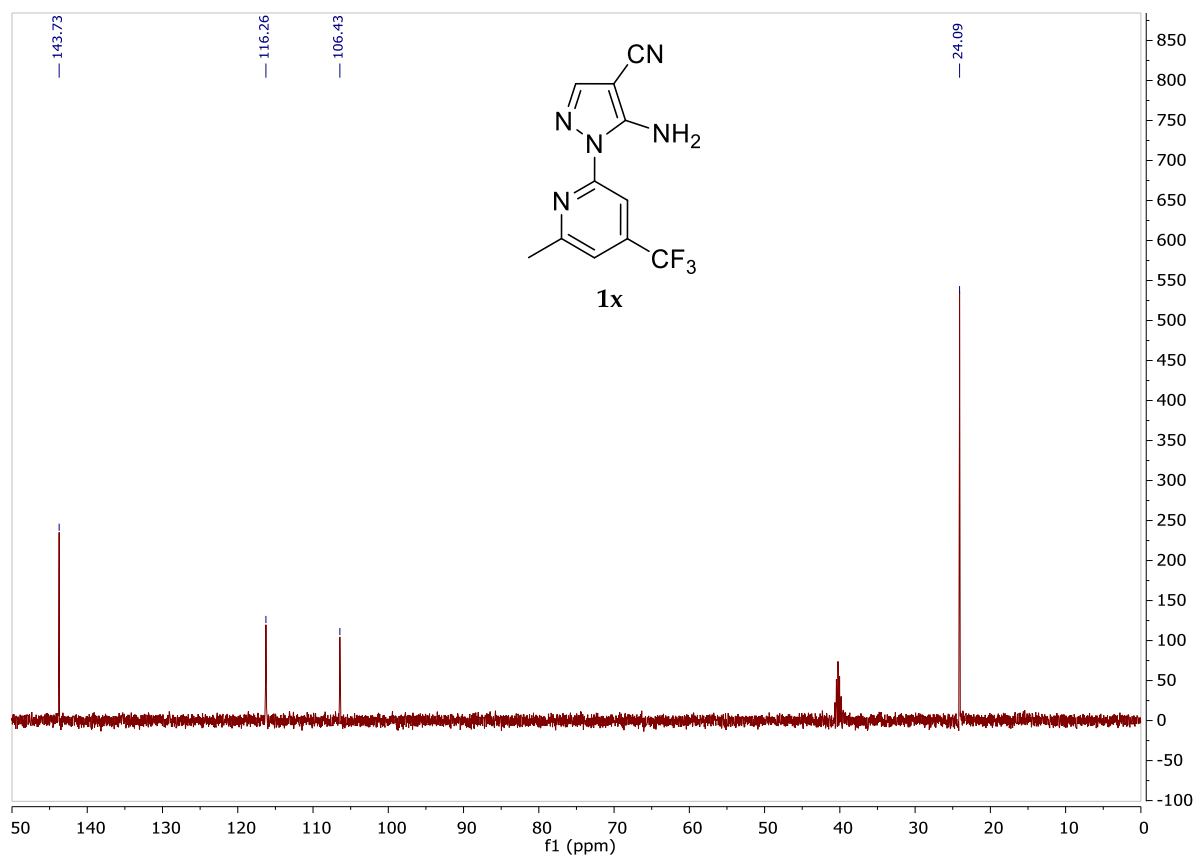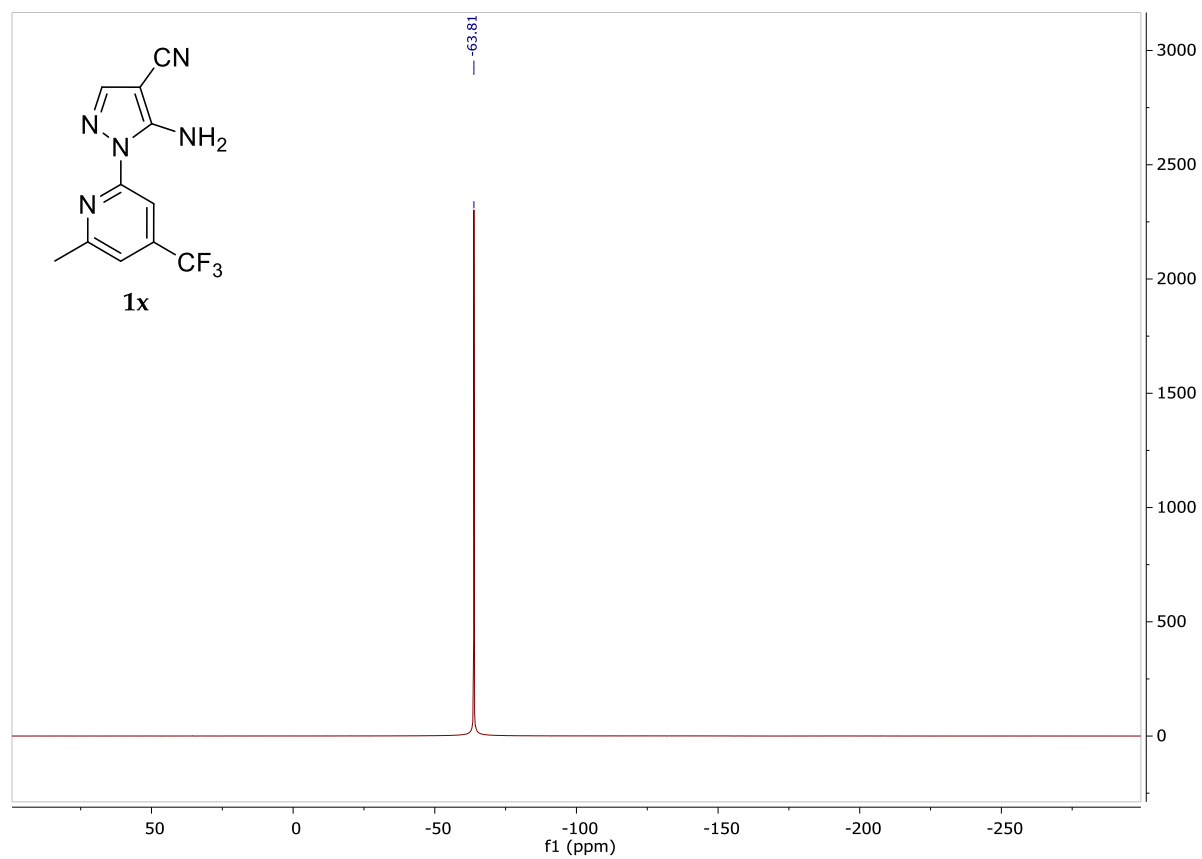

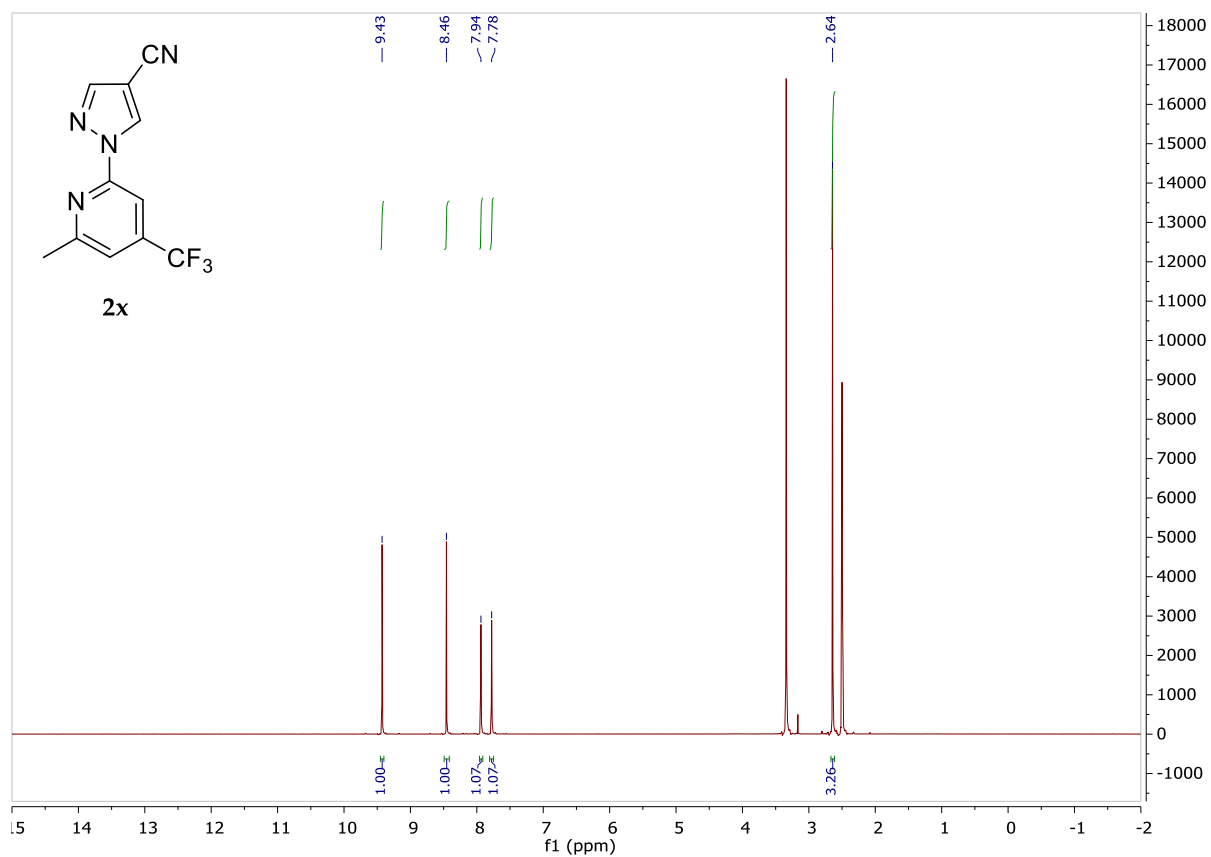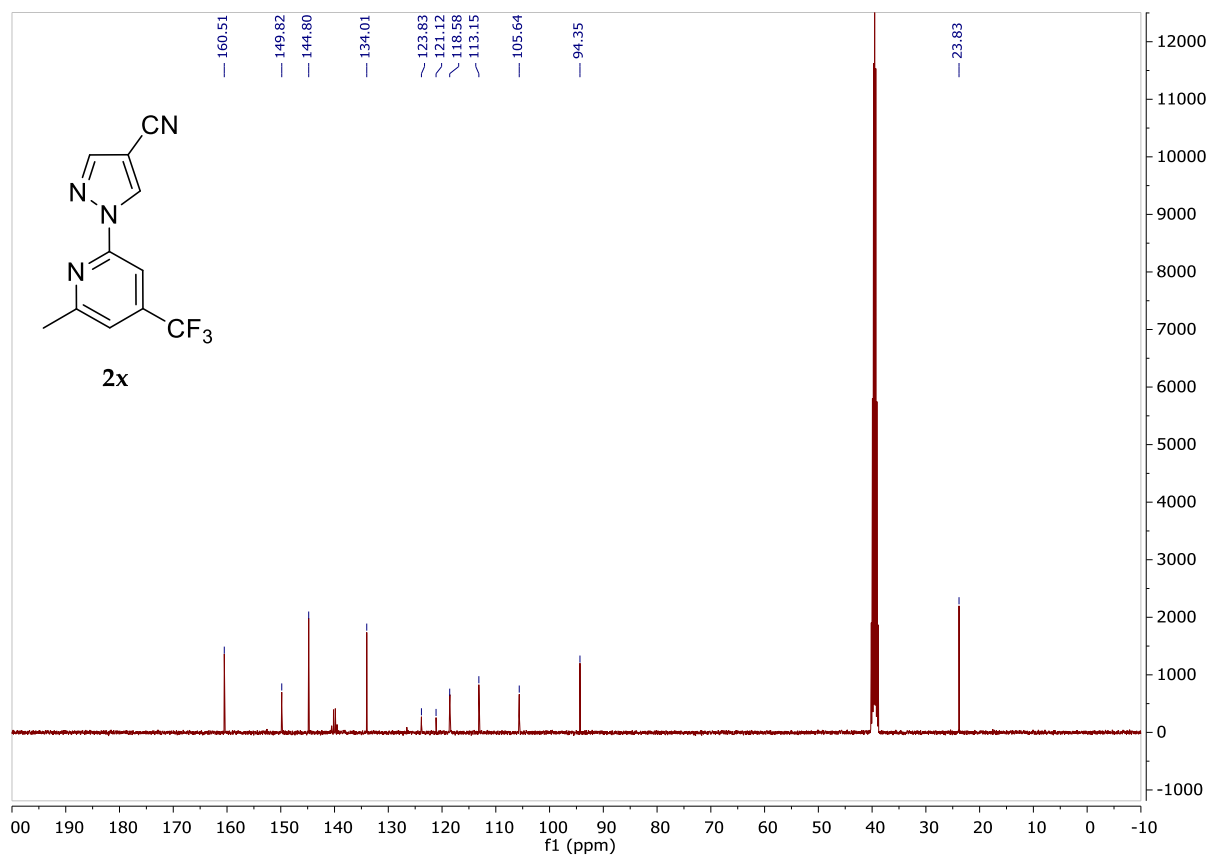

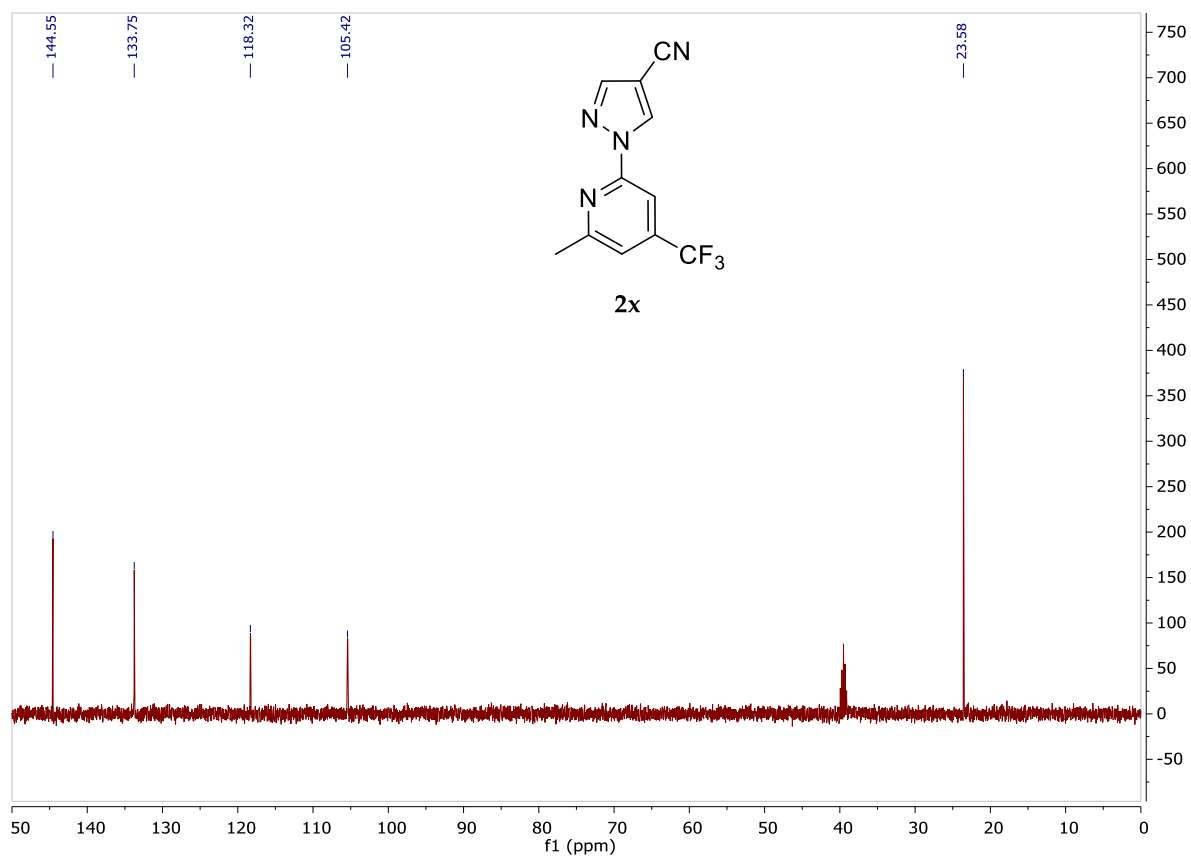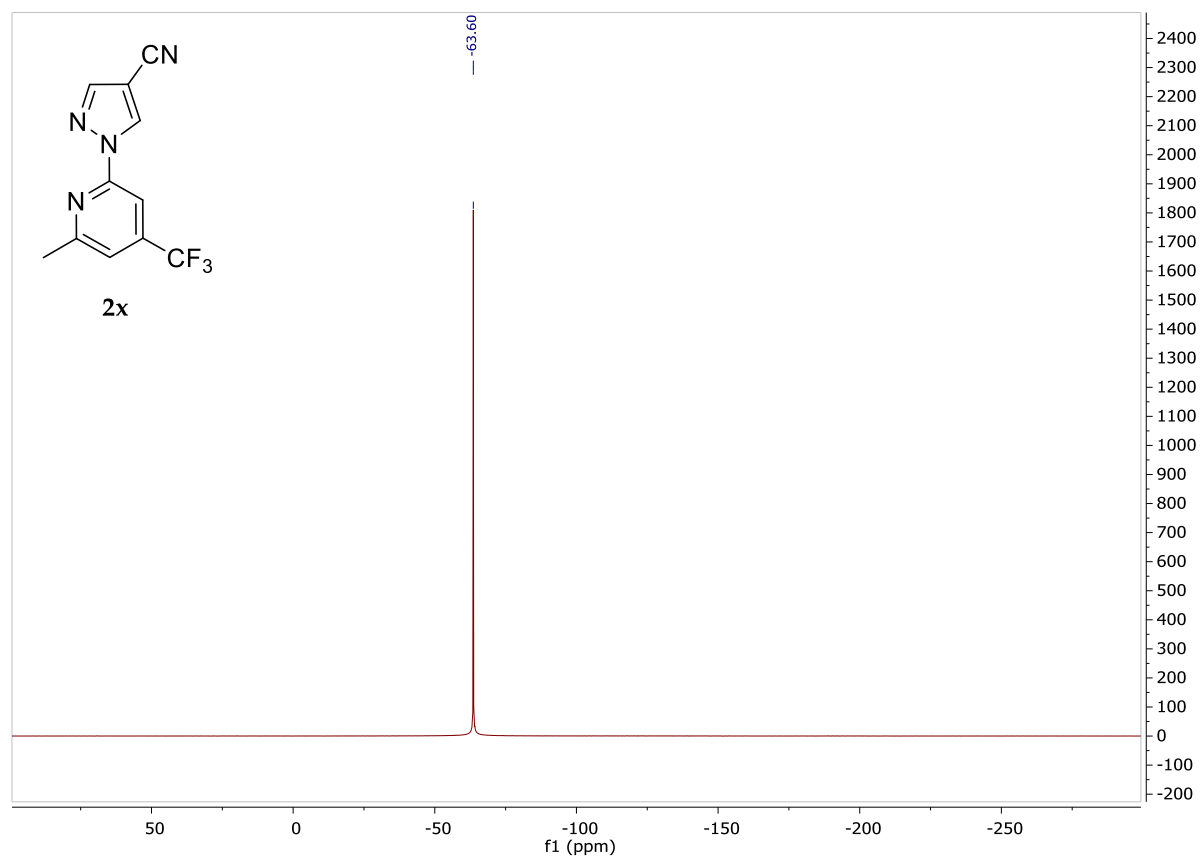

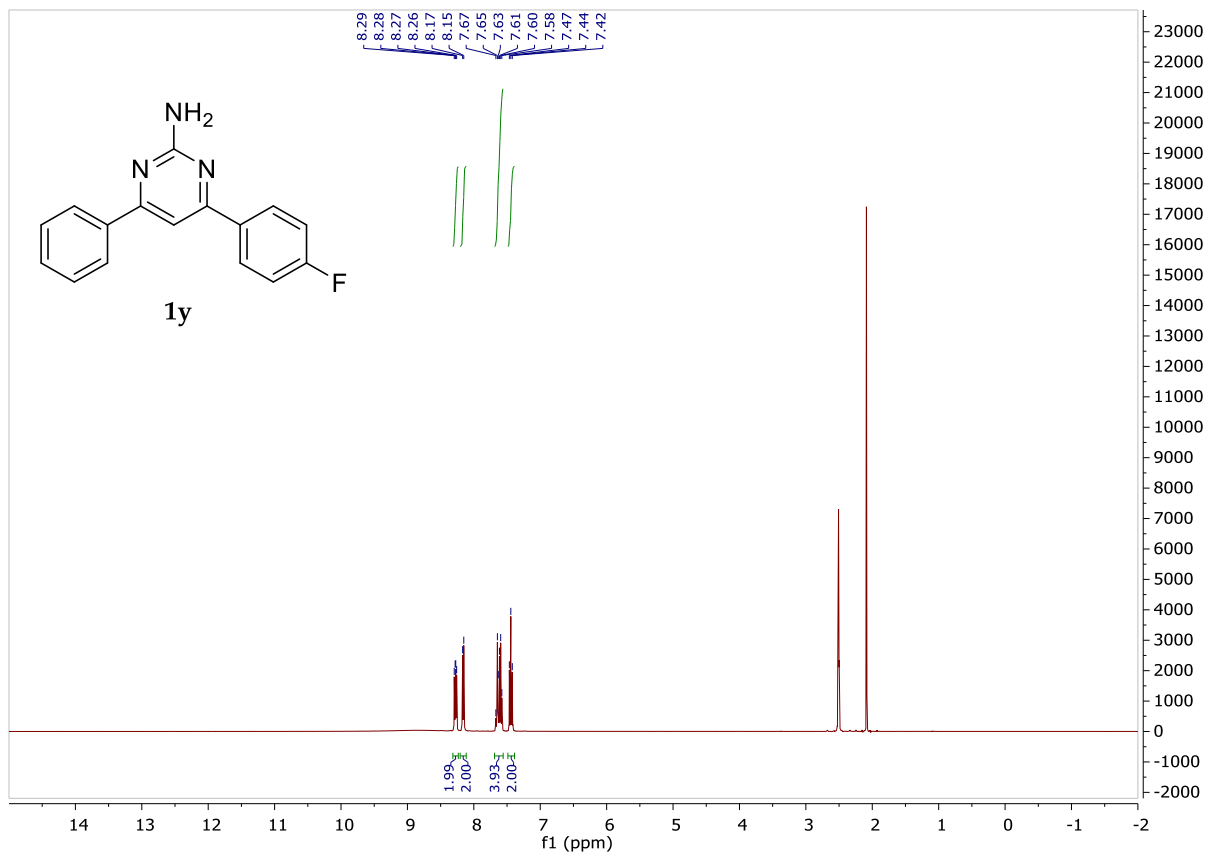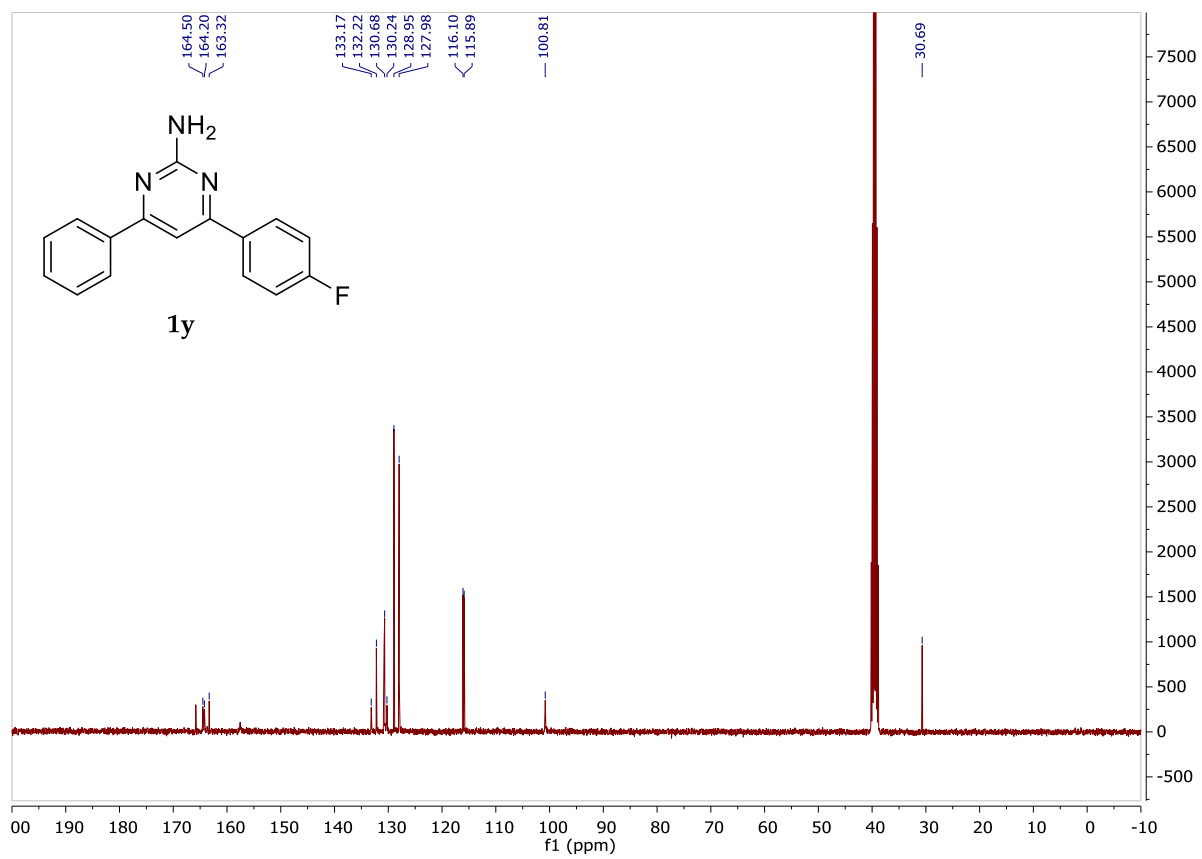

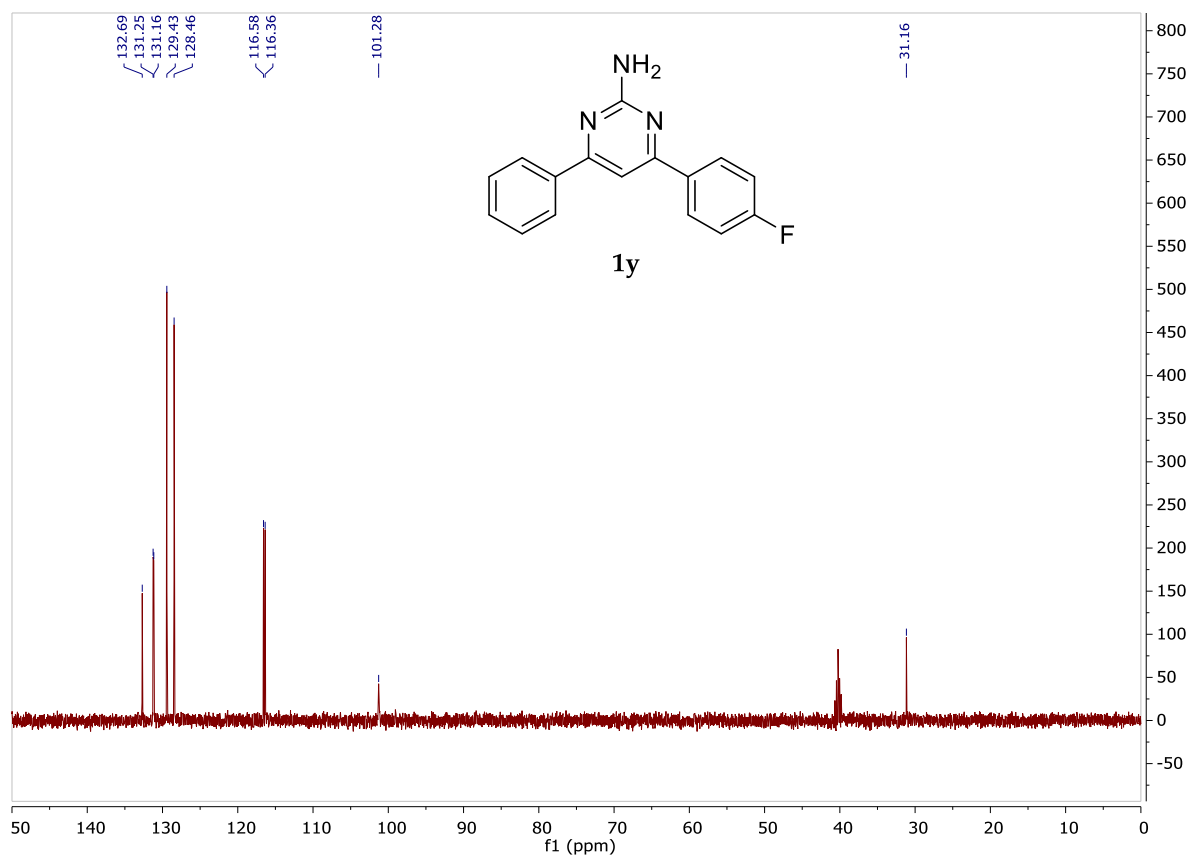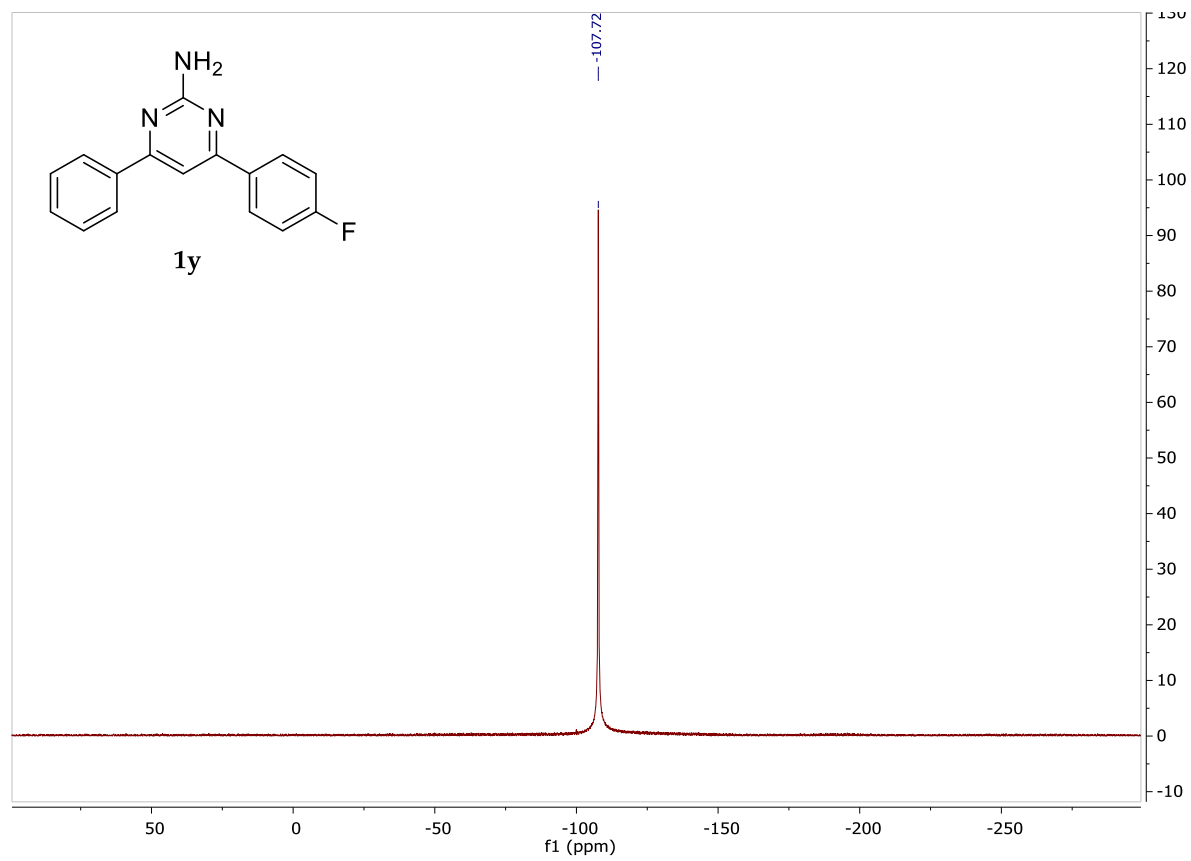

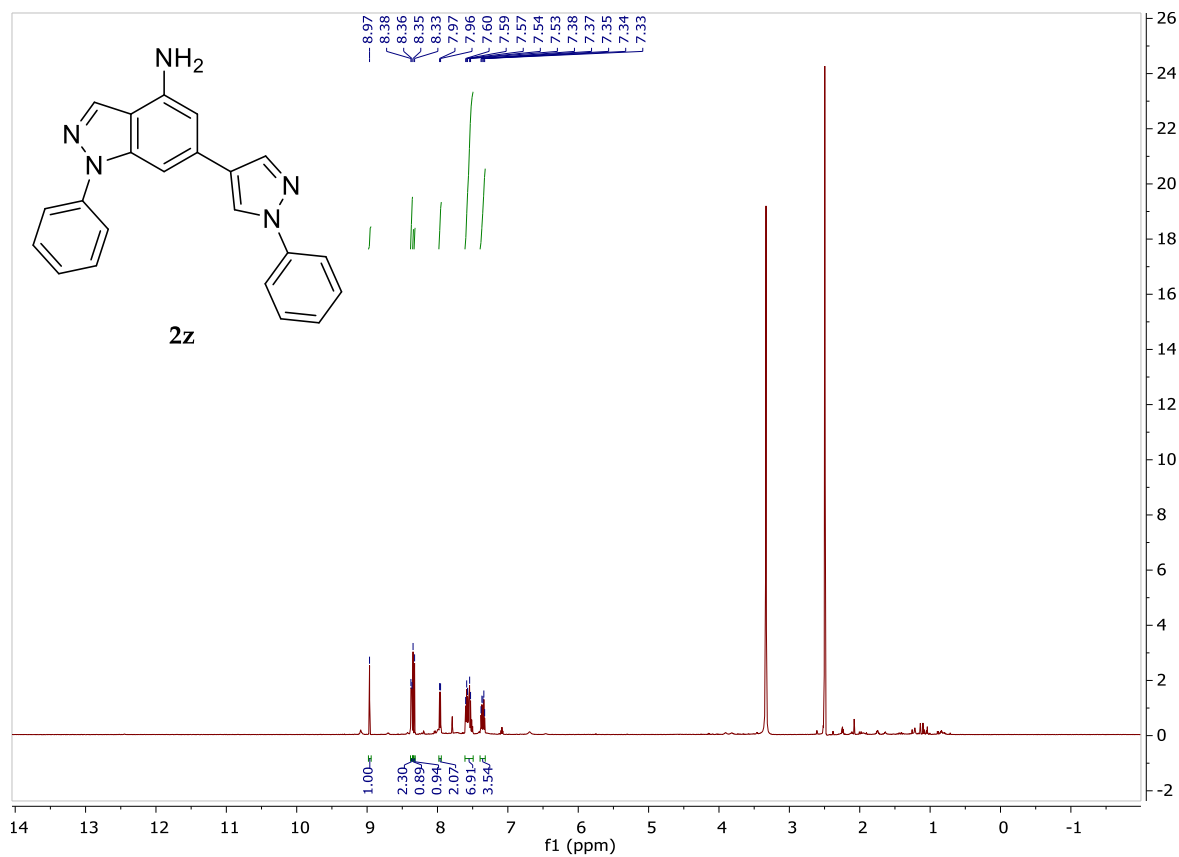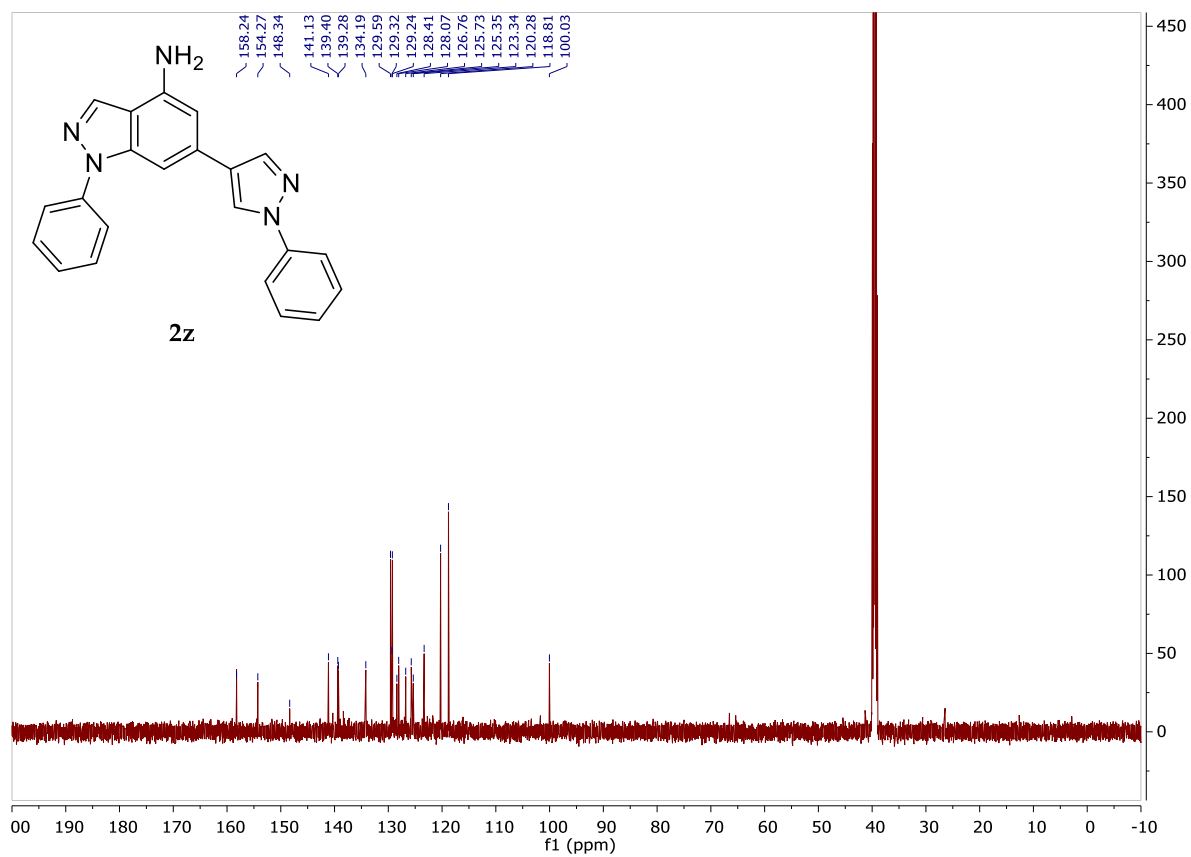

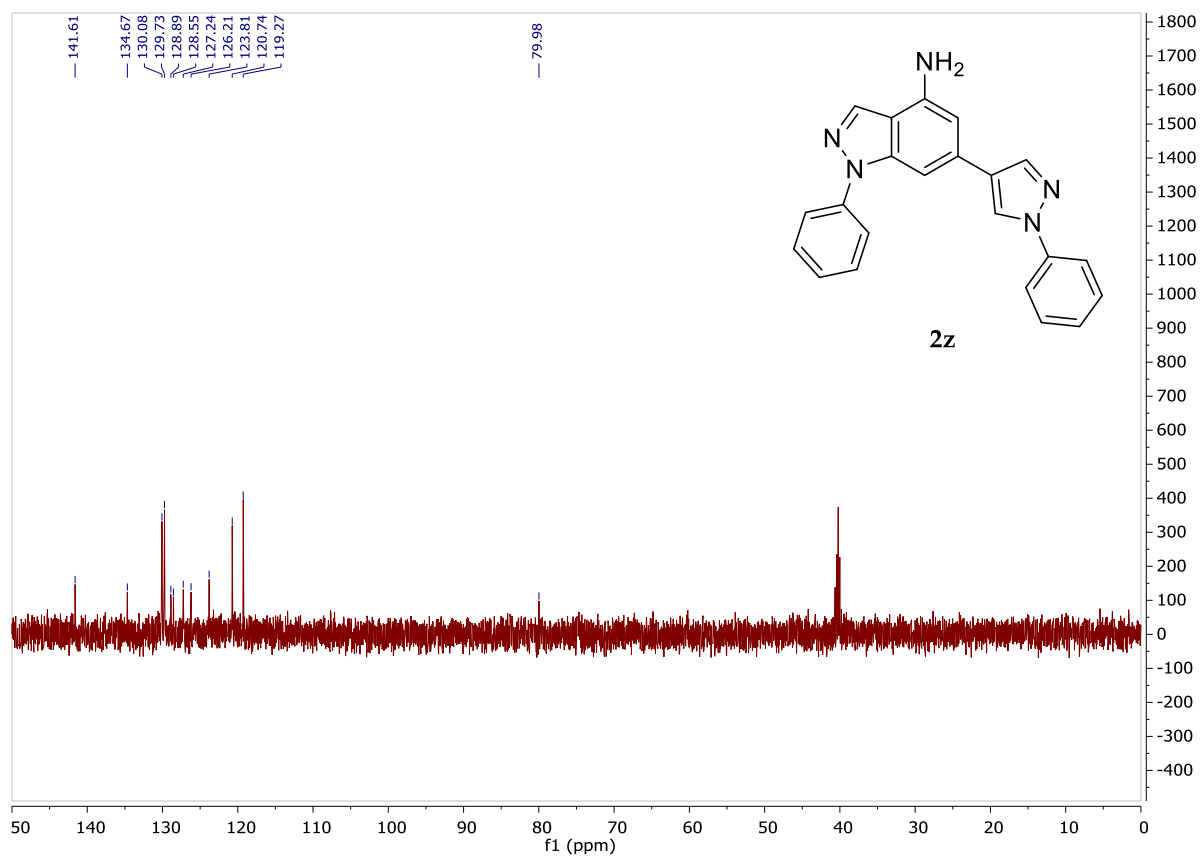

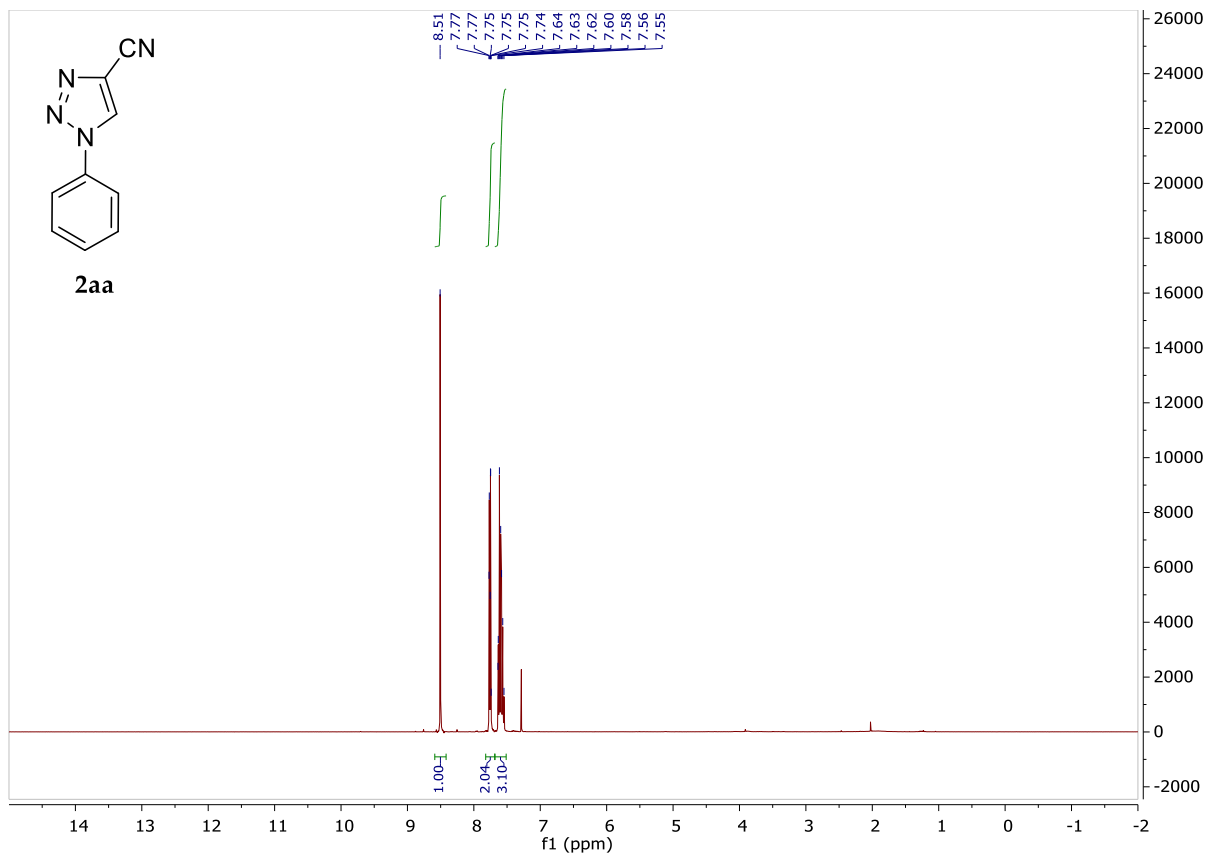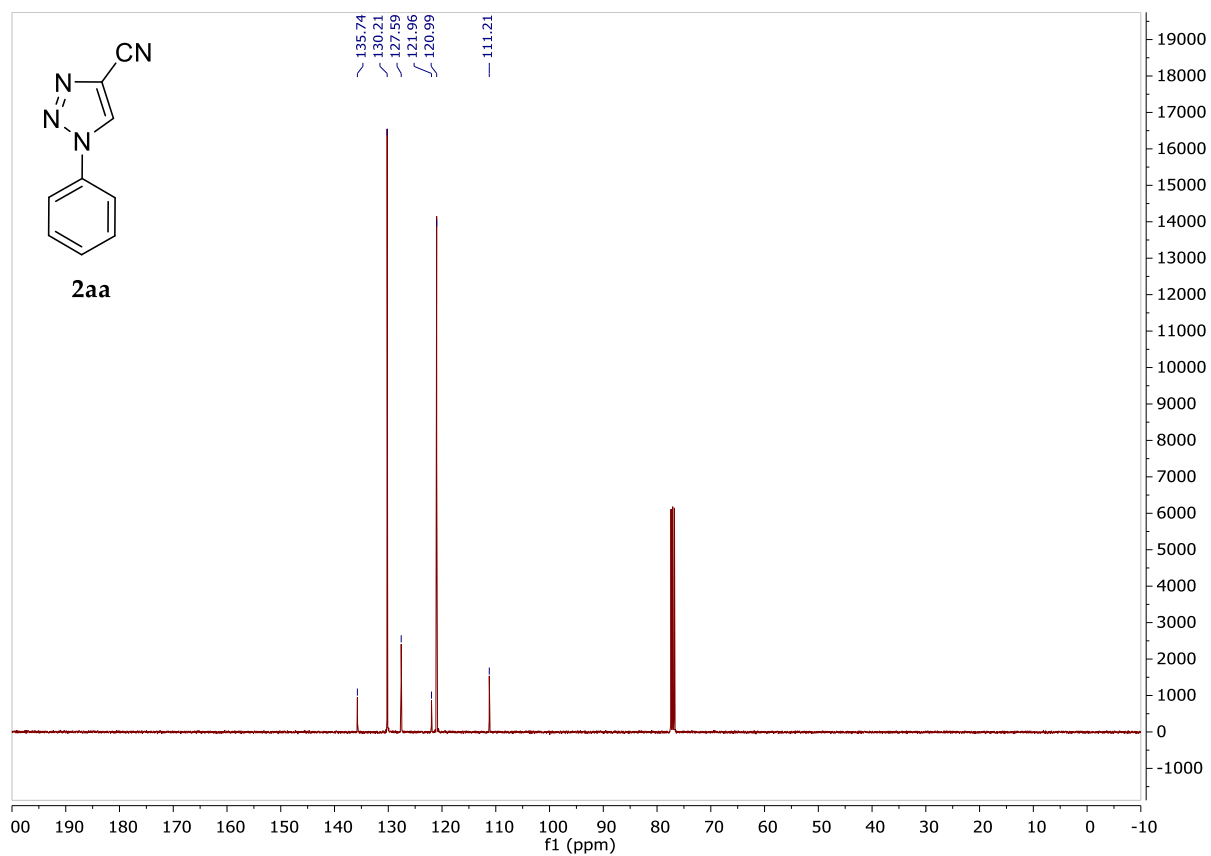



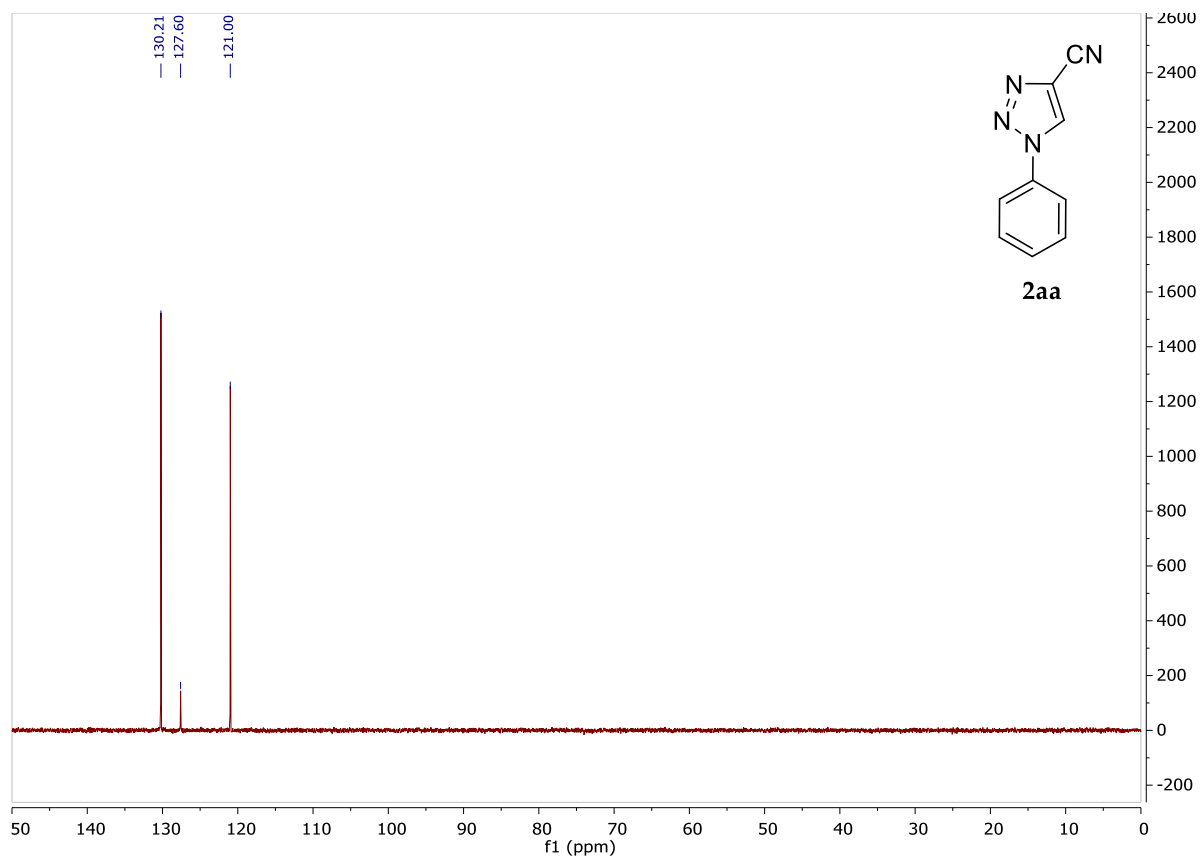

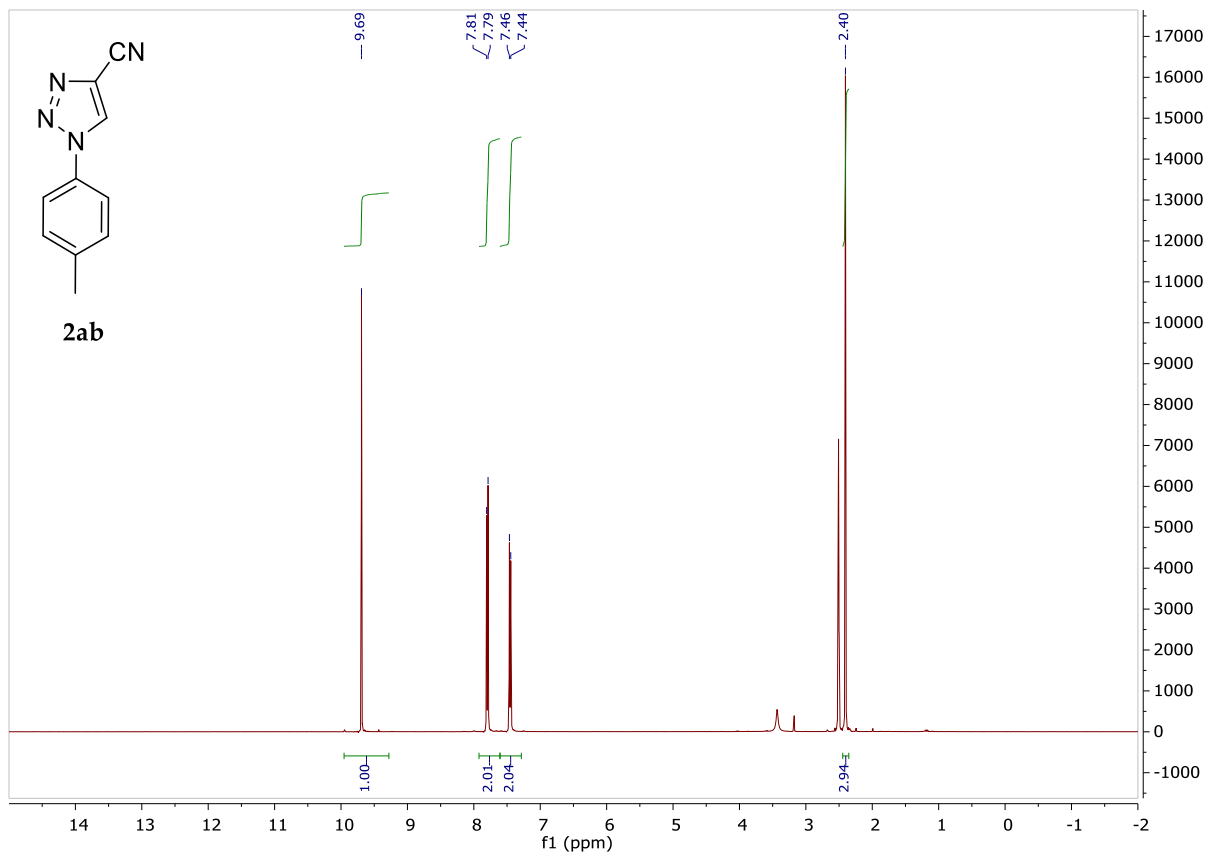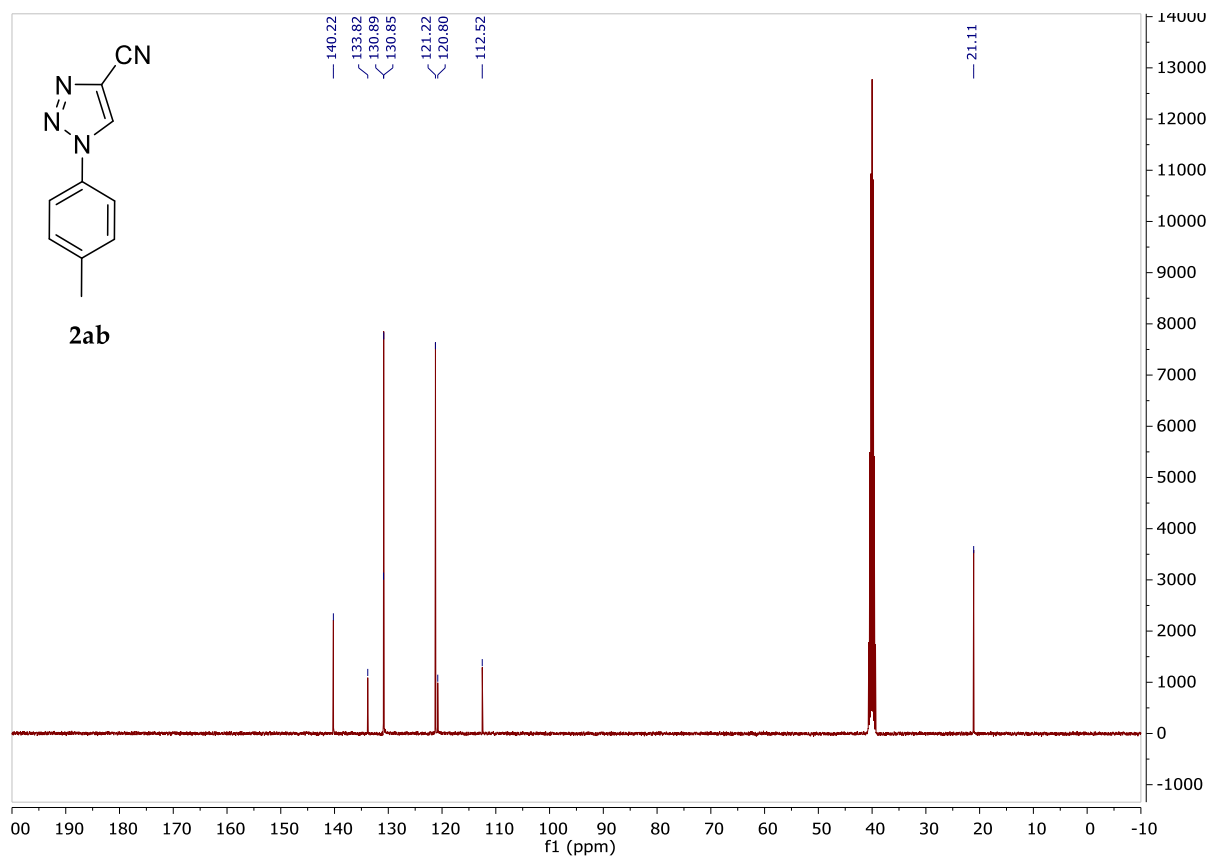

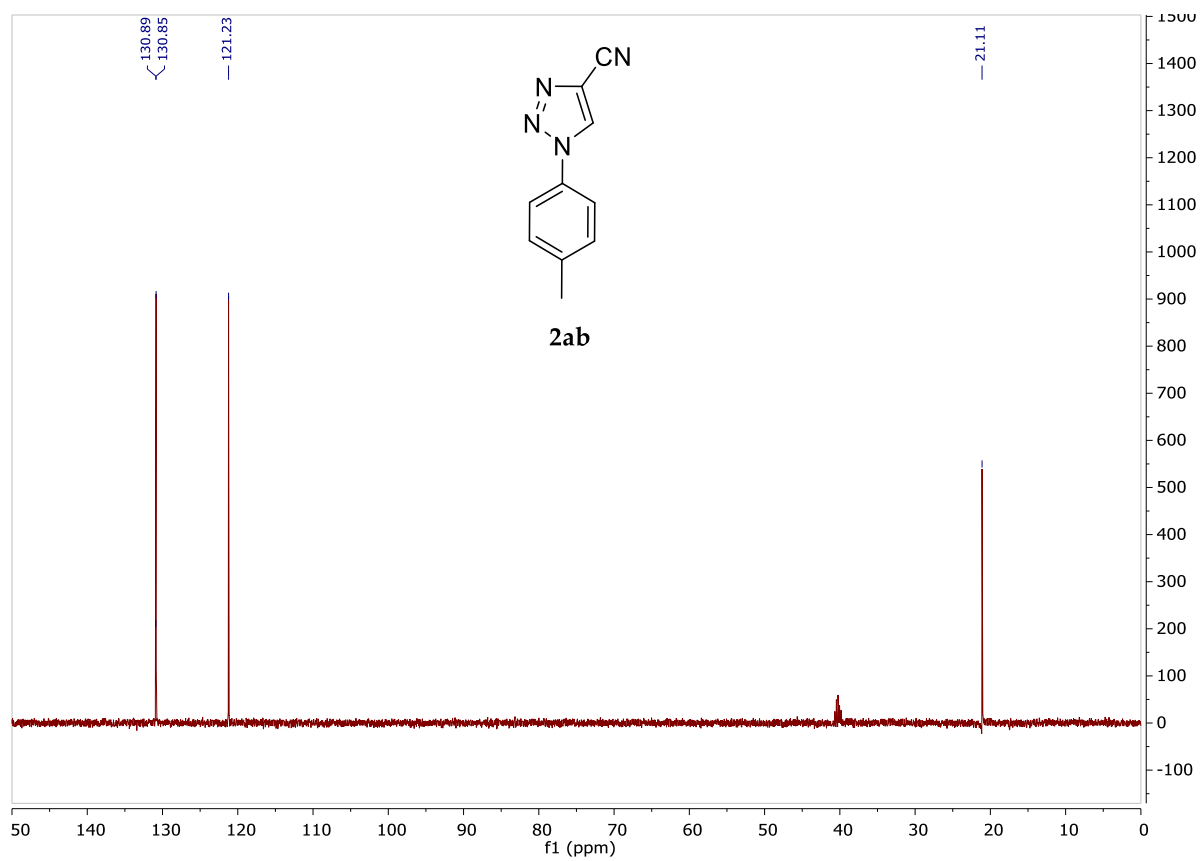

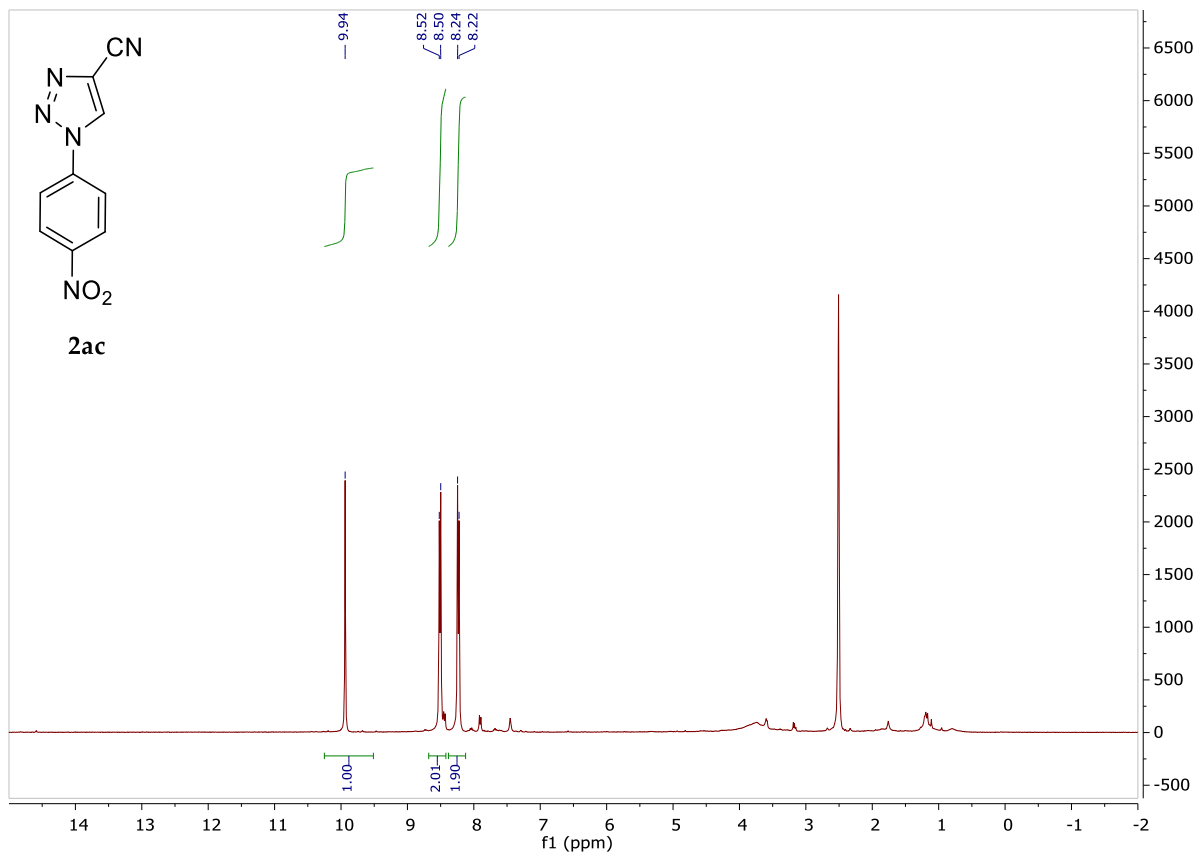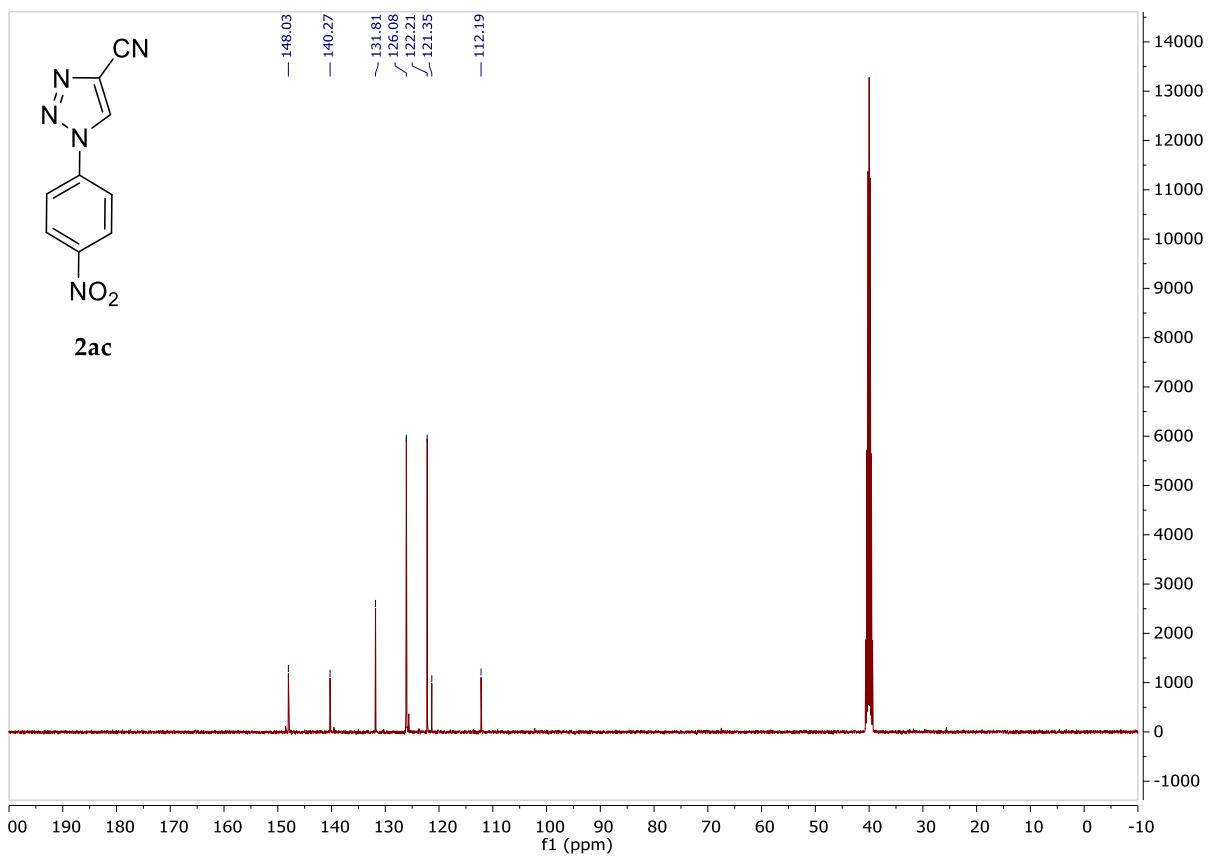

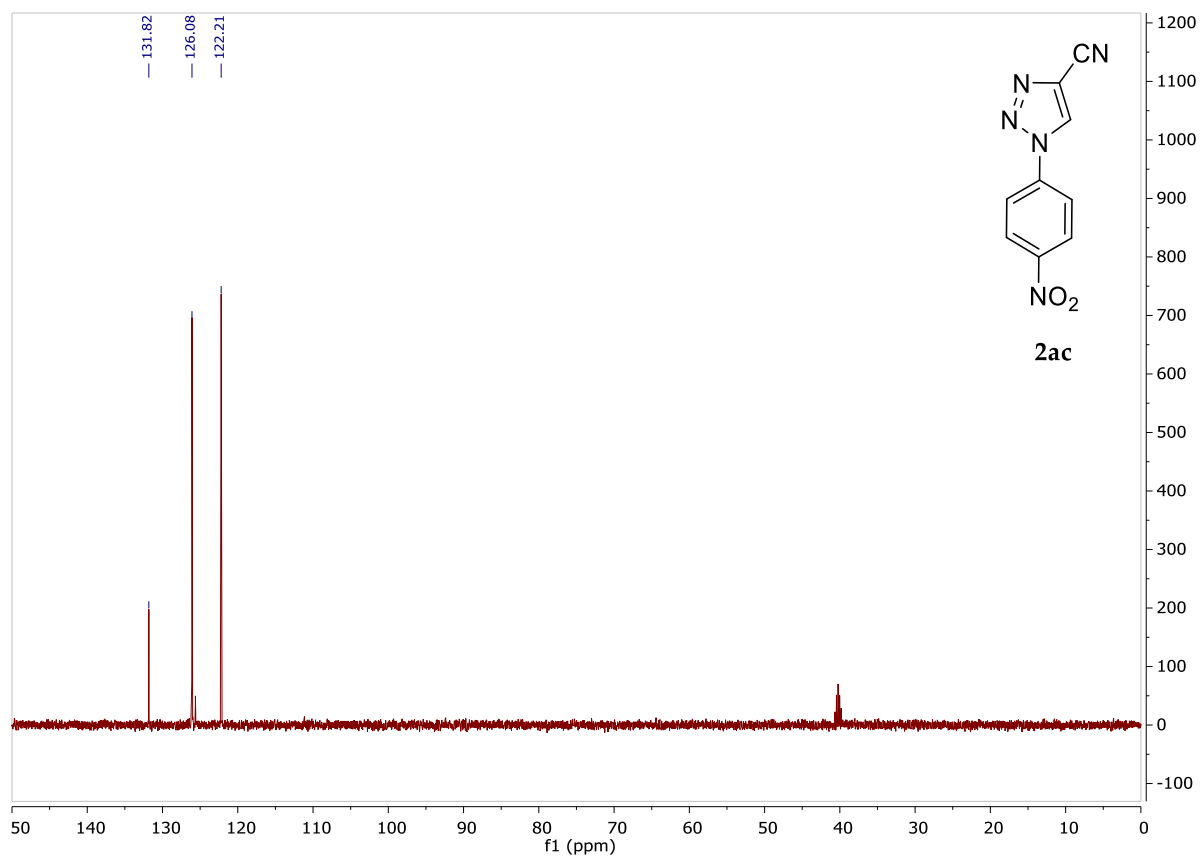

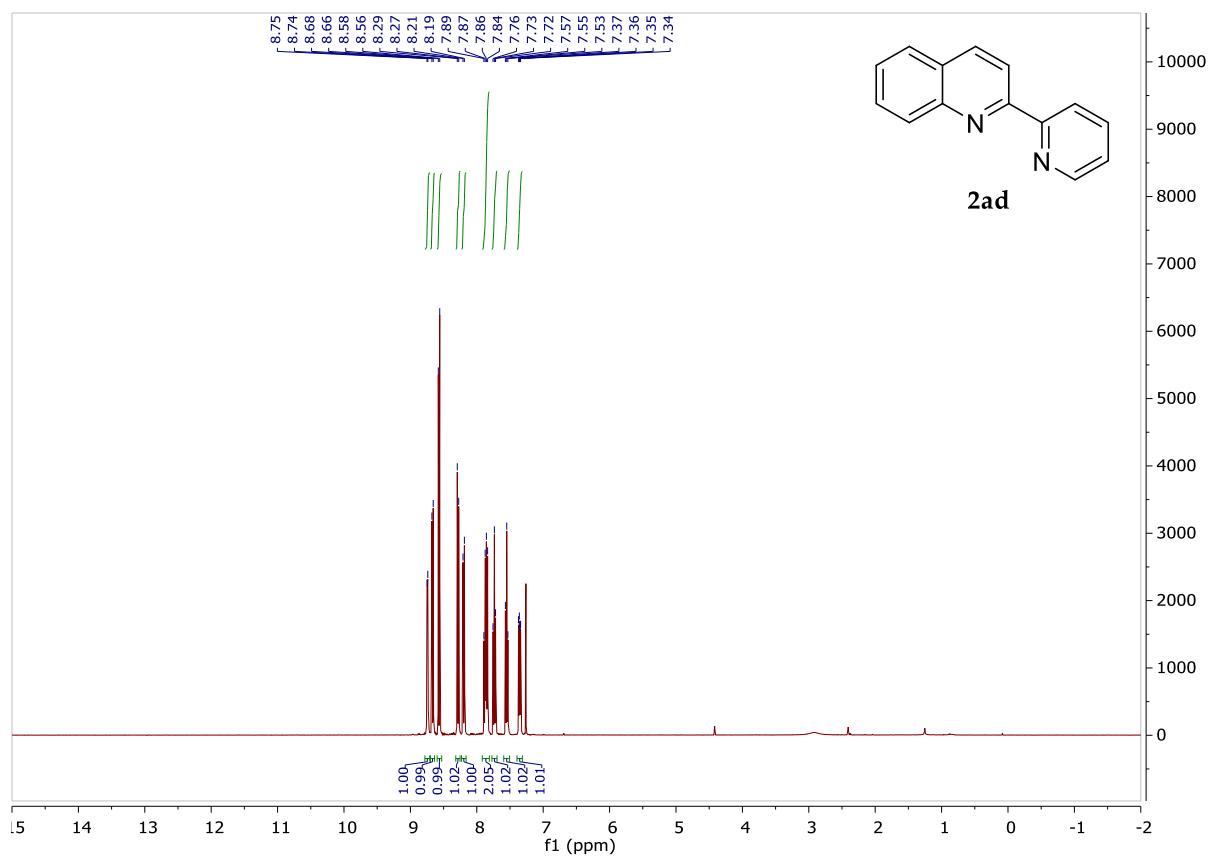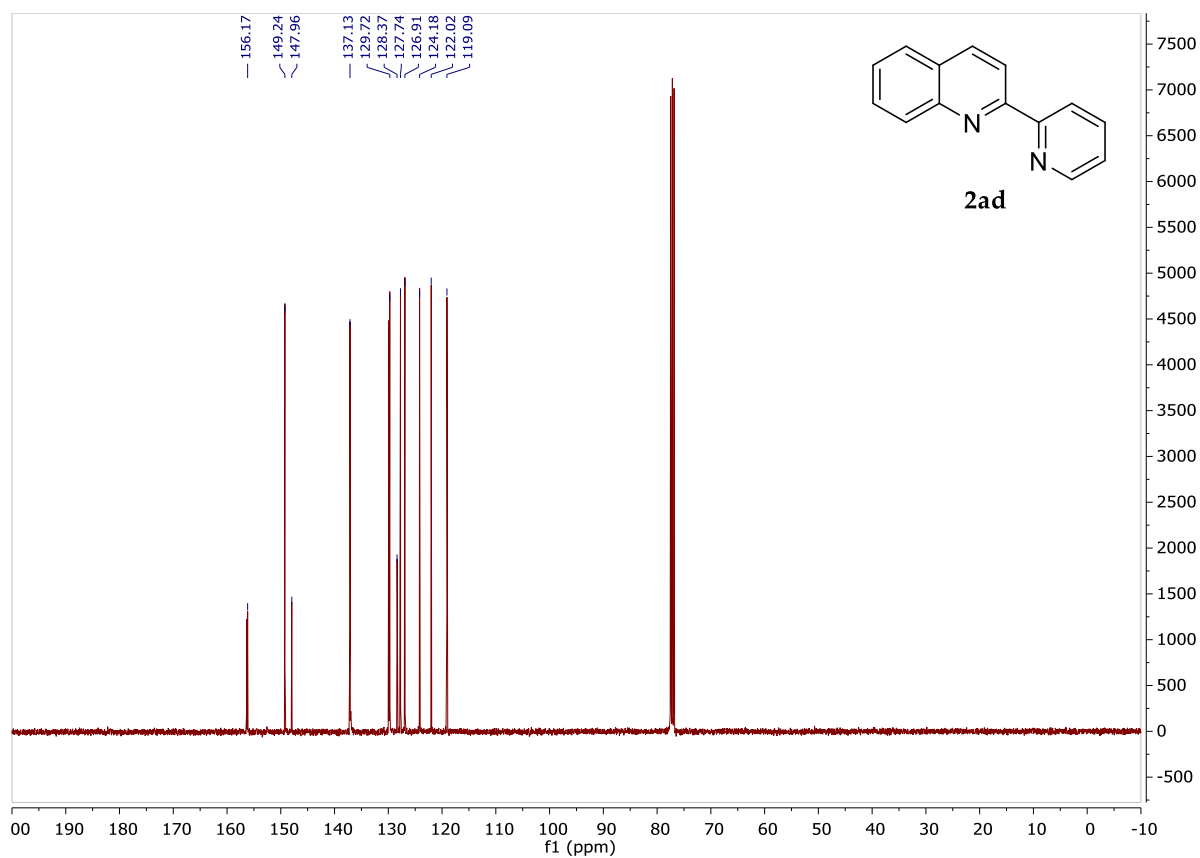

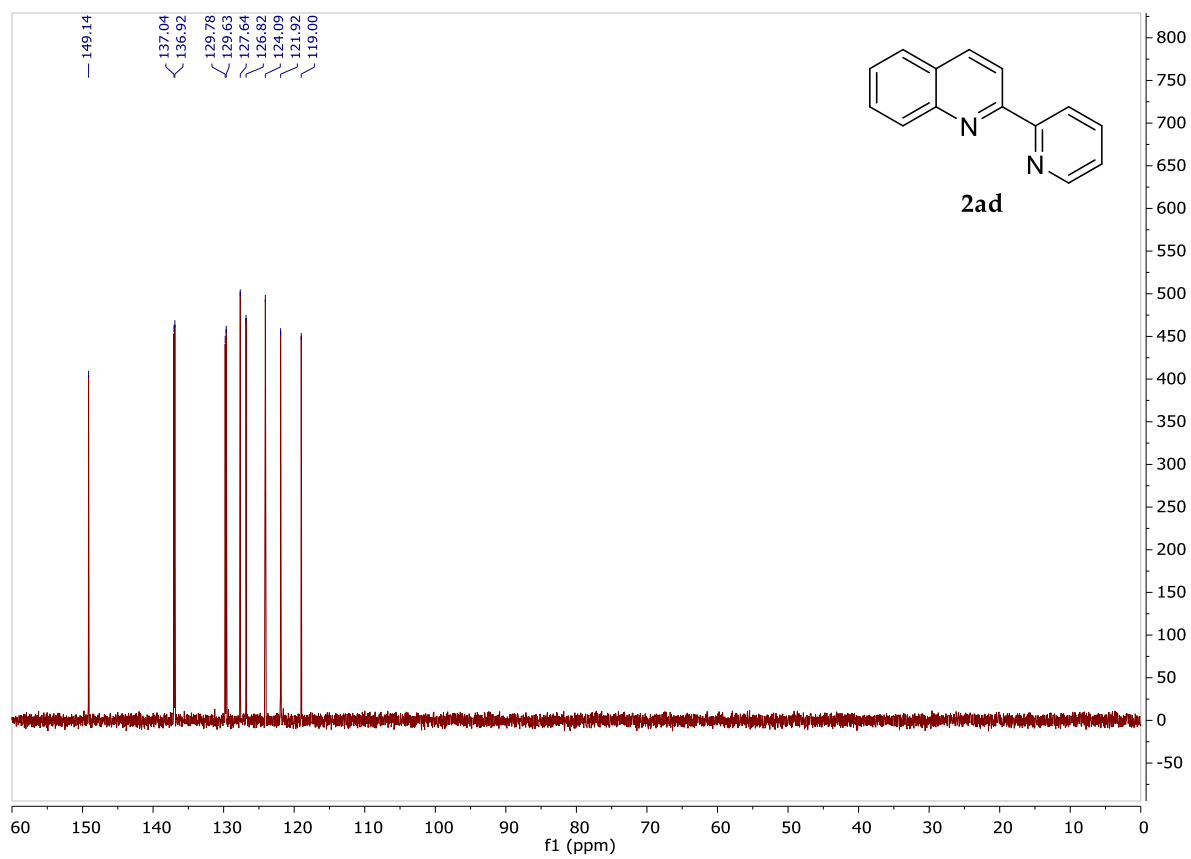

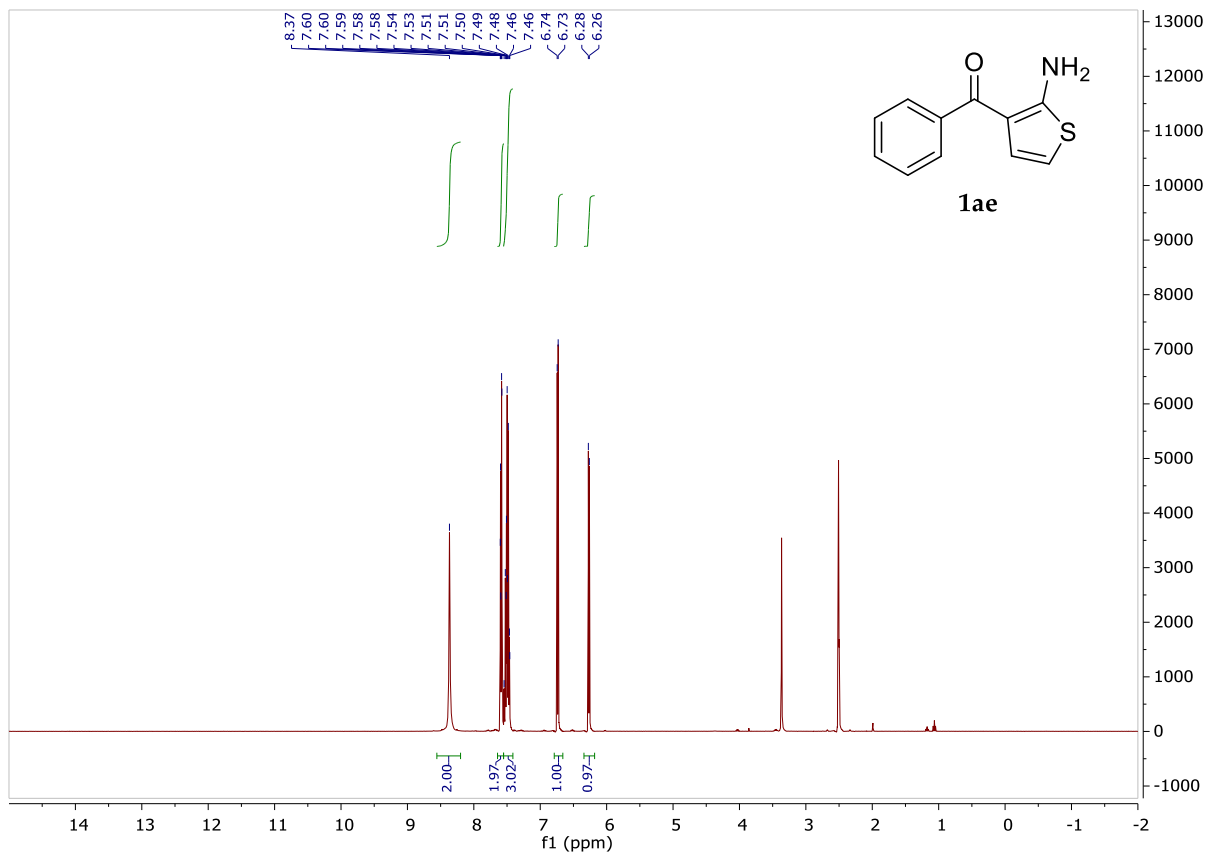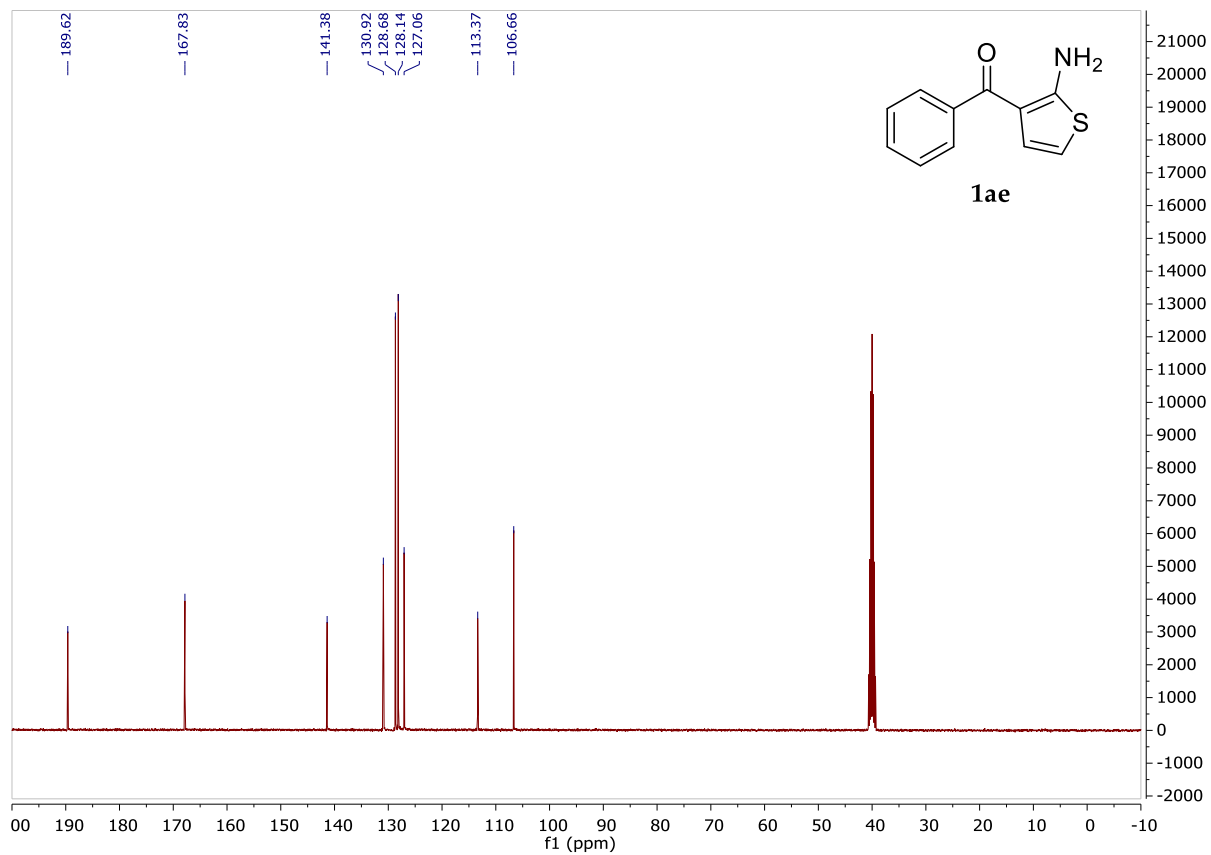



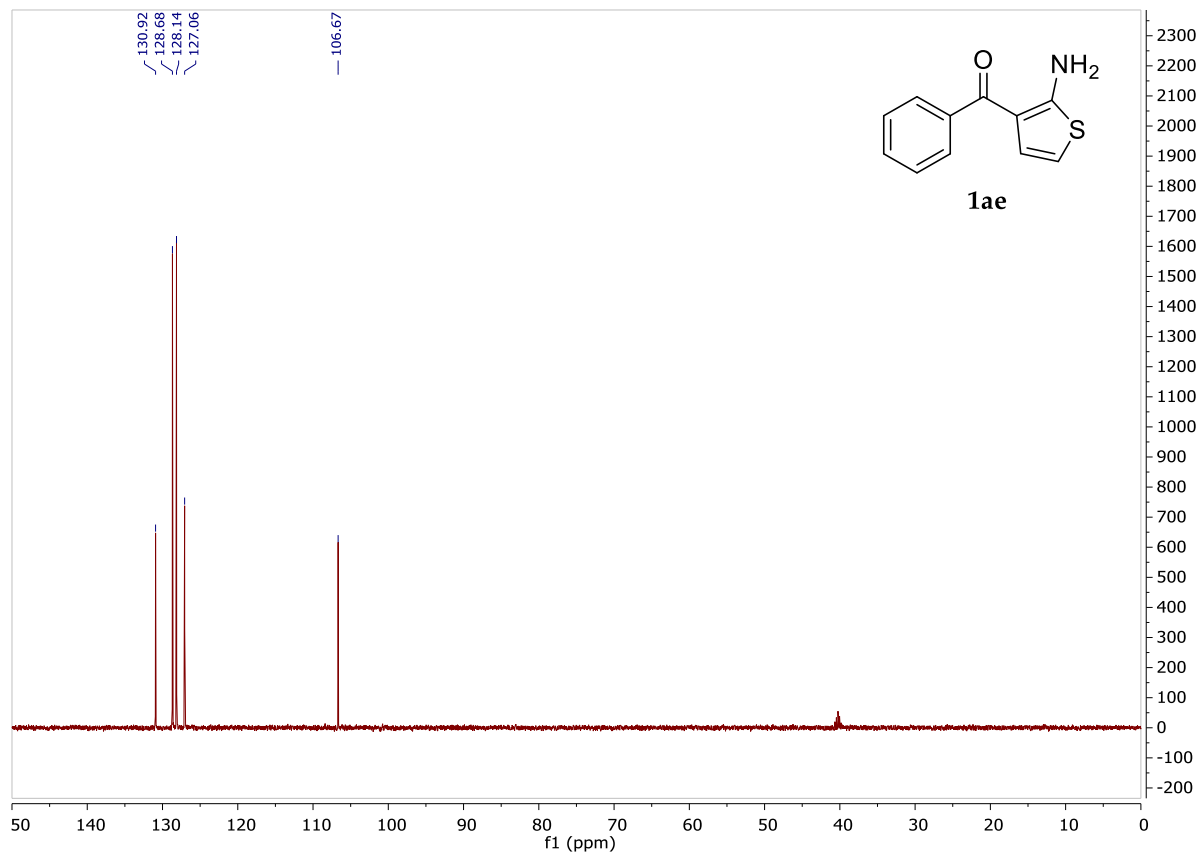

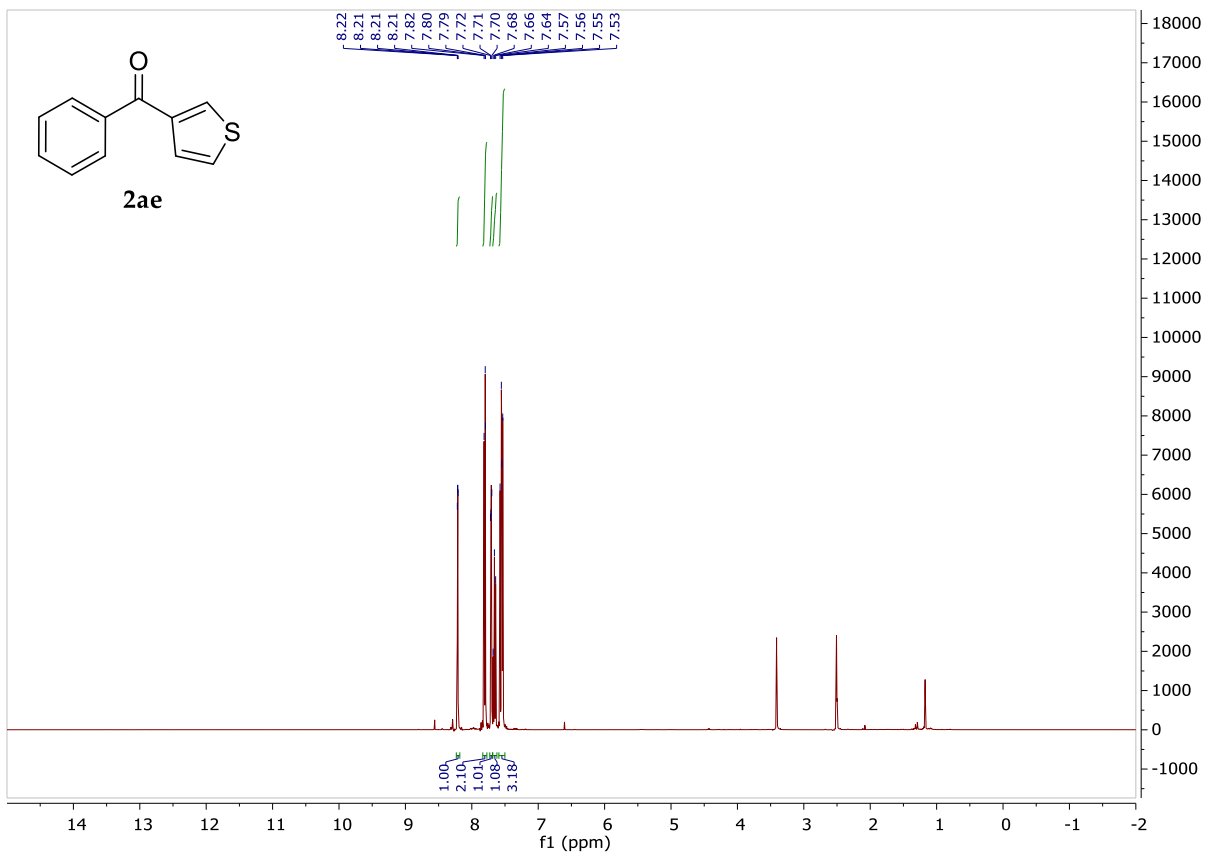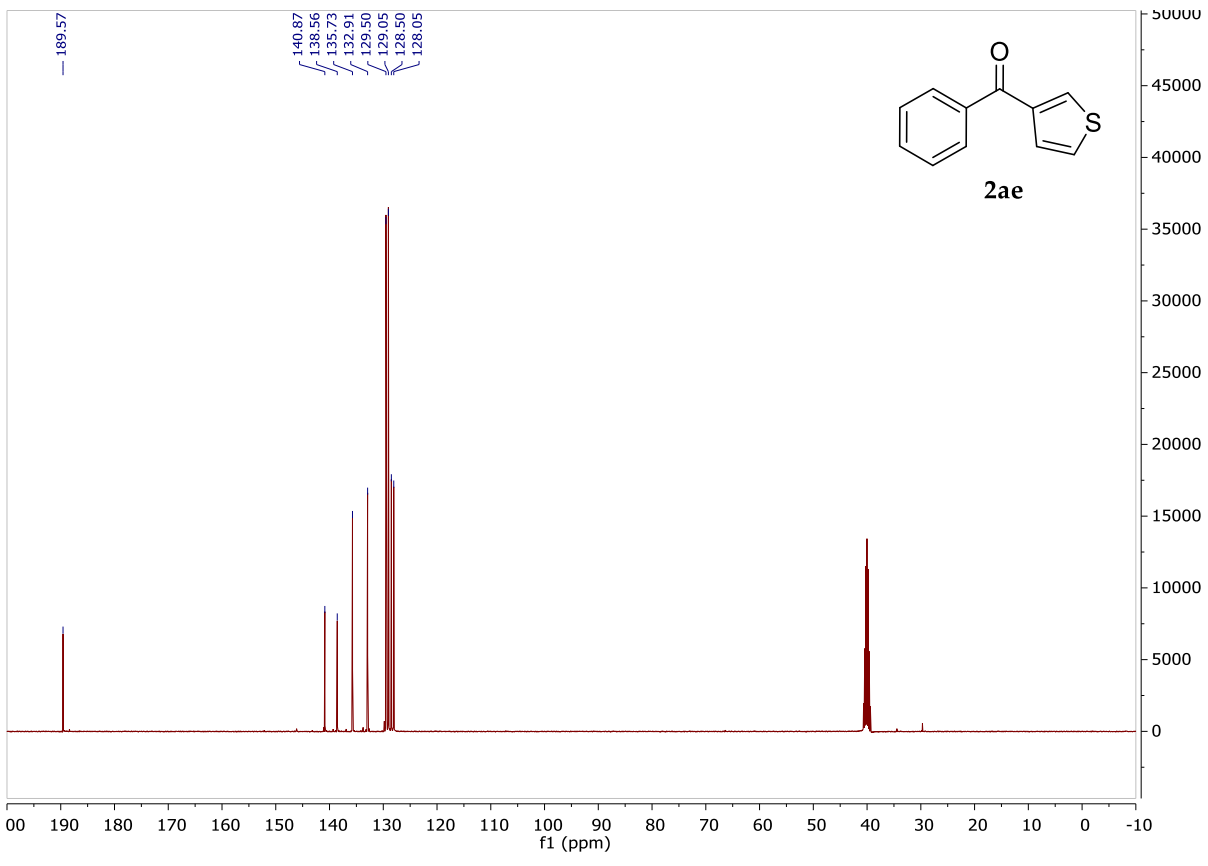

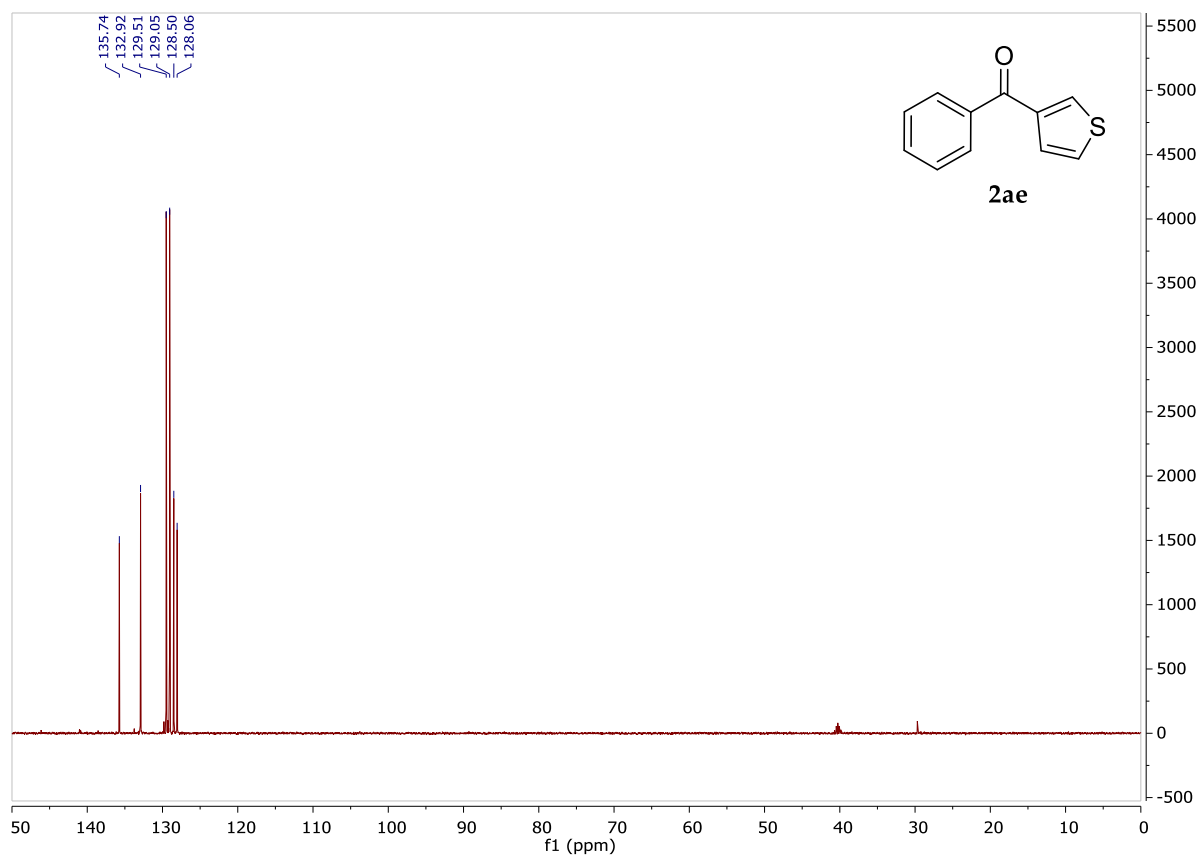

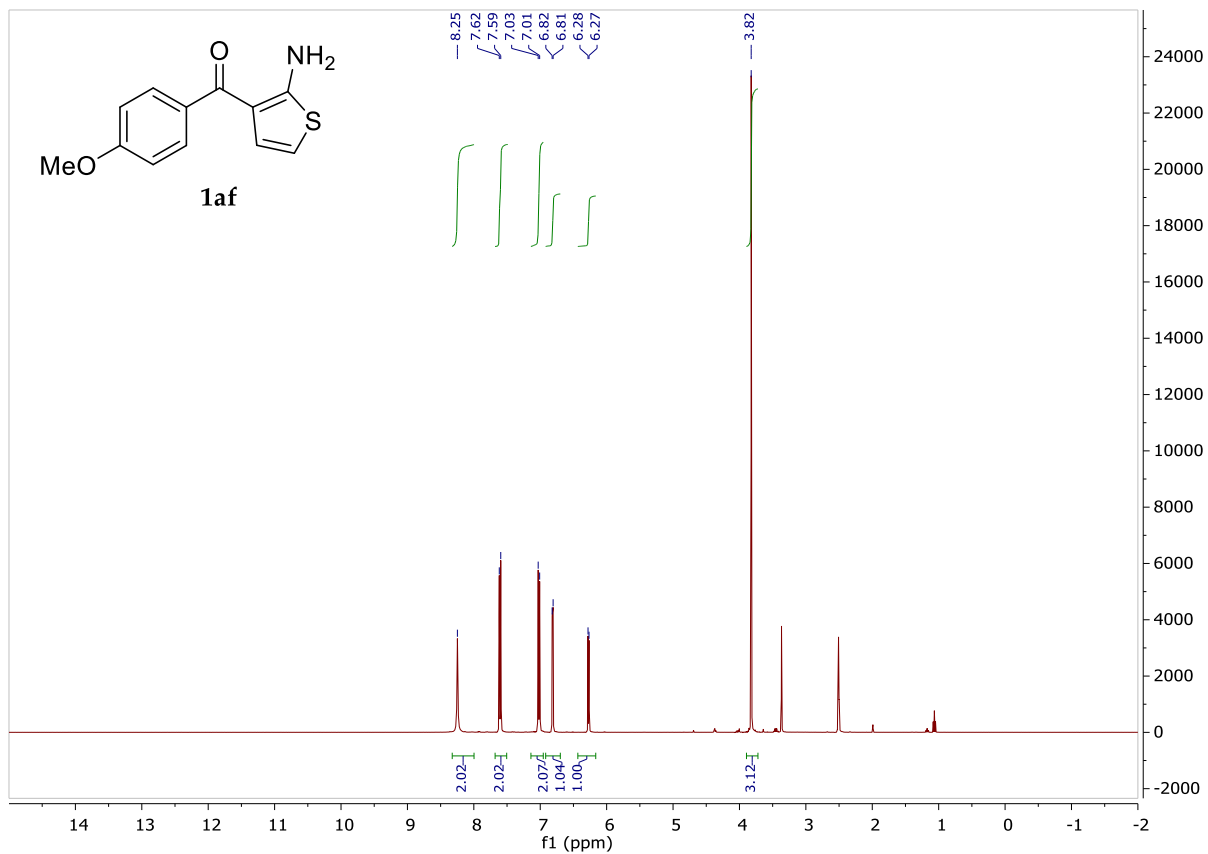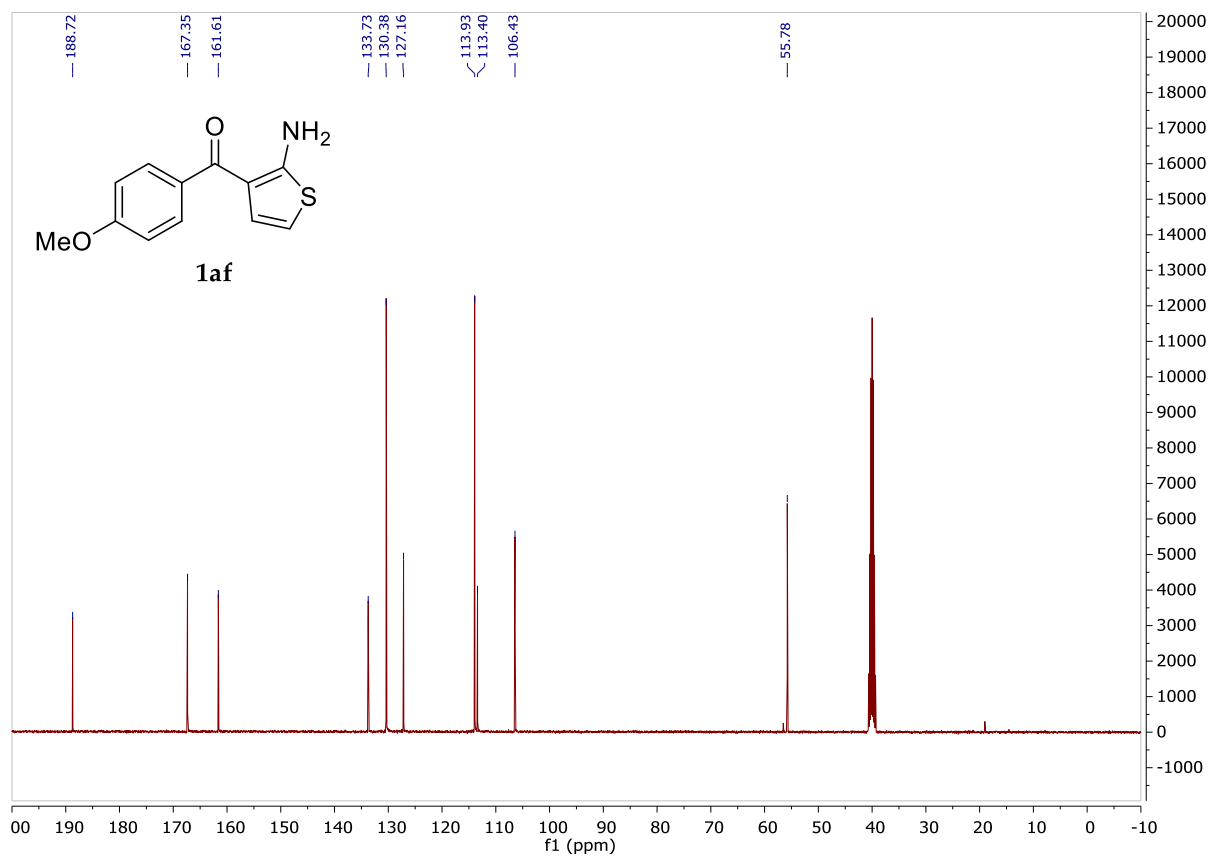

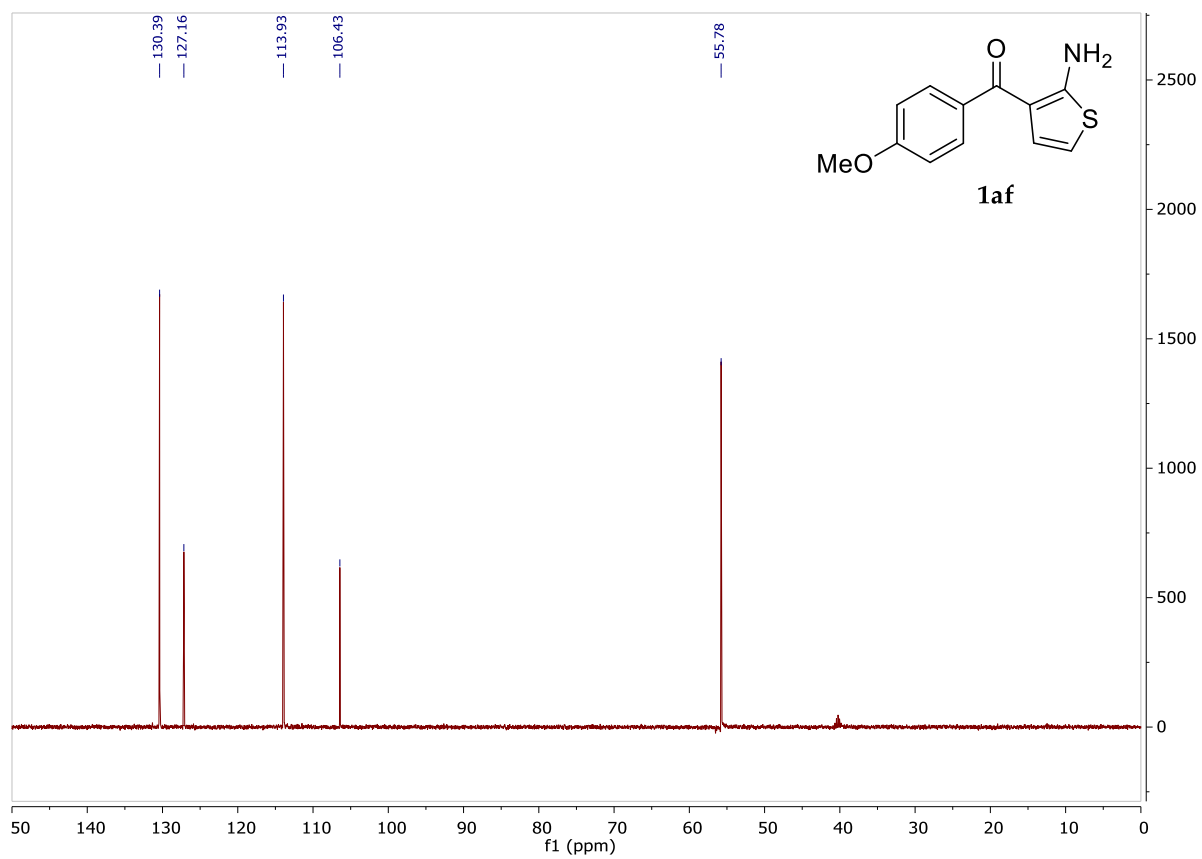

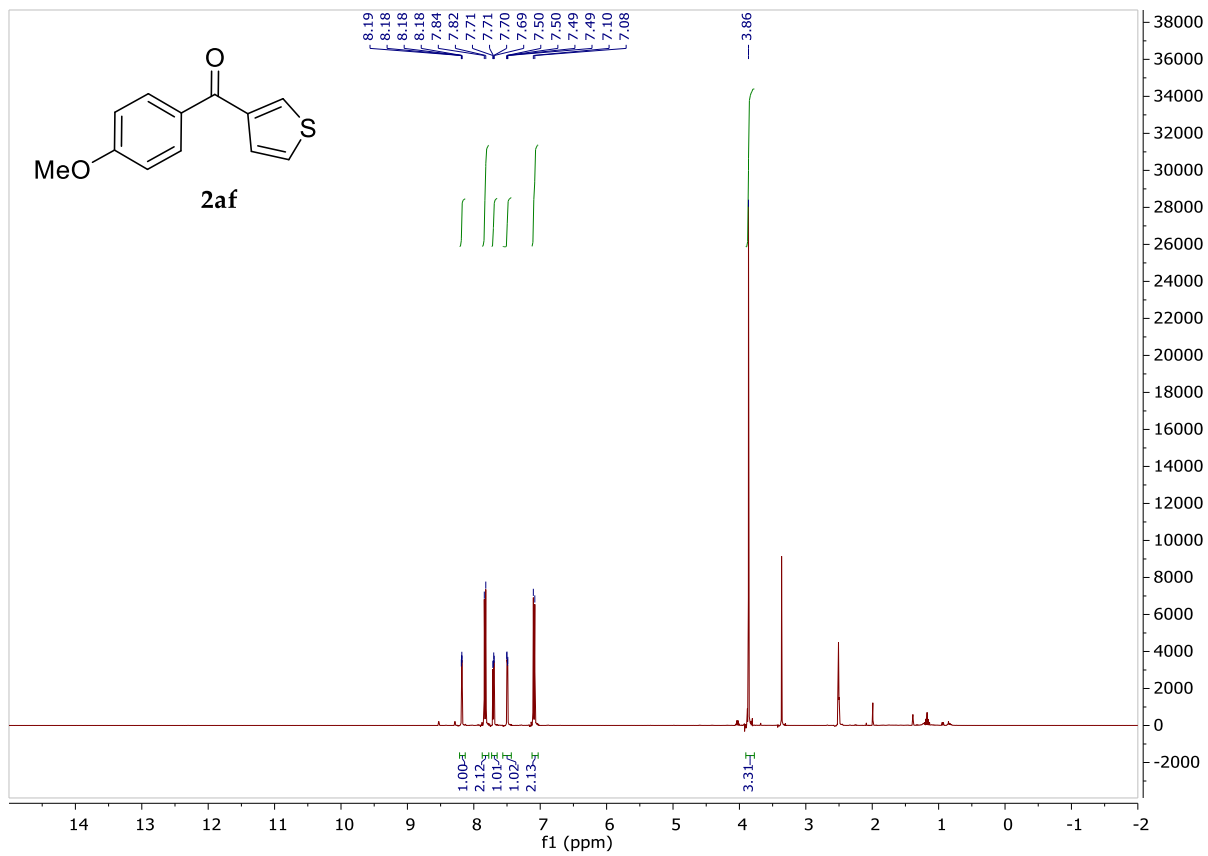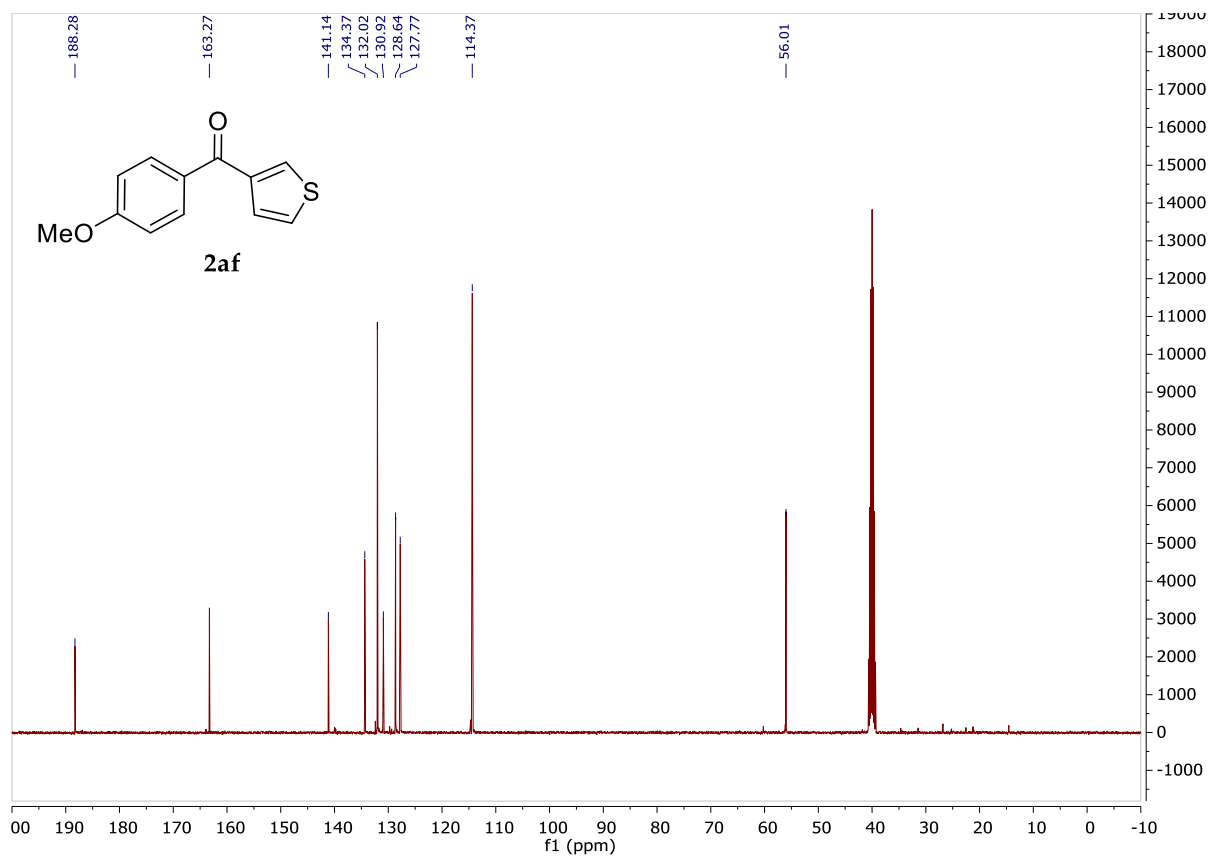

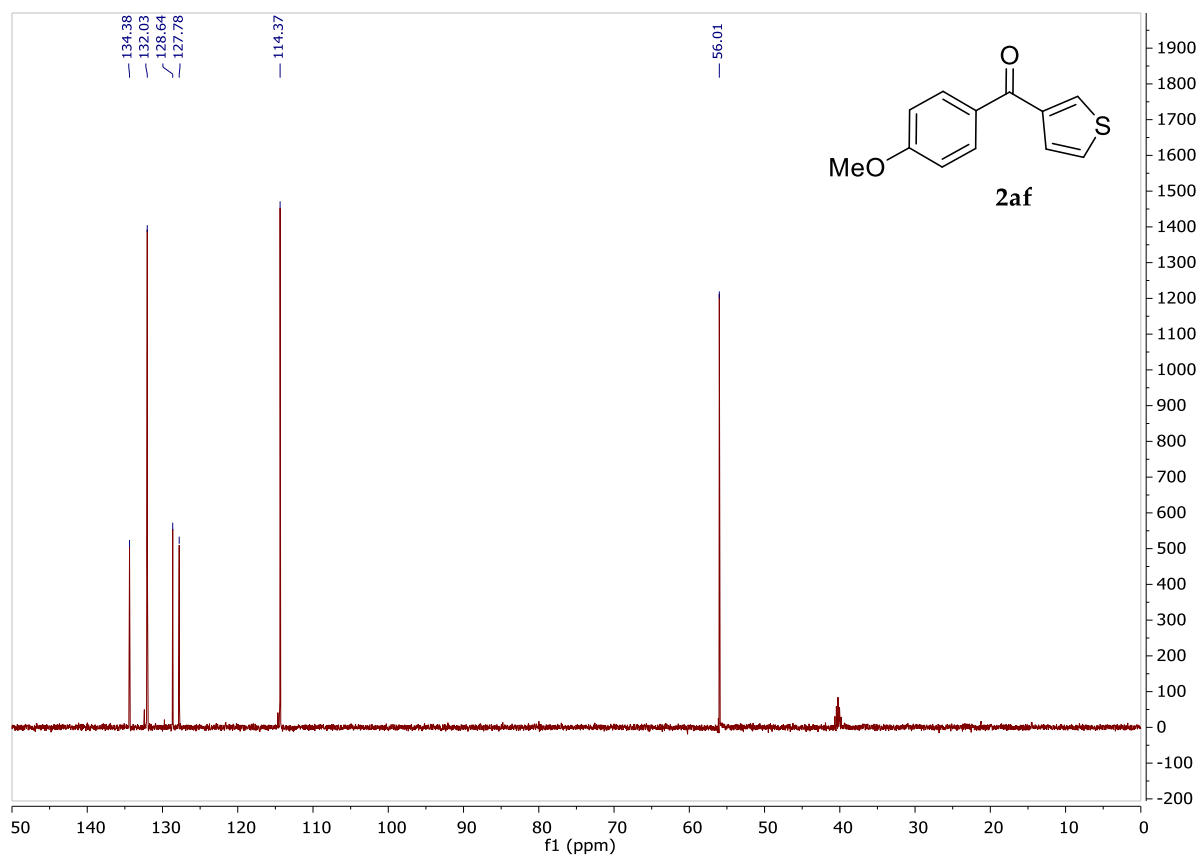

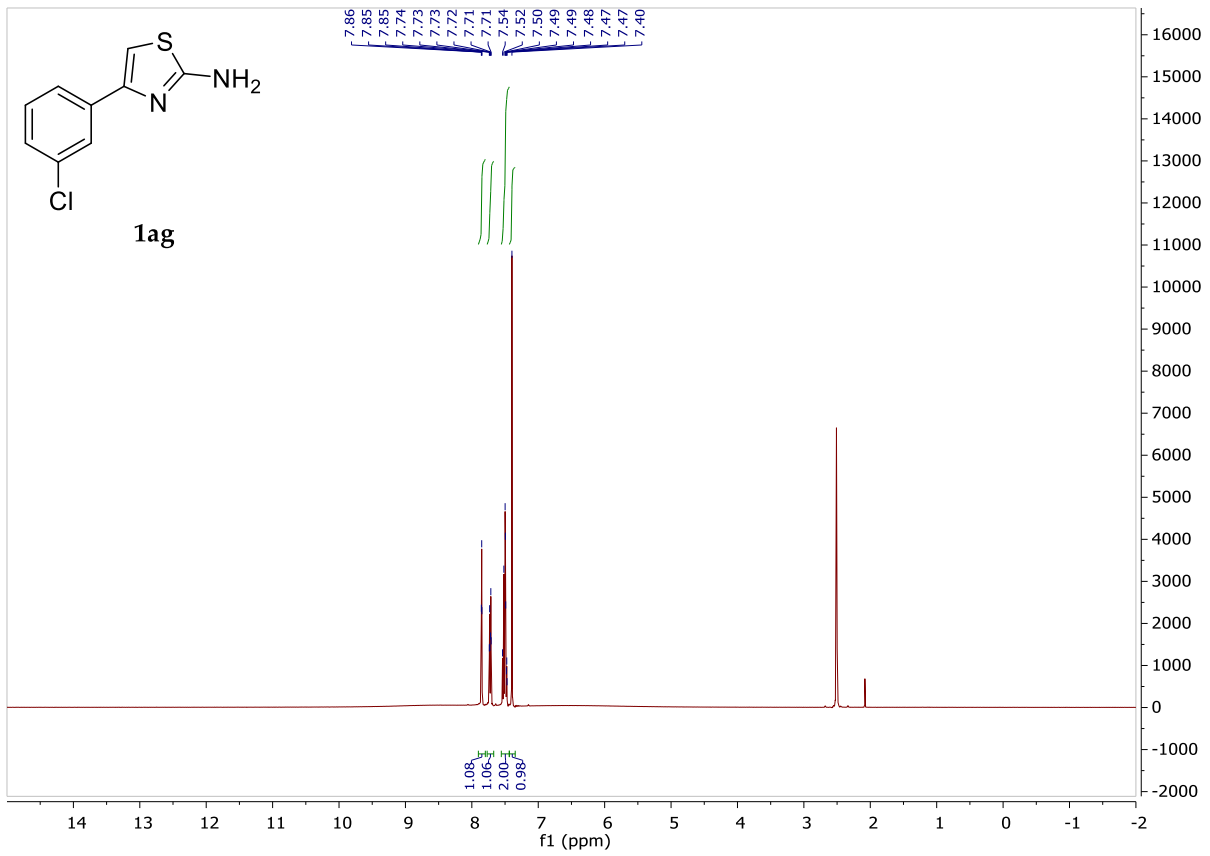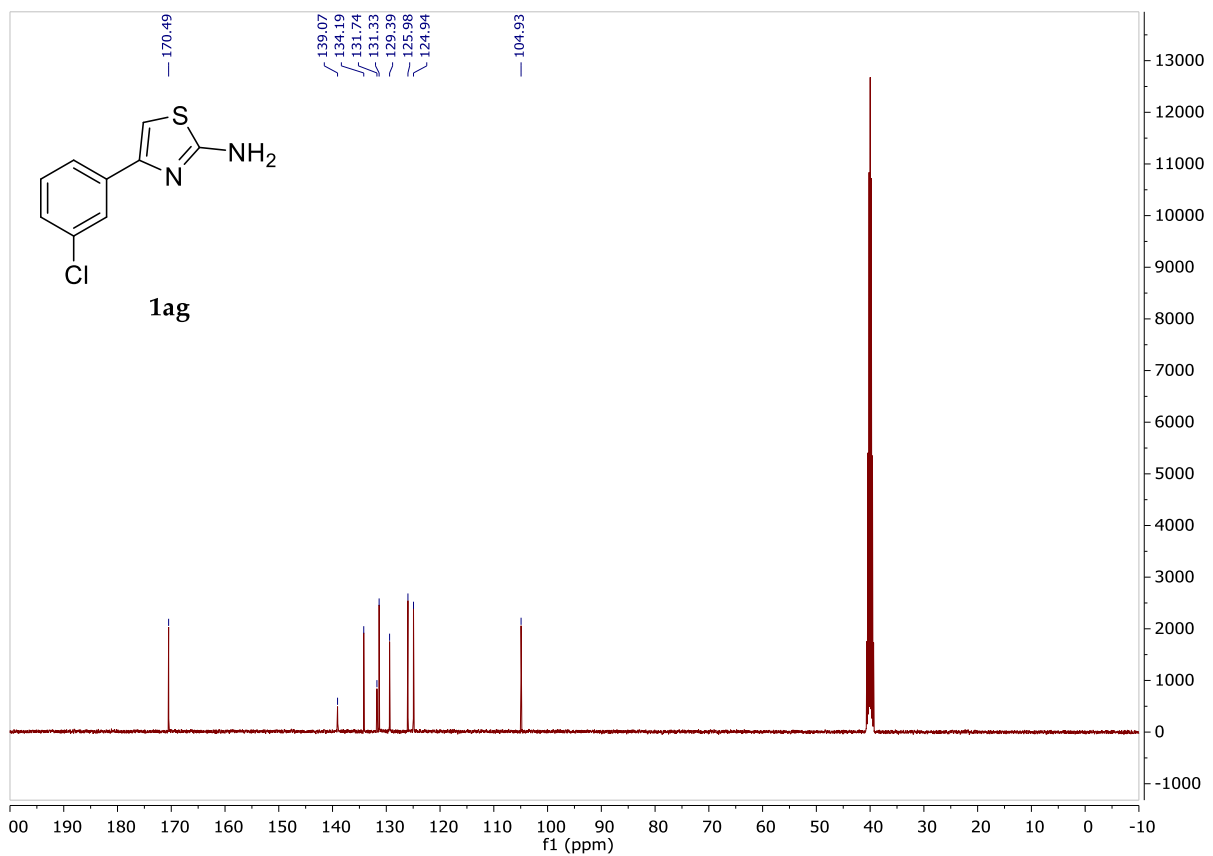



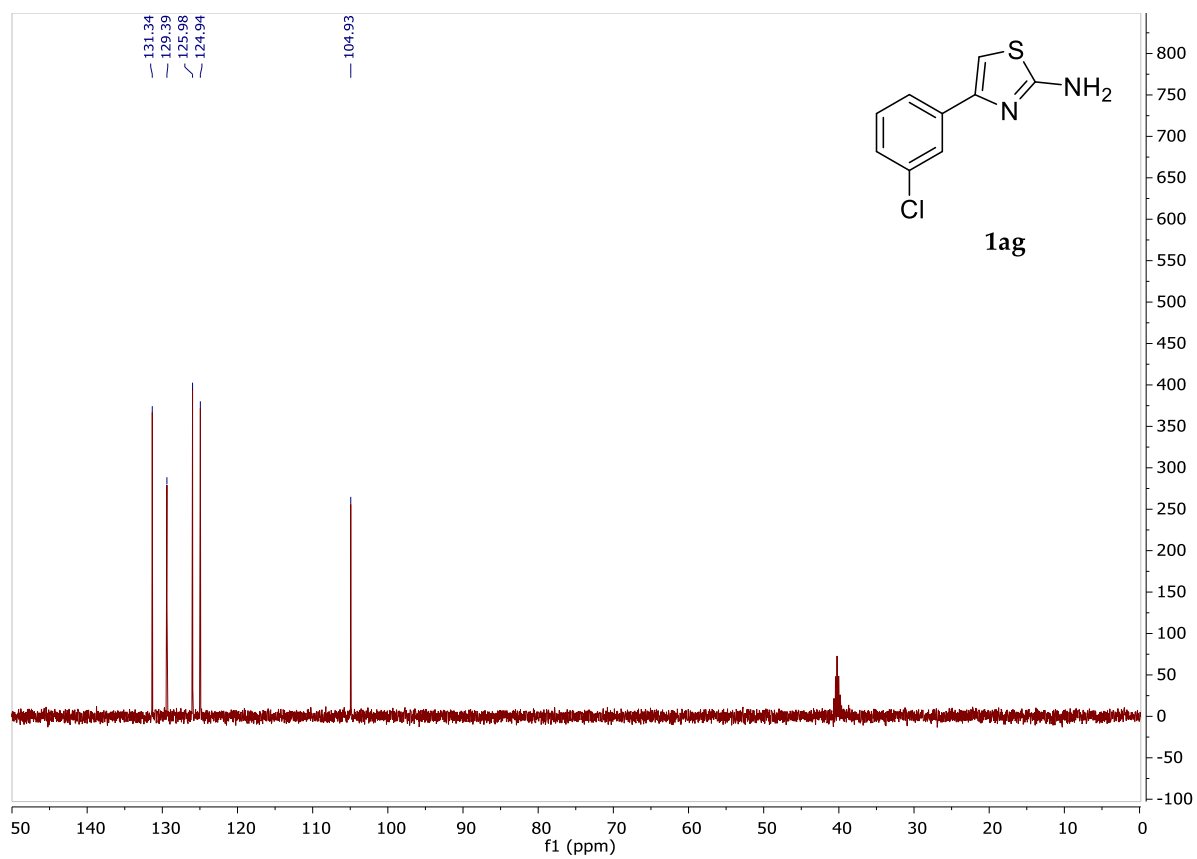

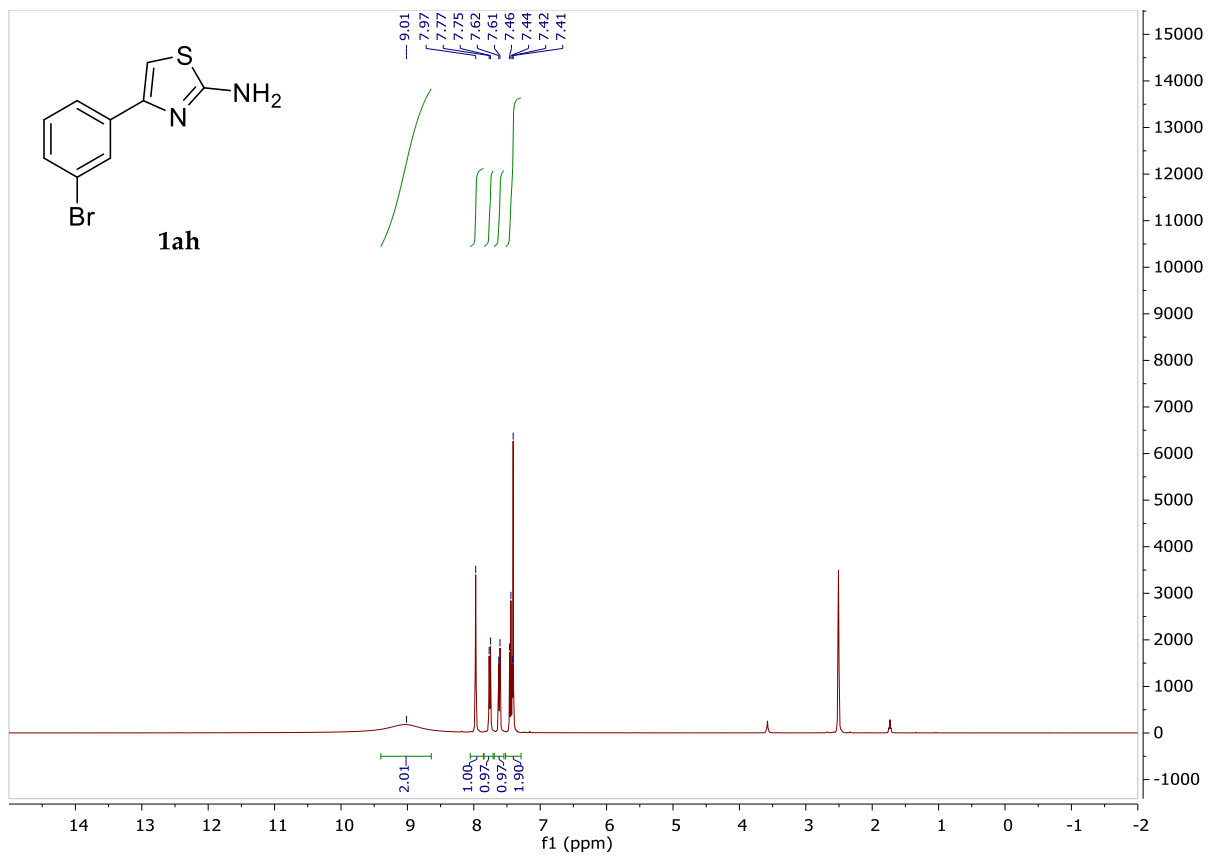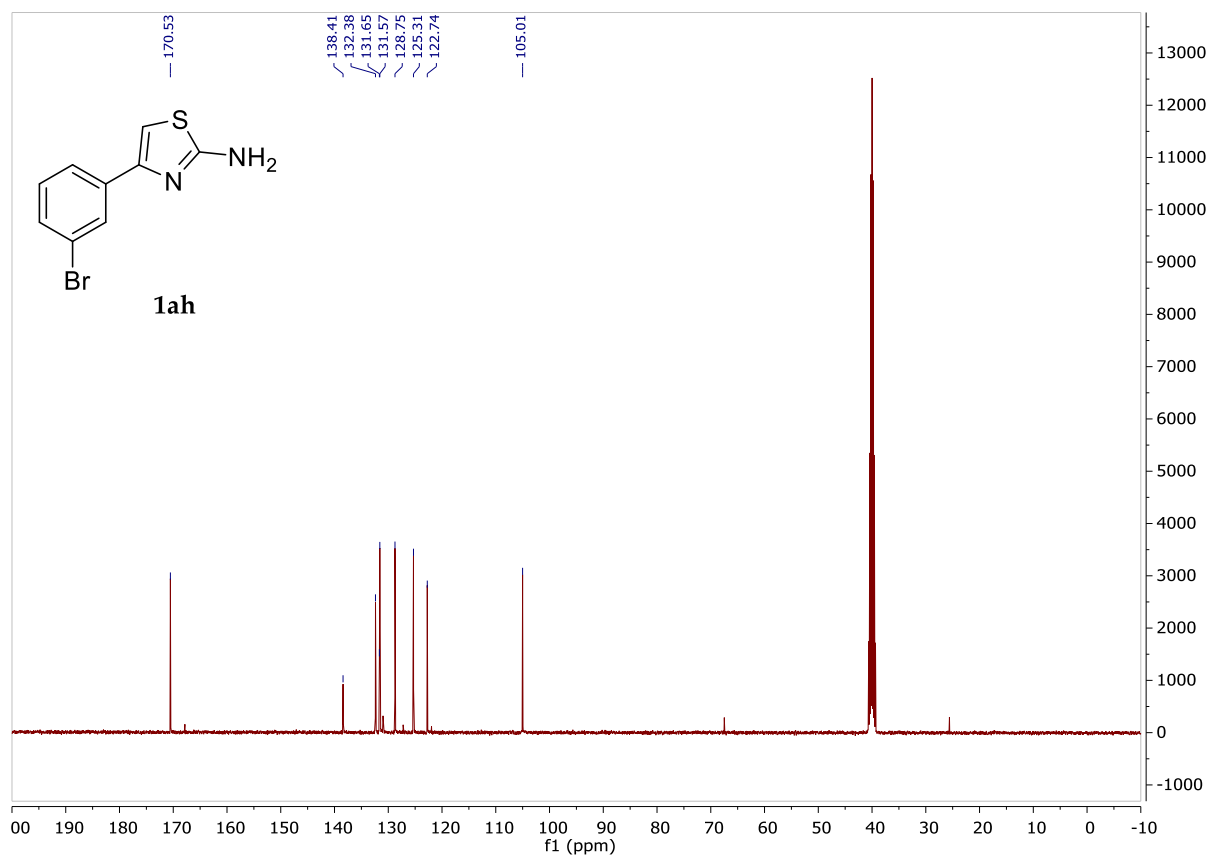

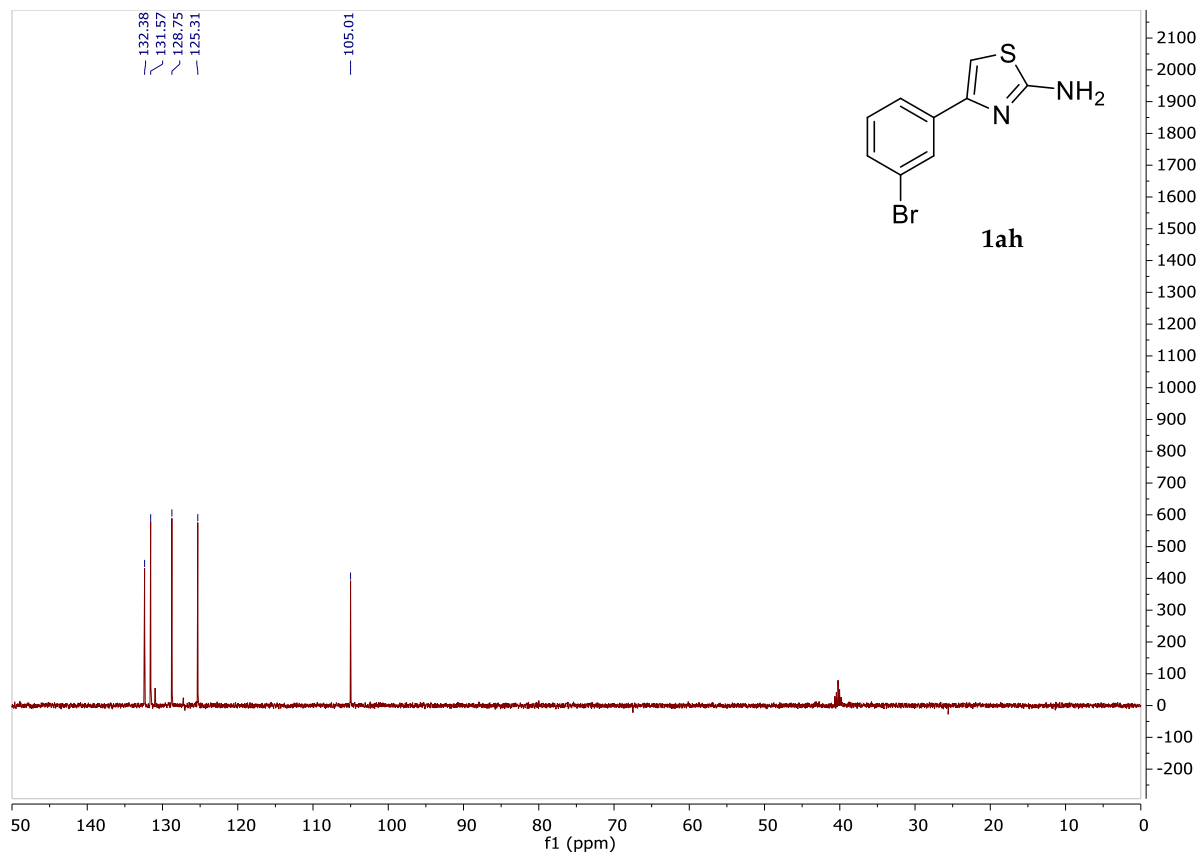

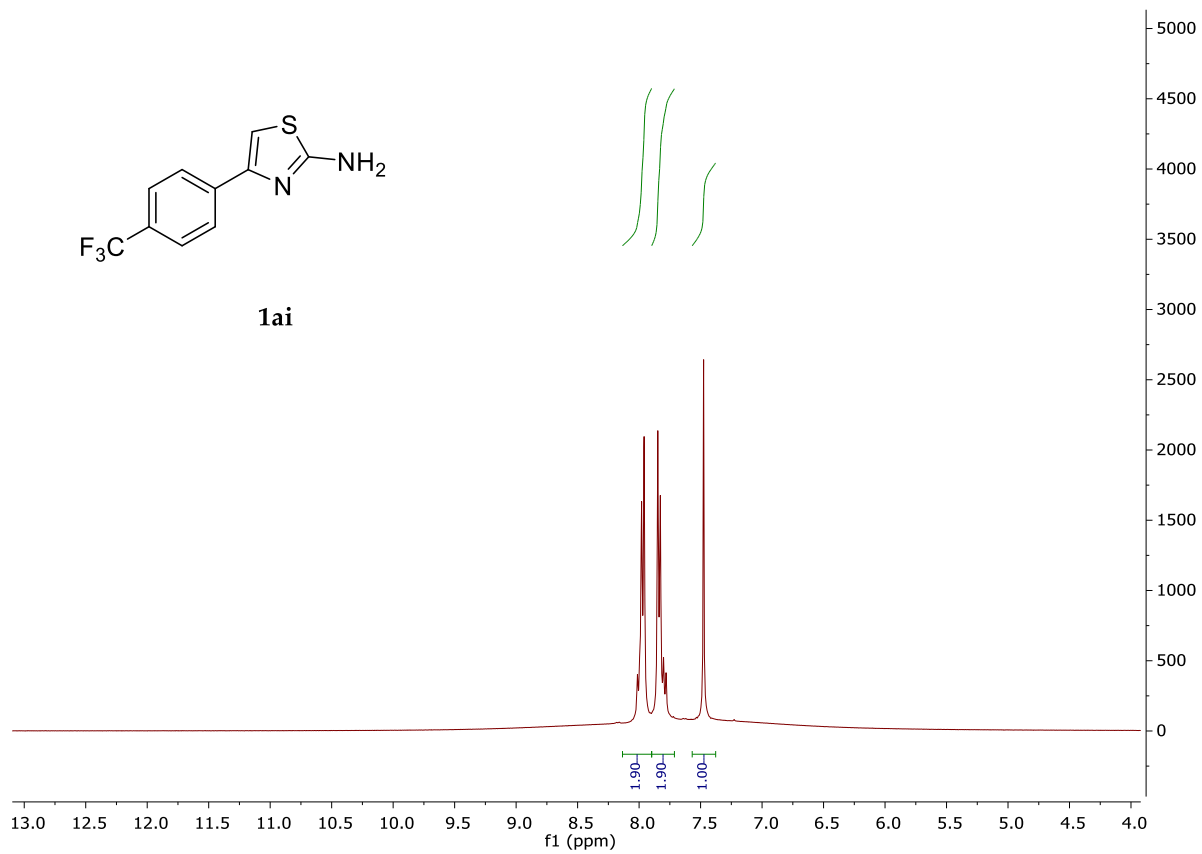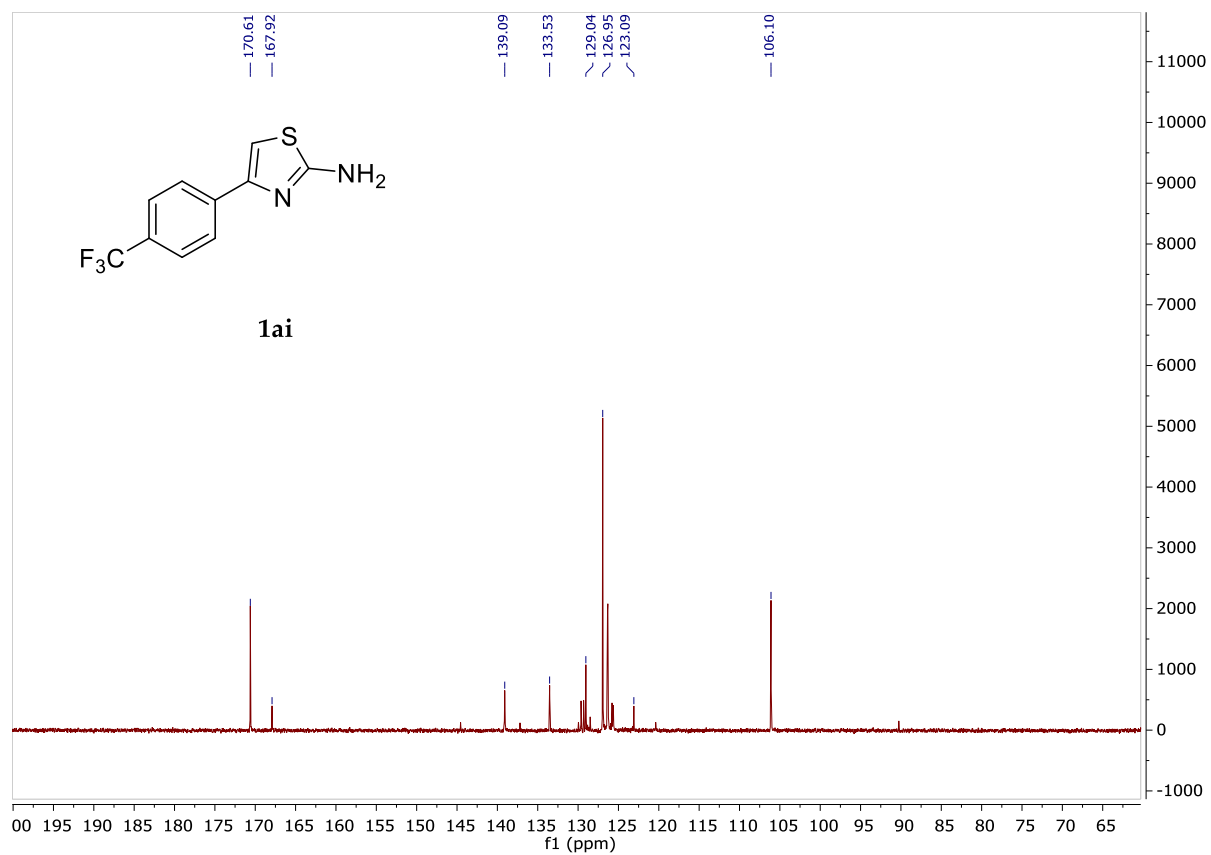

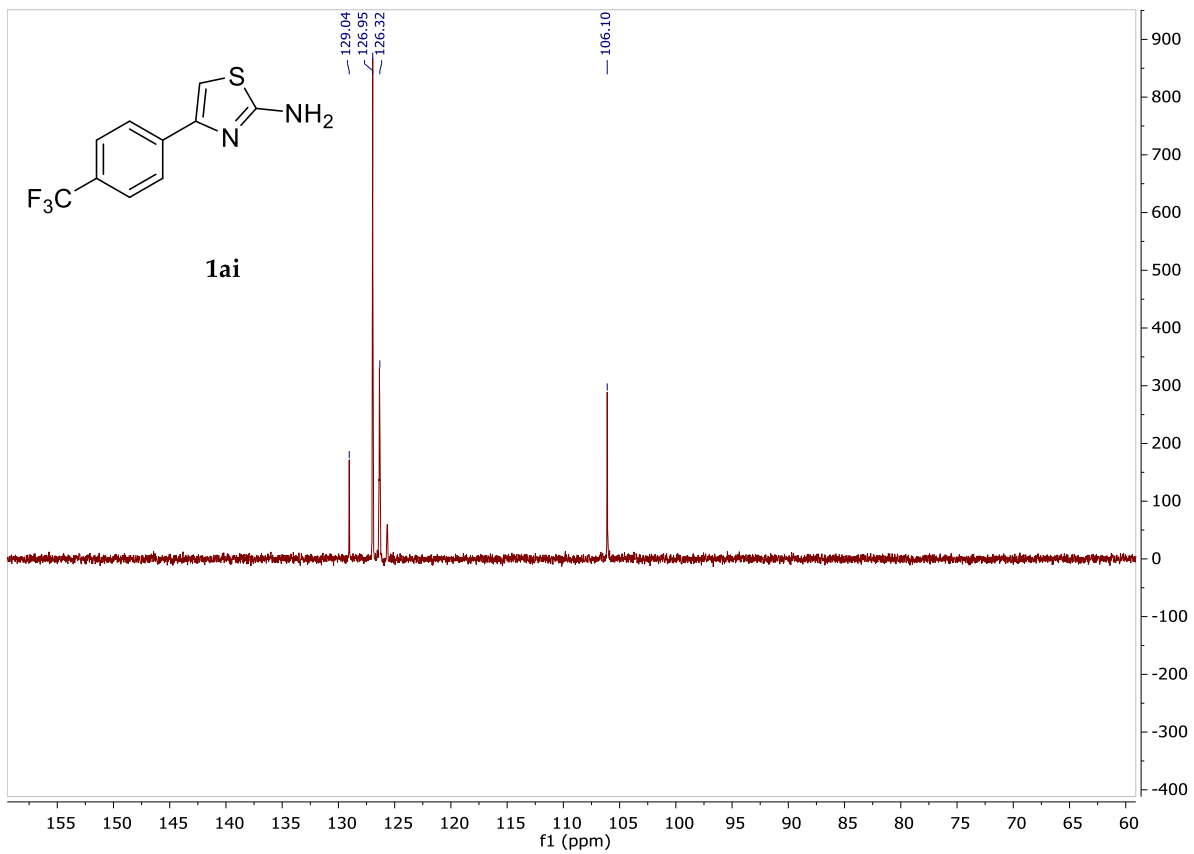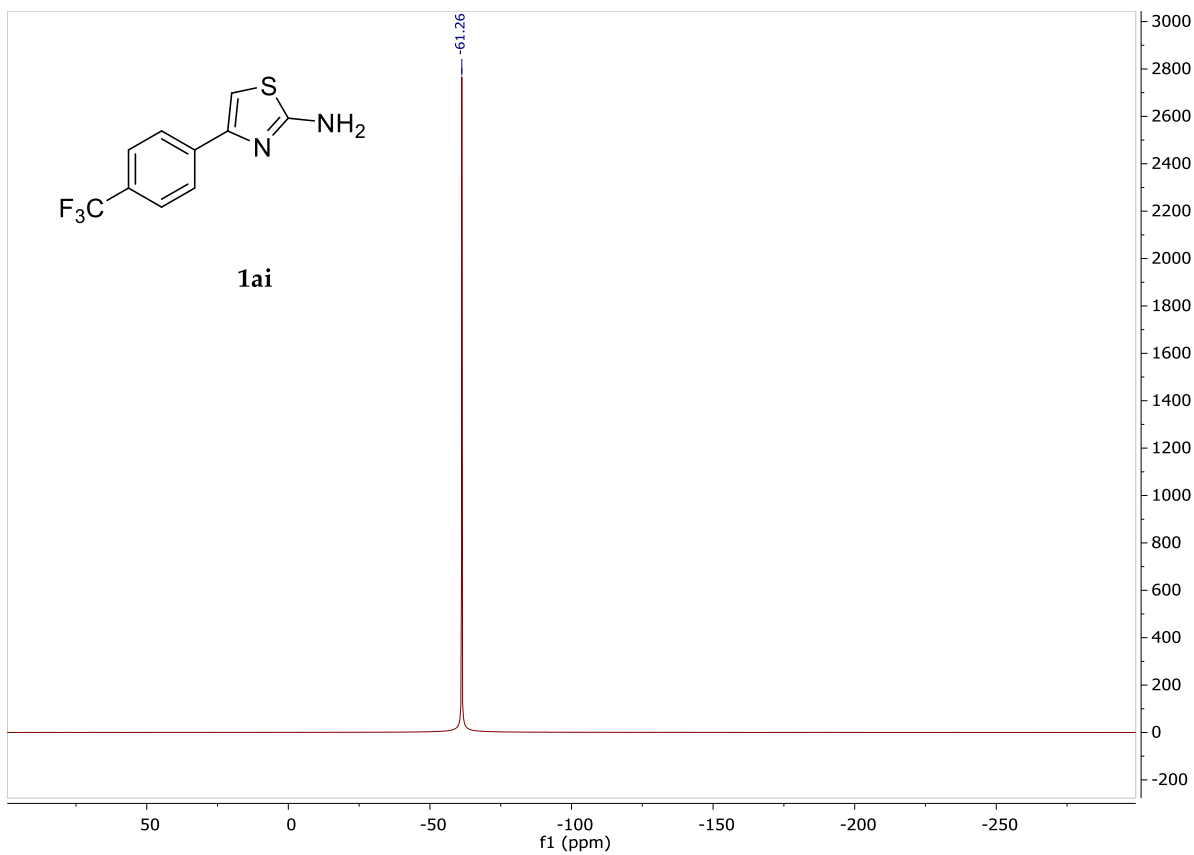

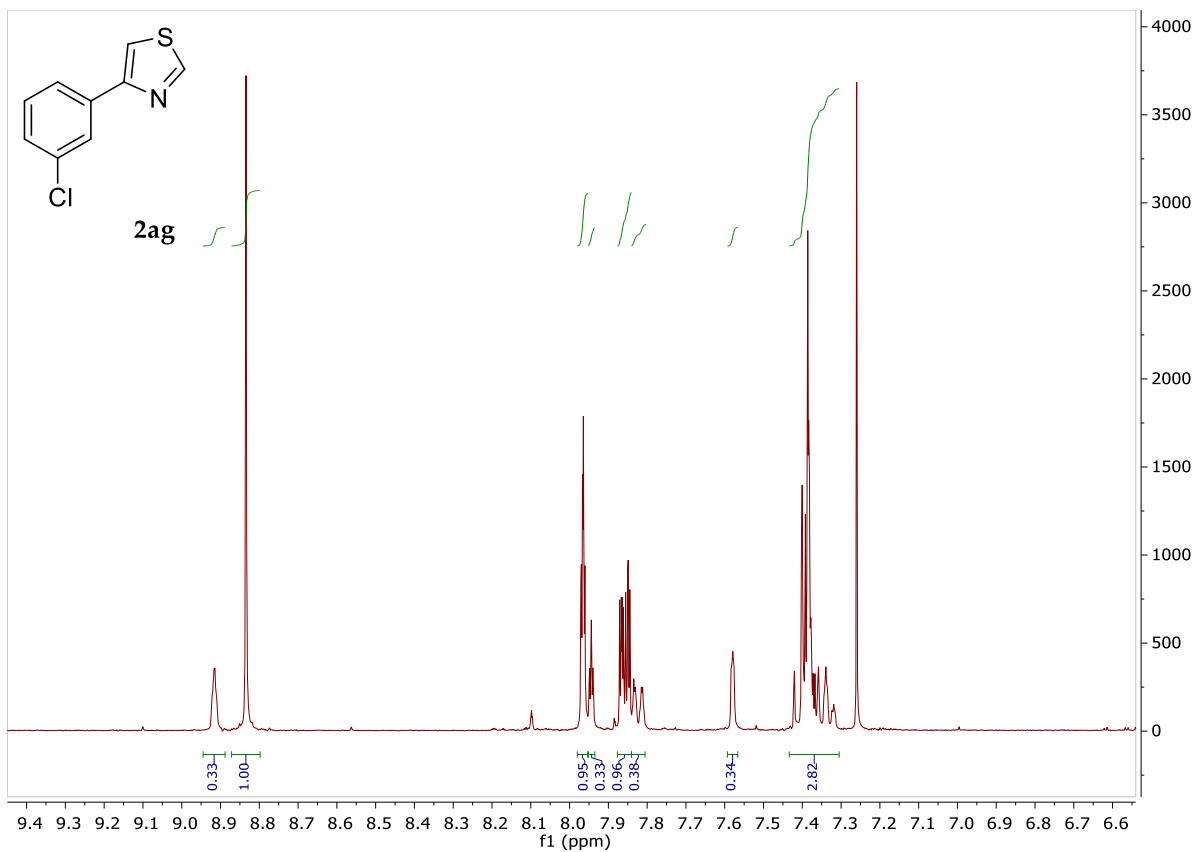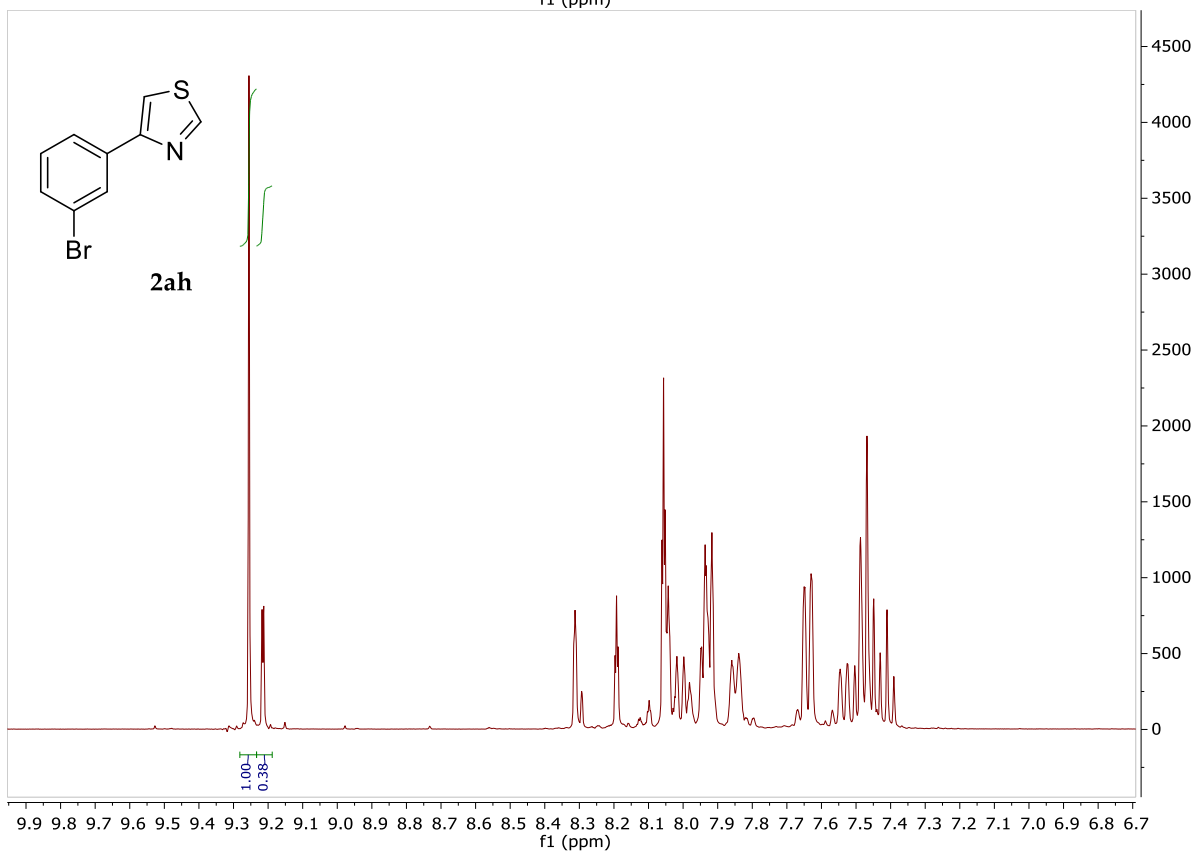

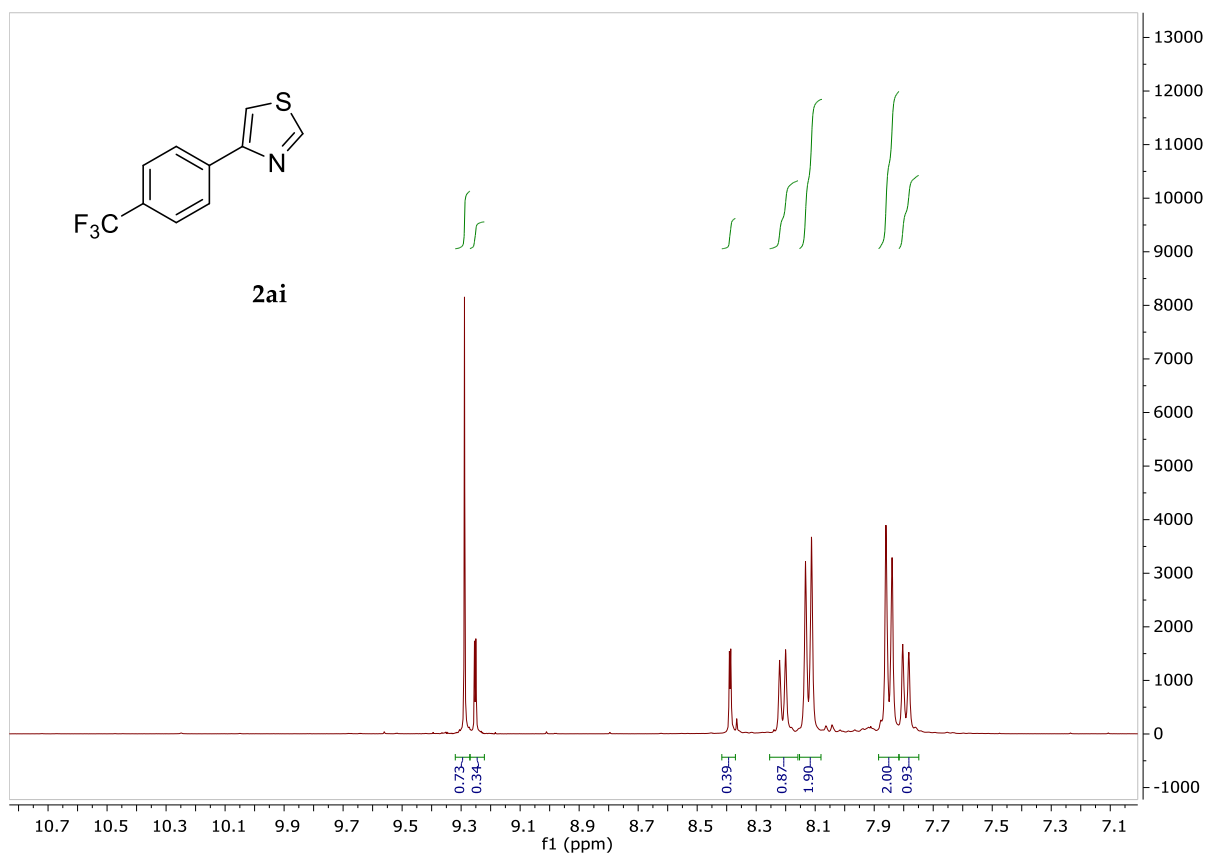

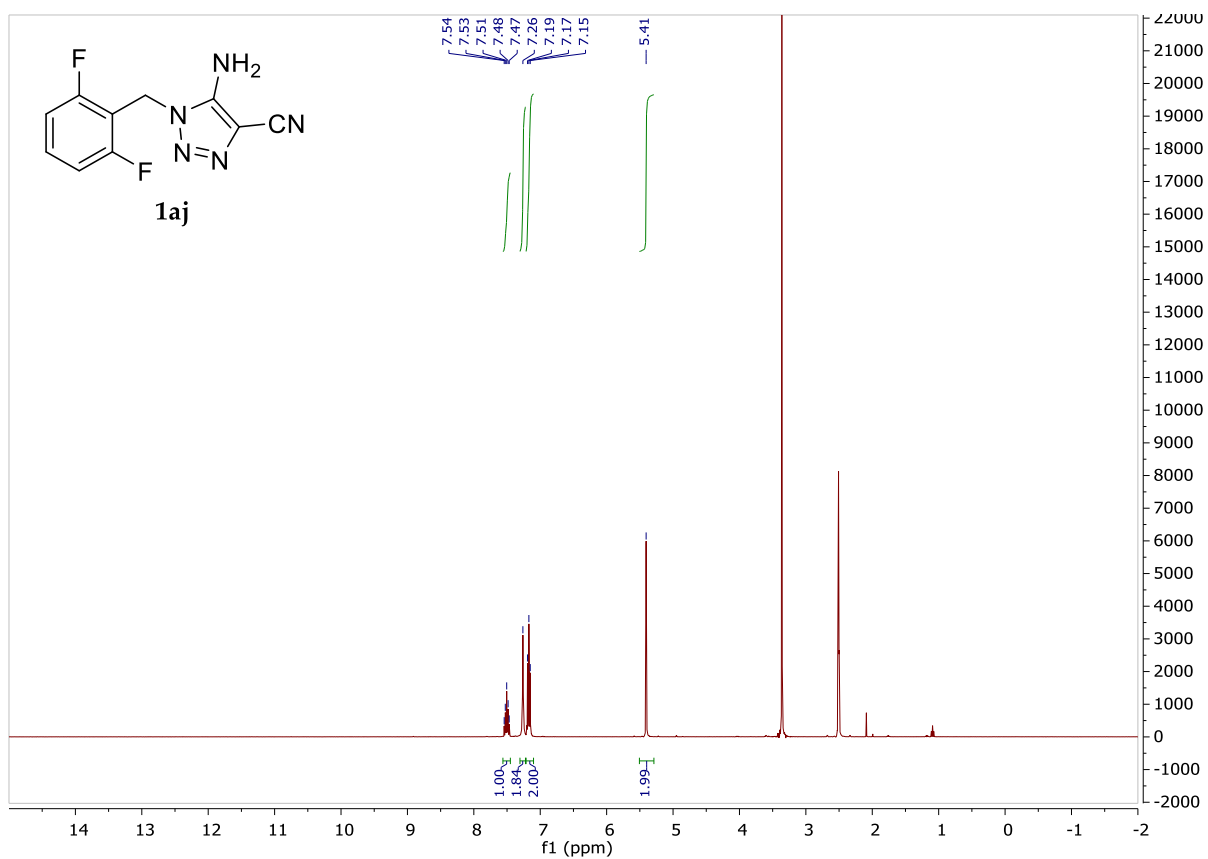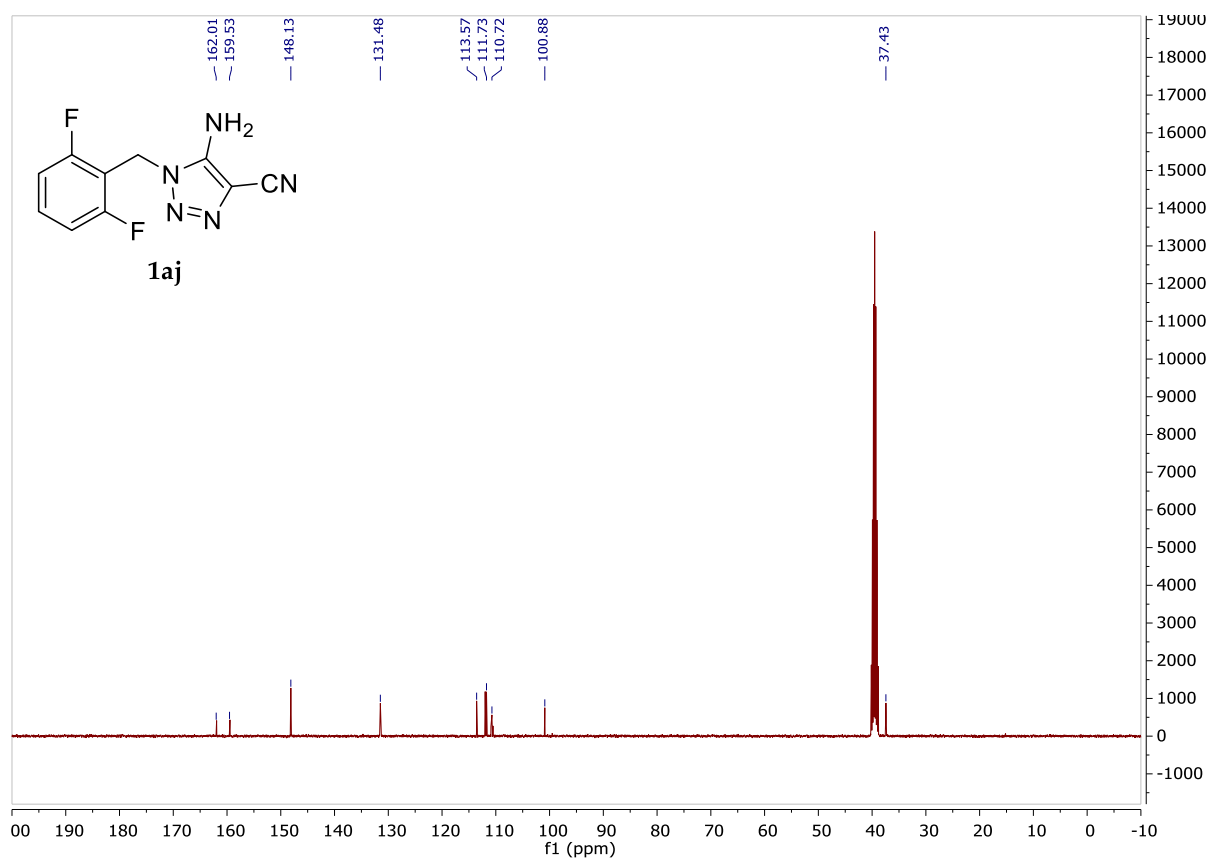



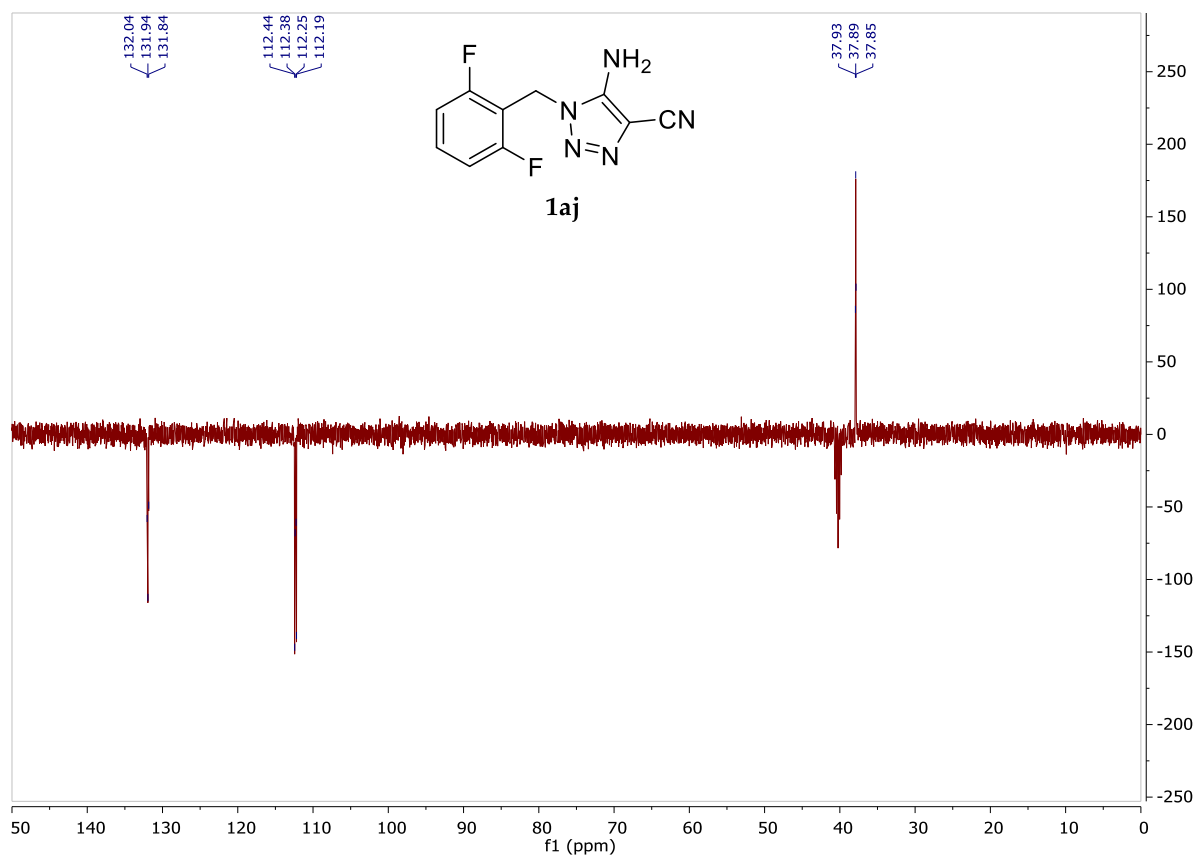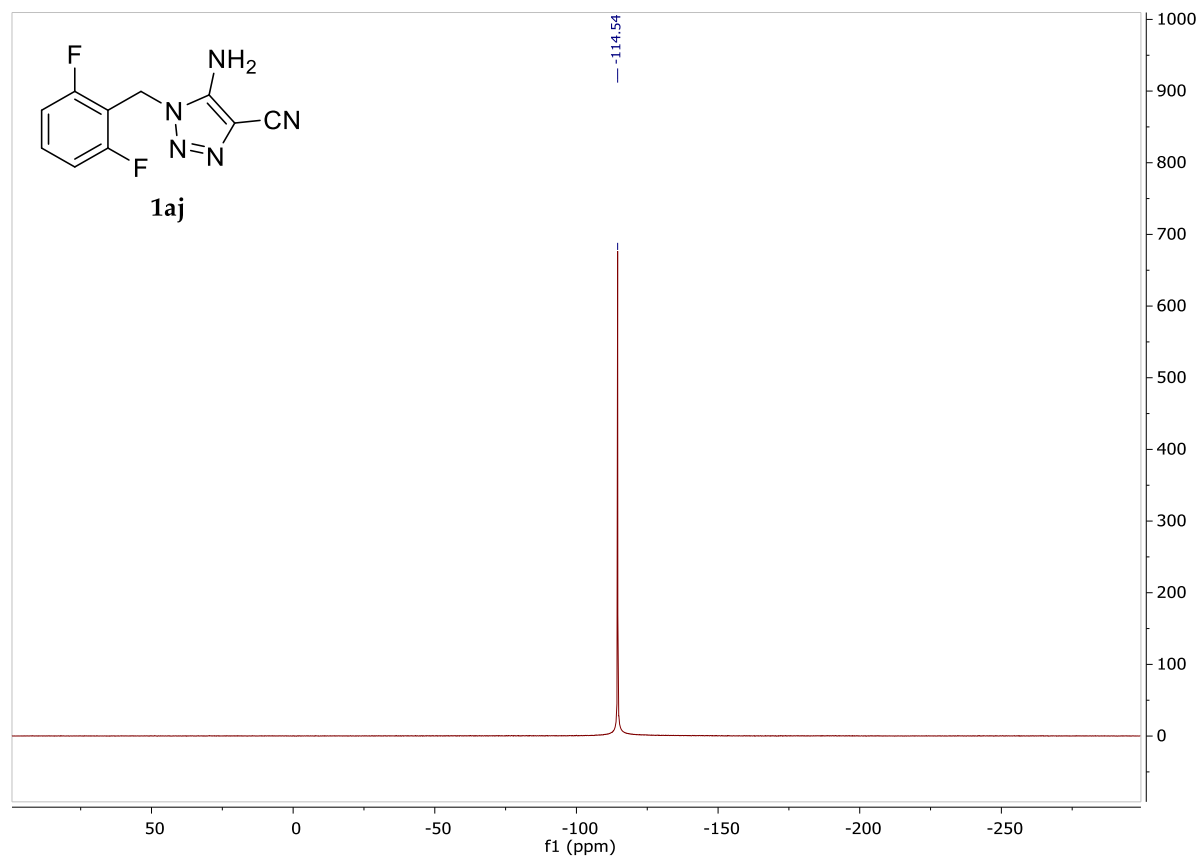

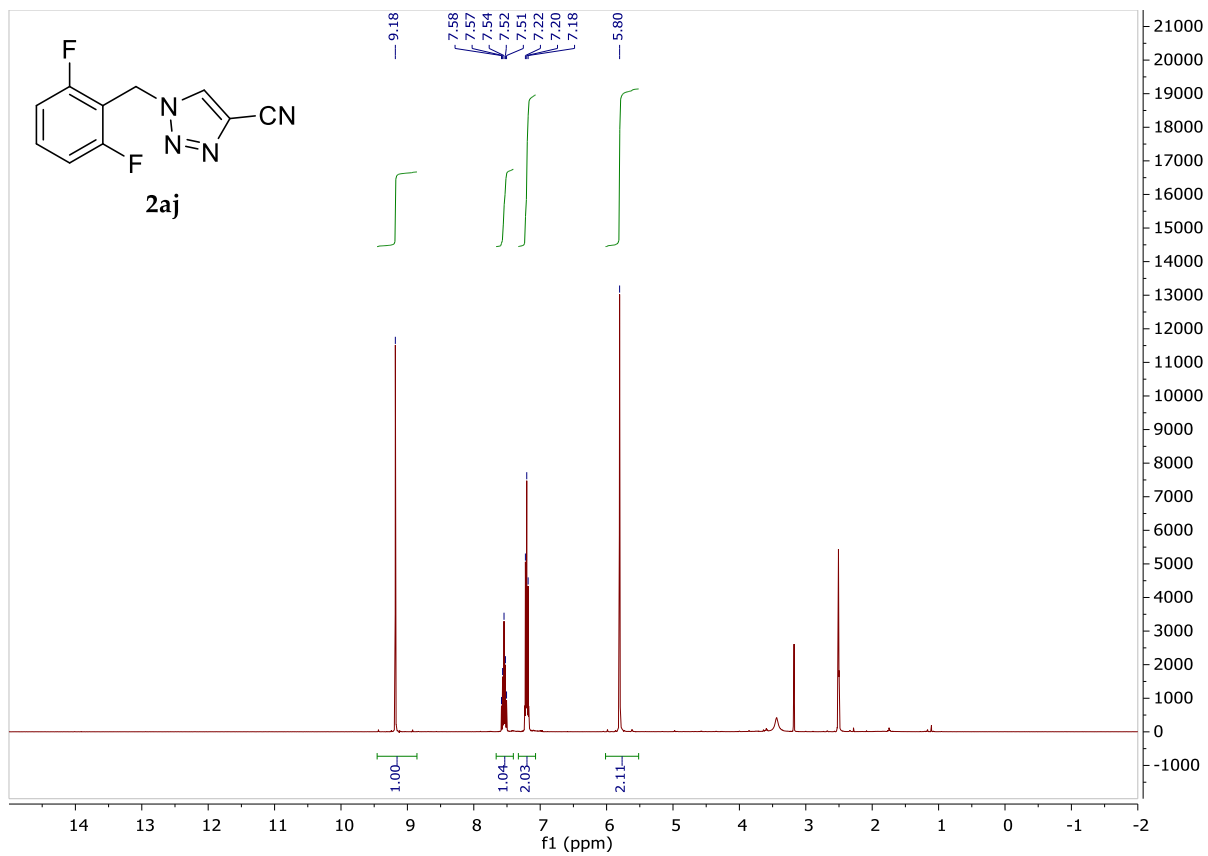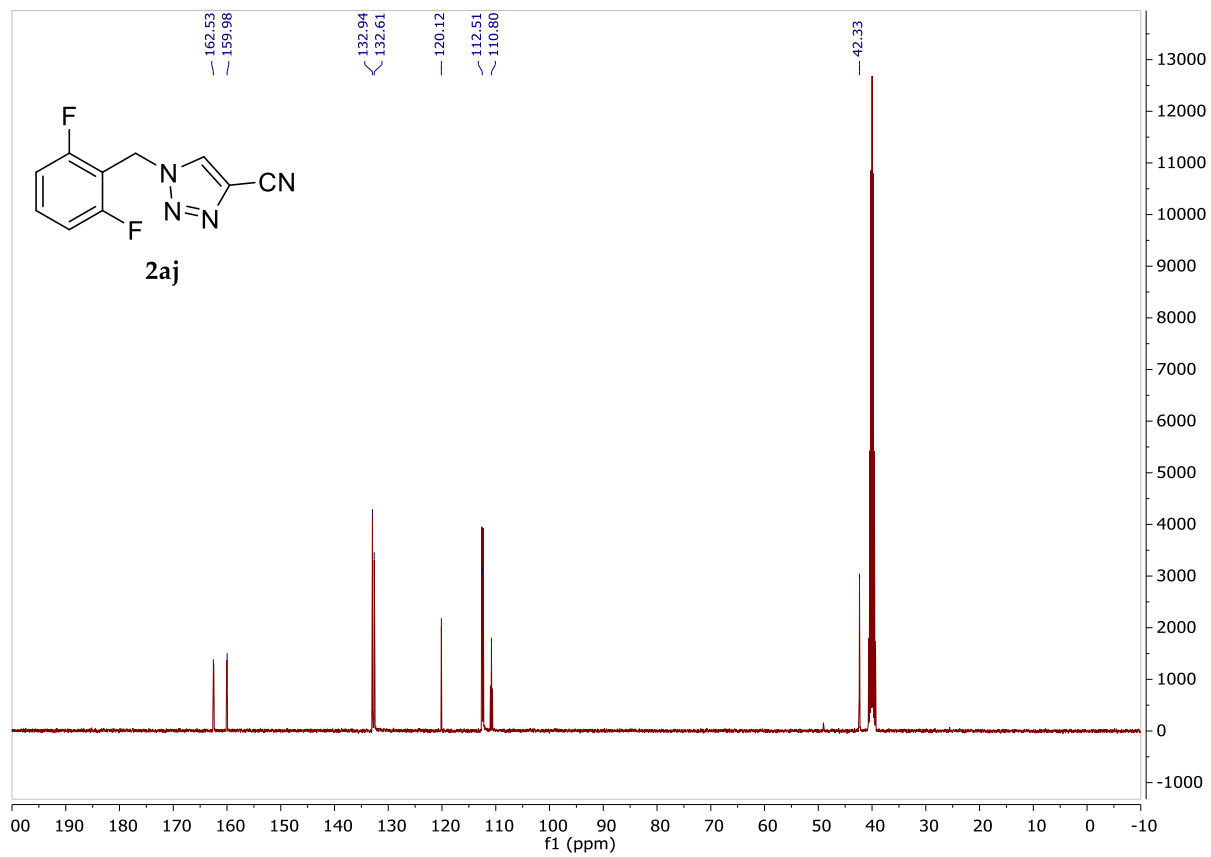

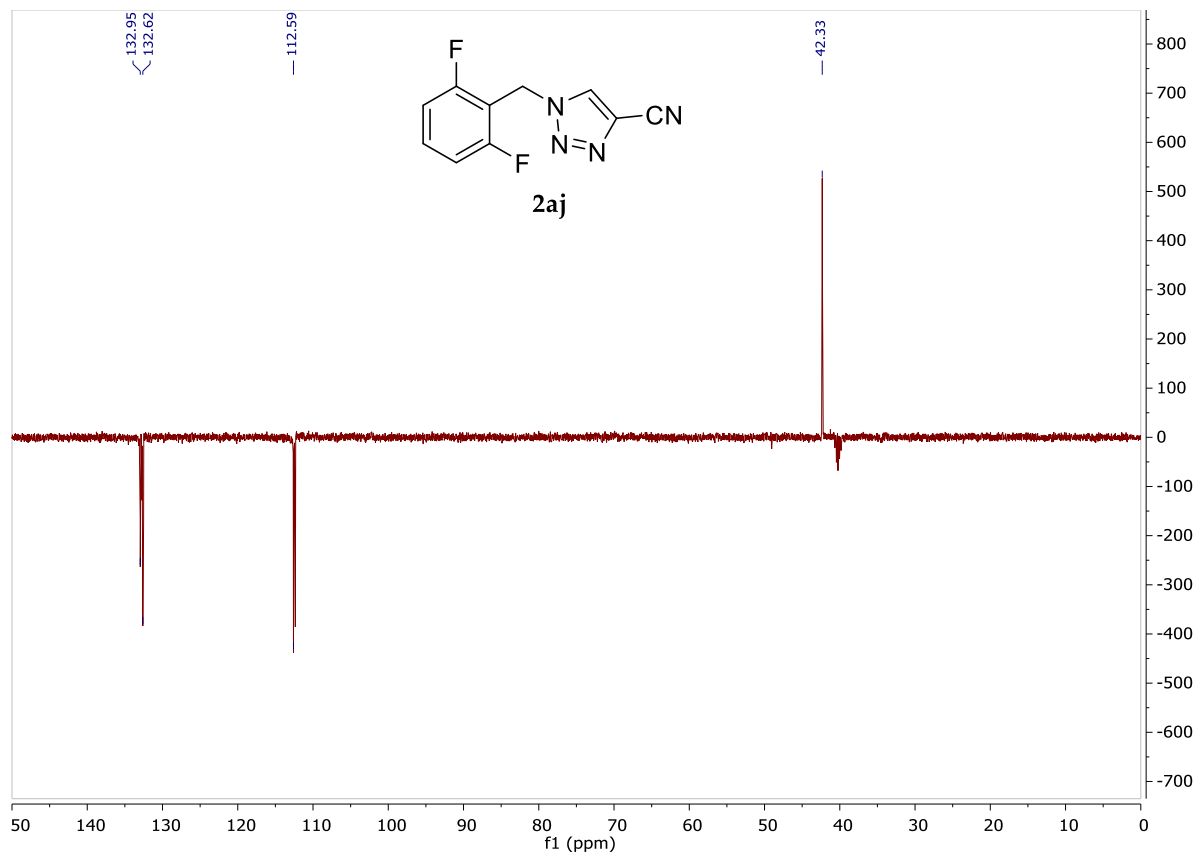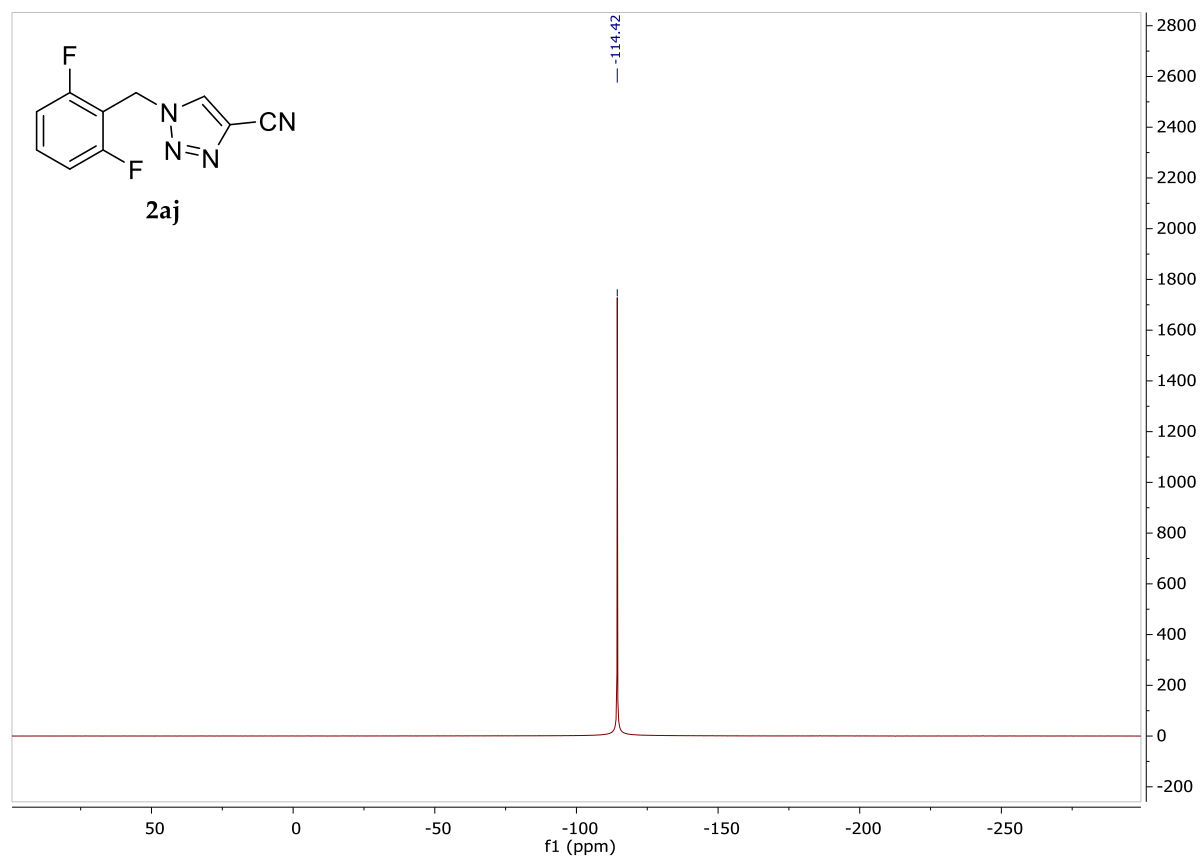

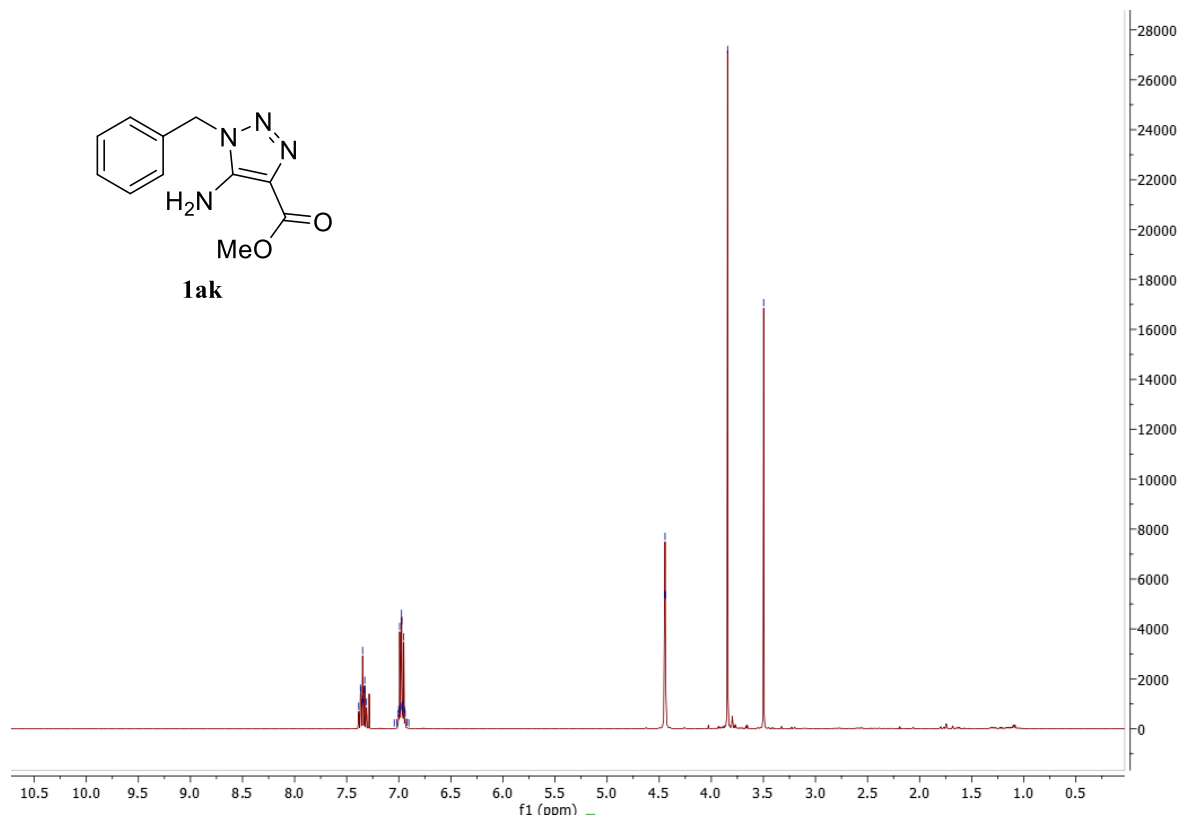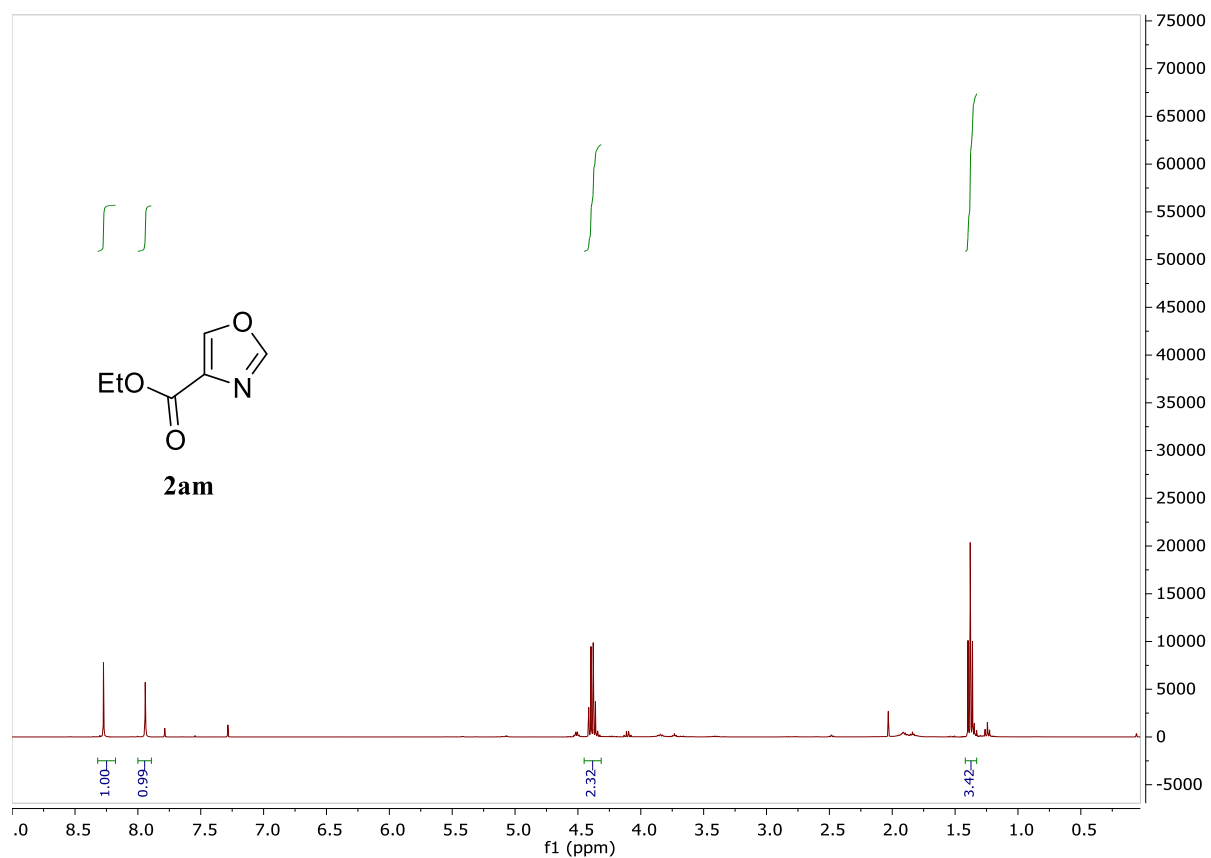

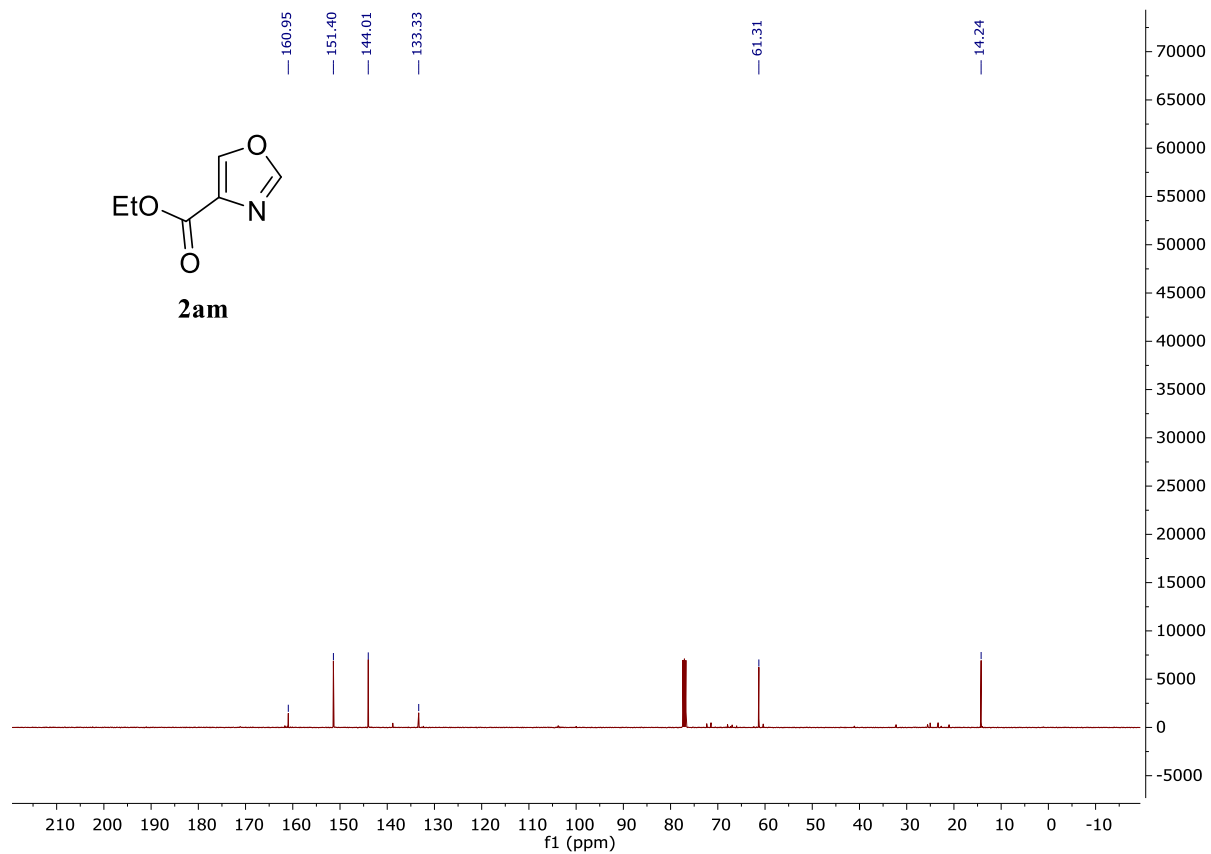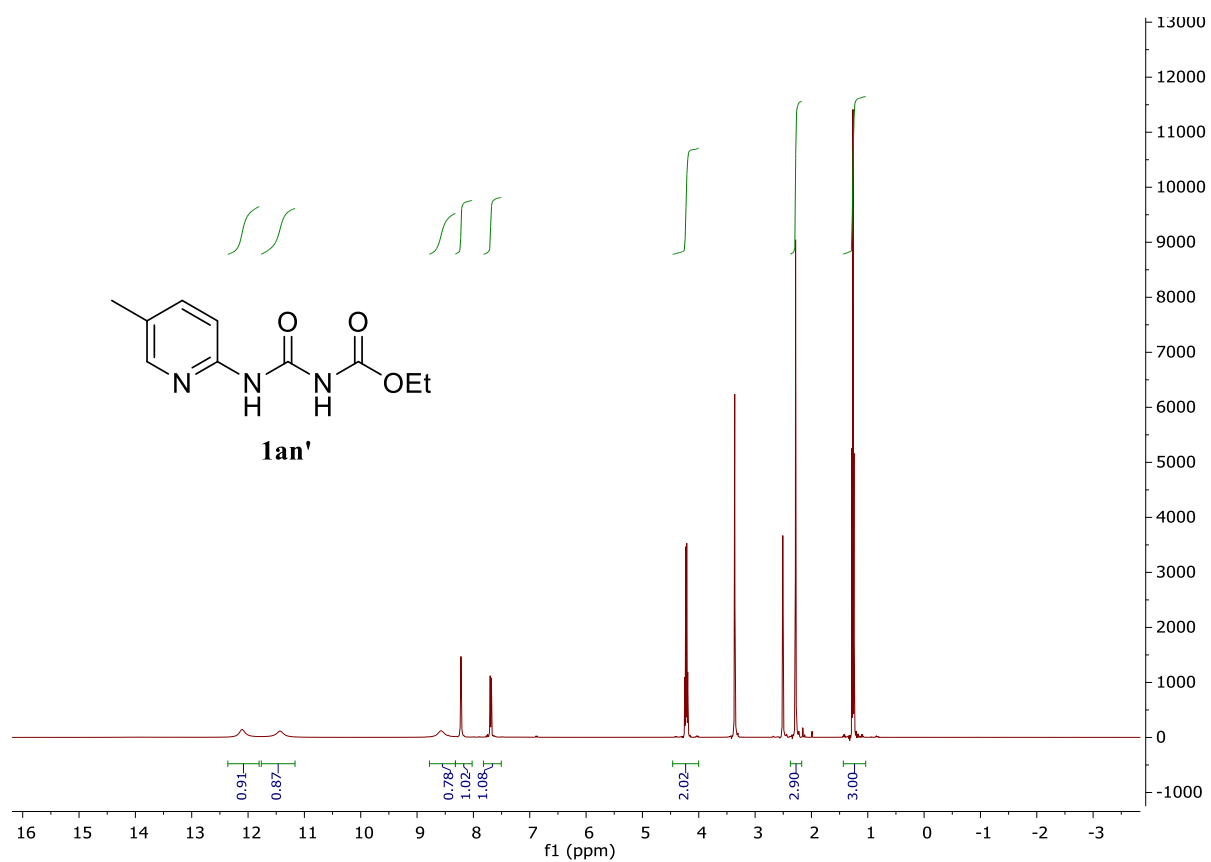

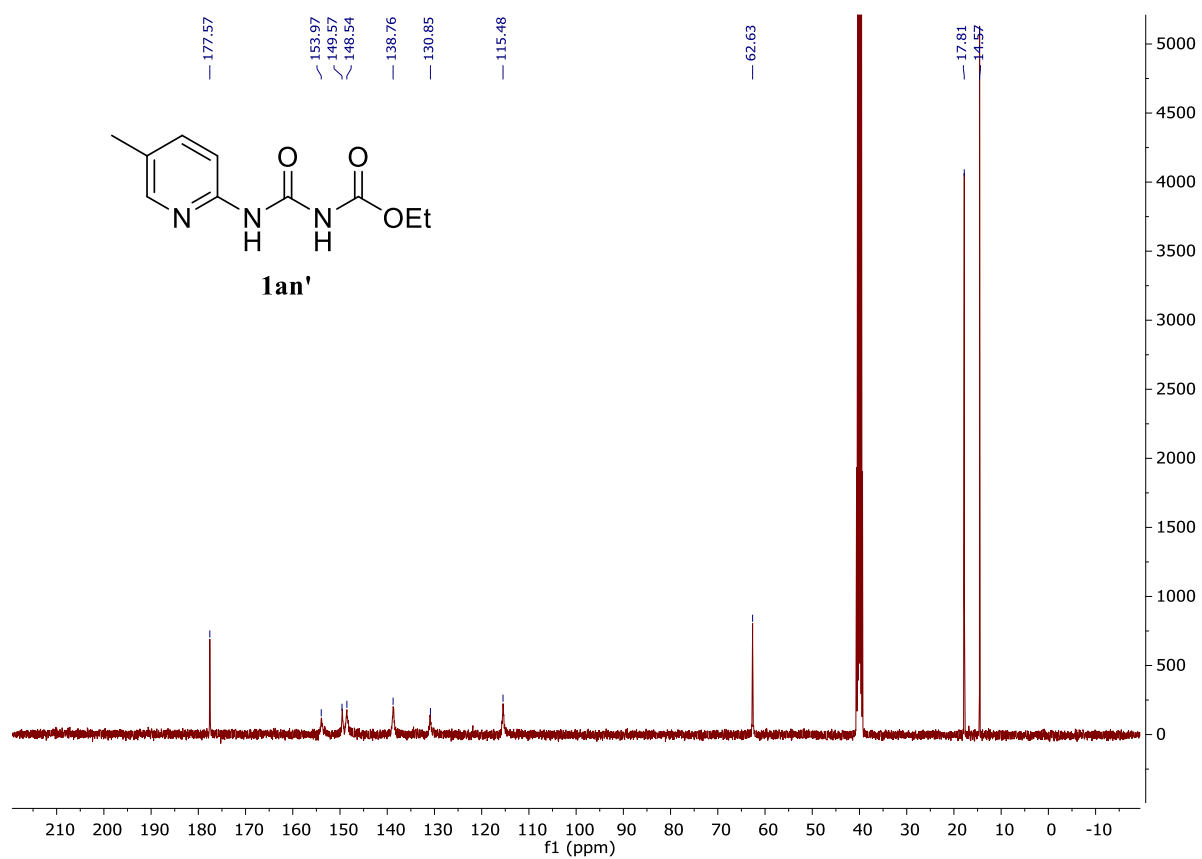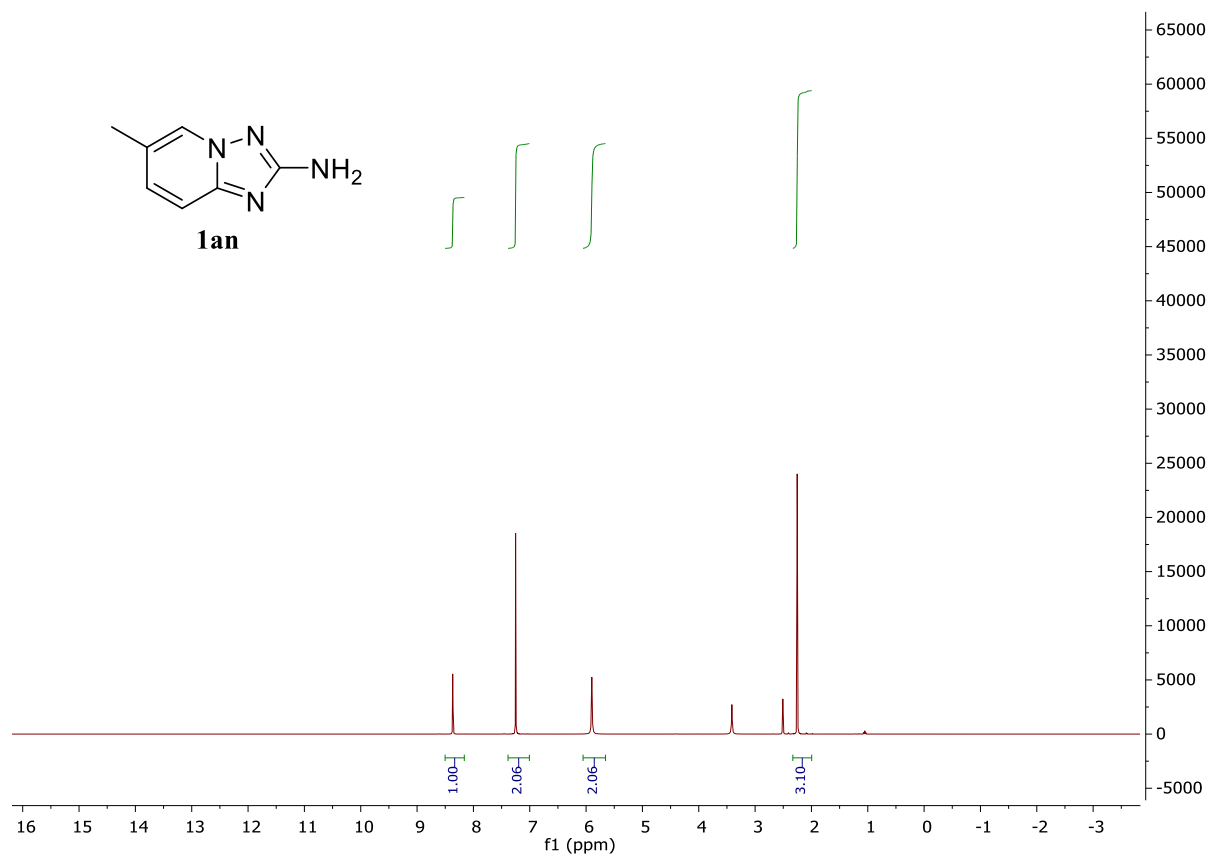

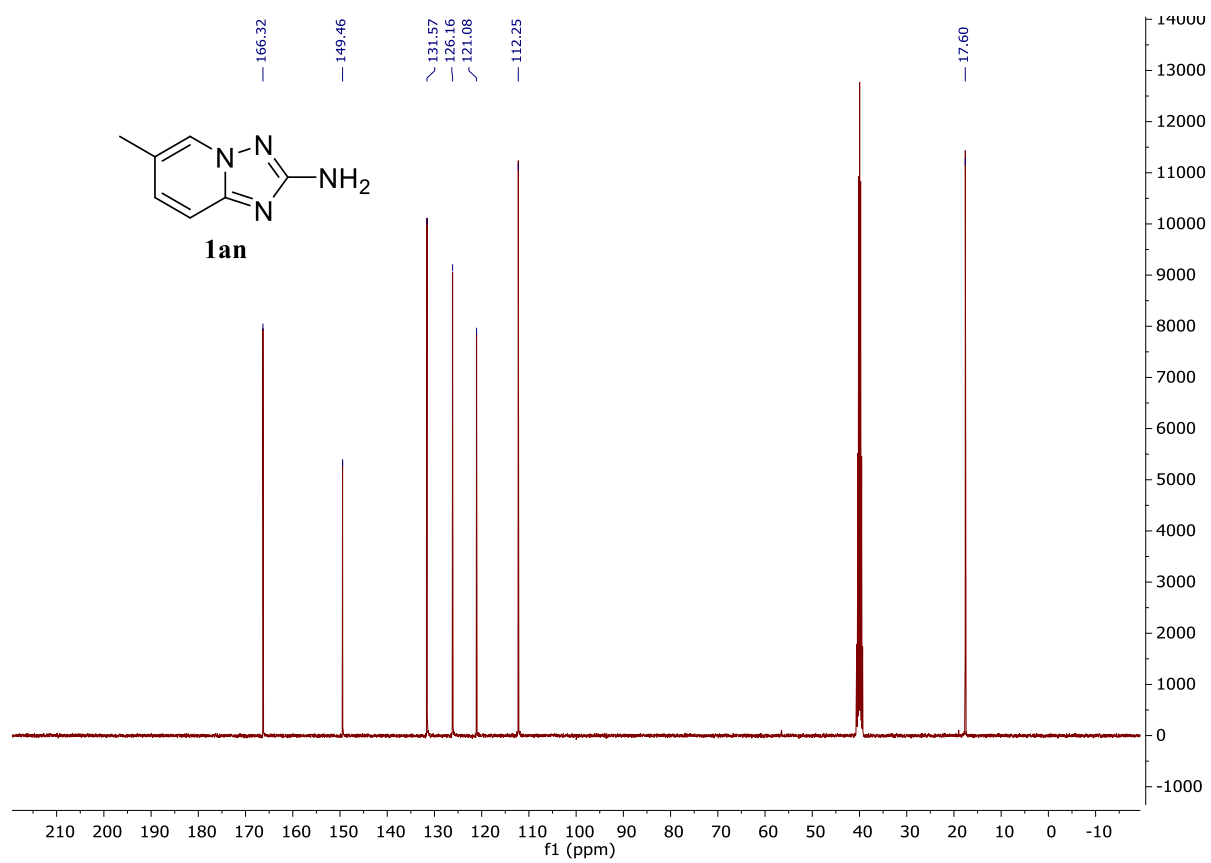

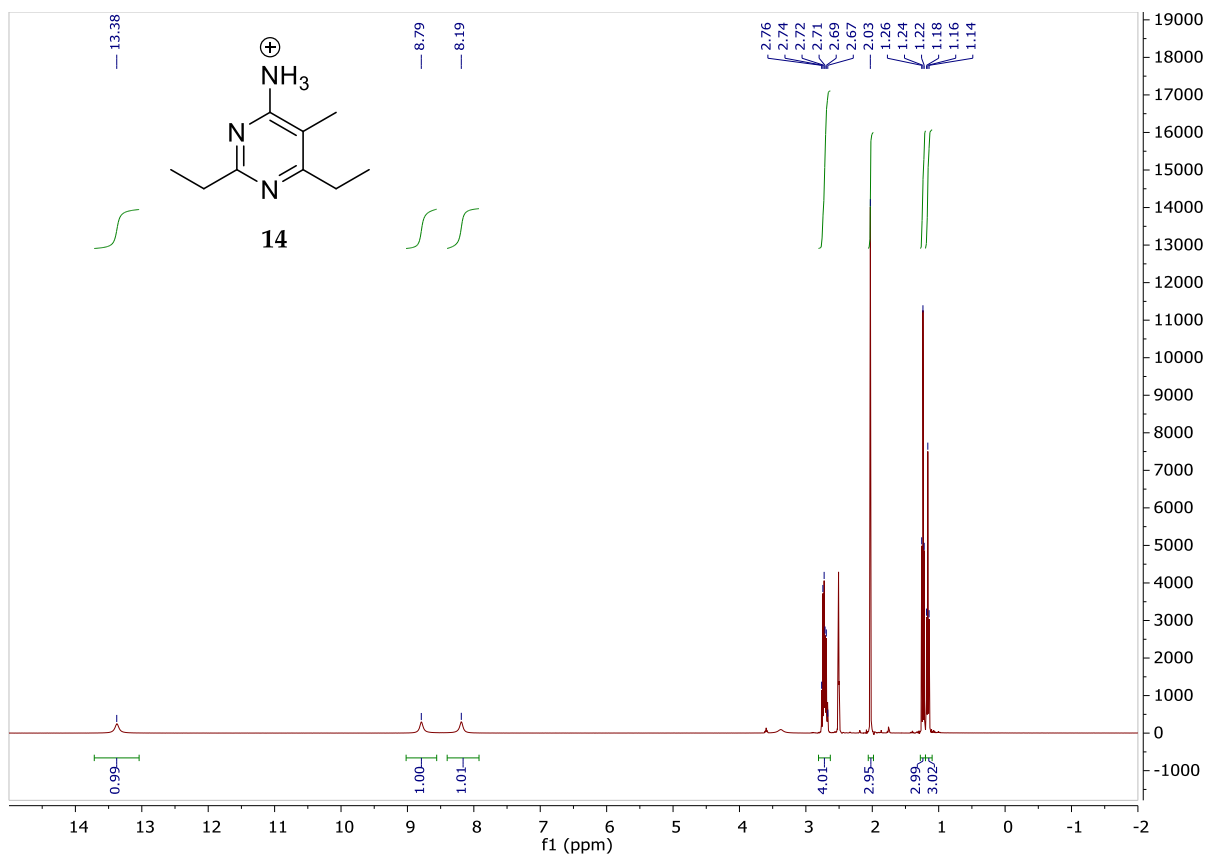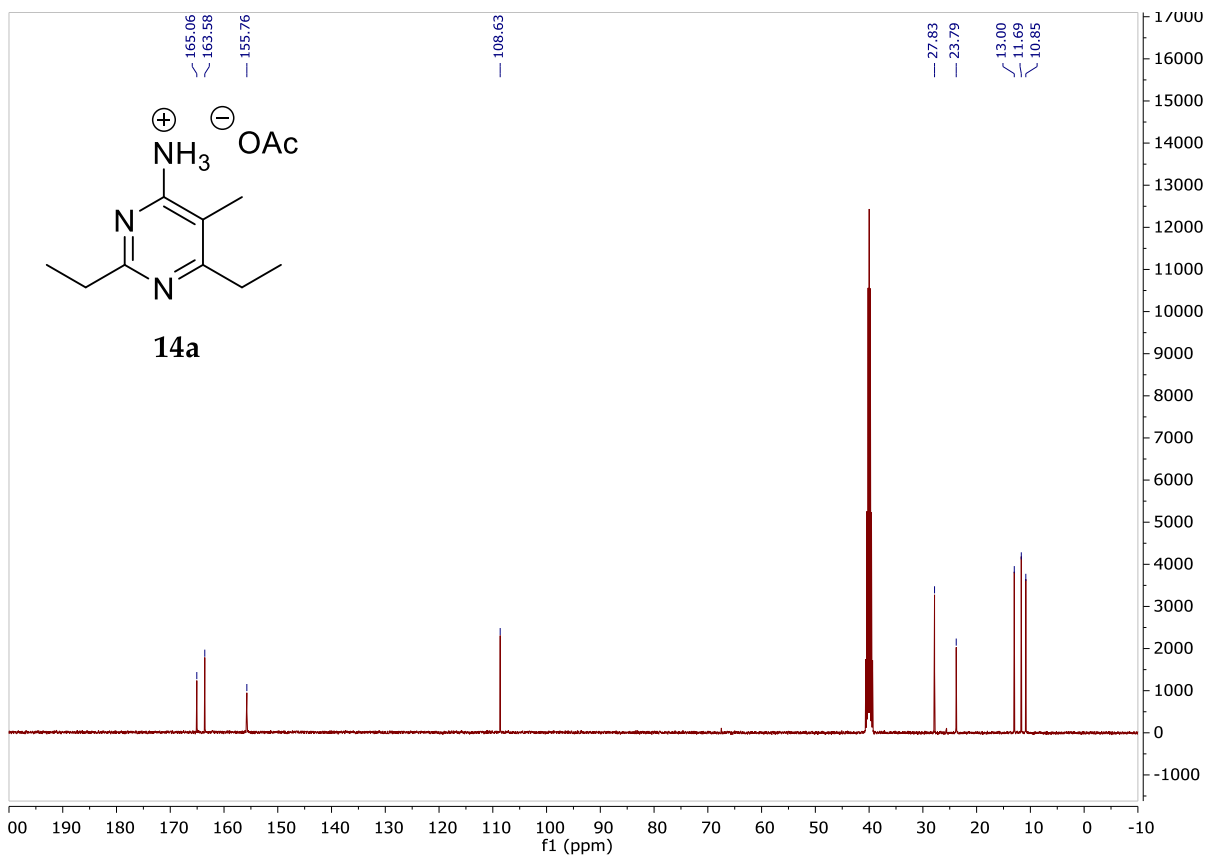



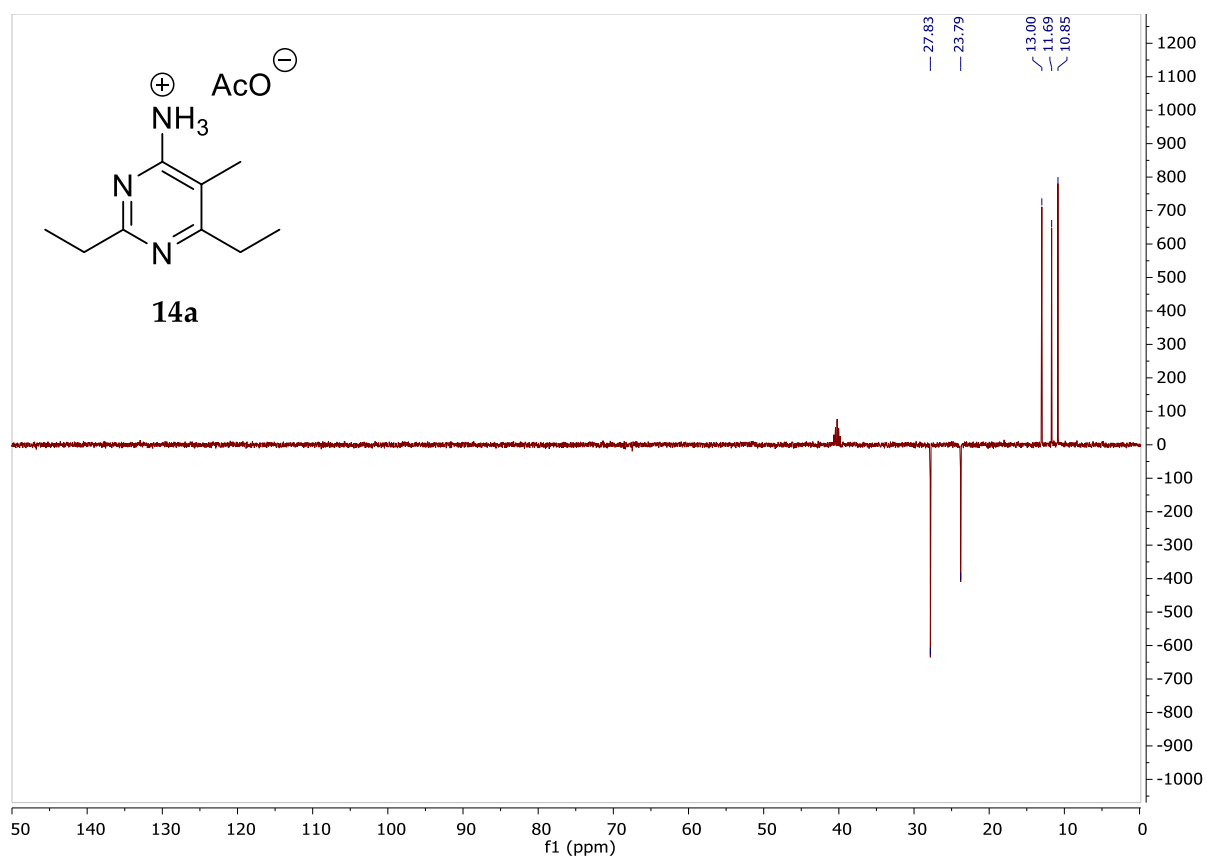

Supplement: molecules-24-01996-s001.pdf [file molecules-24-01996-s001.pdf]
